# Supplementary material for: Enantioselective intramolecular Pictet–Spengler type annulation of indole-linked 3-methyleneisoindolin-1-ones
Source: Royal Society of Chemistry journal article supplement (doi:10.1039/d2nj00517d), 2022-01-01

**New J. Chem.**

**Enantioselective Intramolecular Pictet-Spengler Type Annulation of  
Indole-Linked 3-Methyleneisoindolin-1-Ones**

Min Liu, Wenzhe Li, Min Huang, Yingkun Yan, Min Li, Lianyi Cao  
and Xiaomei Zhang\*

---

## 1. General remarks

Chemicals were purchased from commercial suppliers and used without further purification unless otherwise stated. Chiral phosphoric acids **CPA1-CPA12**, compounds **3a**, **3e**, **3h**, **4a-4e**, **4g**, **4j** and **5** were purchased from commercial suppliers. Solvents were dried and purified according to the standard procedures before use. Reactions were monitored by TLC. Racemic products were obtained from corresponding substrates catalyzed by TsOH at 100 °C. Flash column chromatography was performed on silica gels (200-300 mesh). <sup>1</sup>H NMR and <sup>13</sup>C NMR (300 and 75 MHz, respectively) spectra were recorded on a Bruker 300 MHz NMR spectrometer in CDCl<sub>3</sub> or DMSO-*d*<sub>6</sub>. <sup>1</sup>H NMR chemical shifts are reported in ppm ( $\delta$ ) relative to tetramethylsilane (TMS) with the solvent resonance employed as the internal standard (CDCl<sub>3</sub>,  $\delta$  7.26 ppm, DMSO-*d*<sub>6</sub> at 2.50 ppm). Data are reported as follows: chemical shift, multiplicity (s = singlet, brs = broad singlet, d = doublet, t = triplet, td = triplet of doublets, q = quartet, m = multiplet), coupling constants (Hz) and integration. <sup>13</sup>C NMR chemical shifts are reported in ppm from tetramethylsilane (TMS) with the solvent resonance as the internal standard (CDCl<sub>3</sub>,  $\delta$  77.0 ppm, DMSO-*d*<sub>6</sub> at 39.51 ppm). HRMS data were obtained on a Bruker Daltonics Inc mass instrument (ESI). All enantiomeric ratios have been controlled by co-injections of the pure sample with the racemates. Chiralpak AD-H column, IC-H column and OD-H column were purchased from Daicel Chemical Industries (Hong Kong, China). Optical rotations were measured on a Perkin-Elmer 241 Polarimeter. Melting points were recorded on a Buchi Melting Point B-545.

## 2. Procedures and characterizations data of compounds

### 2.1 Synthesis of indol-linked 3-methyleneisindolin-1-ones **1**<sup>[1]</sup> and racemic isoindolinone fused tetrahydro $\beta$ -carbolines **2**.

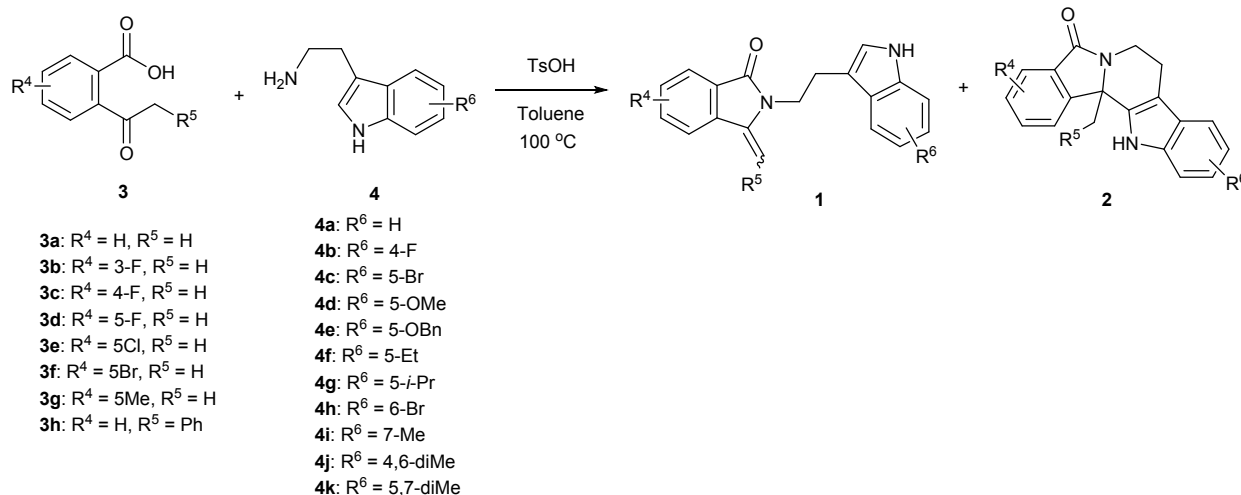

2-Acetylbenzoic acid derivative **3** (**3b**, **3c**, **3d**, **3f** and **3g**) were prepared according to literature procedures<sup>[2,3]</sup> (1.0 equiv.), tryptamine derivative **4** (**4f**, **4i** and **4k**) were prepared according to a literature procedure<sup>[4]</sup> (1.5 equiv. and TsOH (10 mol%) were dissolved in toluene in a round-bottomed flask equipped with a magnetic stirring bar. The reaction mixture was stirred under 100 °C until the reaction was completed as determined by TLC. The solvent was removed in vacuo, and the residue was subjected to column chromatography on a silica gel (petroleum ether : ethyl acetate = 10:1 to petroleum ether : DCM : ethyl acetate = 1:2:1) to afford the products **1a-1r** and racemic products **2a-2r**.

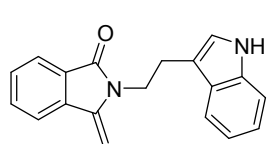

**2-(2-(1H-indol-3-yl)ethyl)-3-methyleneisindolin-1-one (1a):** white solid,

48% yield. m.p: 151.8-157.2 °C. <sup>1</sup>H NMR (300 MHz, CDCl<sub>3</sub>)  $\delta$  8.38 (s, 1H),

7.86 (d, *J* = 7.4 Hz, 1H), 7.79-7.64 (m, 2H), 7.58 (t, *J* = 7.4 Hz, 1H), 7.50 (t, *J*

= 7.3 Hz, 1H), 7.38 (d, *J* = 7.8 Hz, 1H), 7.30-7.10 (m, 2H), 7.06 (s, 1H), 5.22 (d, *J* = 2.0 Hz, 1H),

4.92 (d, *J* = 1.9 Hz, 1H), 4.11 (t, *J* = 7.8 Hz, 2H), 3.17 (t, *J* = 7.8 Hz, 2H). <sup>13</sup>C NMR (75 MHz, CDCl<sub>3</sub>)

$\delta$  167.09, 141.69, 136.30, 136.24, 131.78, 129.38, 127.32, 122.92, 122.12, 121.93, 119.80, 119.31,

118.51, 112.48, 111.26, 88.83, 40.11, 24.18. HRMS (ESI) Calcd for C<sub>19</sub>H<sub>16</sub>N<sub>2</sub>O<sup>+</sup> [M+H]<sup>+</sup> 289.1335;

Found: 289.1332.

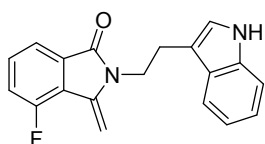

**2-(2-(1H-indol-3-yl)ethyl)-4-fluoro-3-methyleneisoindolin-1-one (1b):** yellow

solid, 27% yield. m.p: 144.2-146.8 °C. <sup>1</sup>H NMR (300 MHz, CDCl<sub>3</sub>) δ 8.26 (s, 1H), 7.68 (dd, *J* = 13.7, 7.6 Hz, 2H), 7.46 (td, *J* = 7.8, 4.5 Hz, 1H), 7.37 (d, *J* =

7.7 Hz, 1H), 7.32-7.21 (m, 2H), 7.19-7.12 (m, 1H), 7.07 (d, *J* = 2.2 Hz, 1H), 5.48 (d, *J* = 2.0 Hz, 1H), 5.10 (d, *J* = 1.8 Hz, 1H), 4.24-3.93 (m, 2H), 3.16 (t, *J* = 7.8 Hz, 2H). <sup>13</sup>C NMR (75 MHz, CDCl<sub>3</sub>) δ 166.02, 157.7 (d, *J* = 254.3 Hz), 138.52 (d, *J* = 3.6 Hz), 136.26, 132.44, 130.84 (d, *J* = 7.0 Hz), 127.31, 122.10, 122.03, 119.42, 119.12, 119.08, 119.06 (d, *J* = 20.0 Hz), 118.50, 112.42, 111.25, 94.61 (d, *J* = 7.5 Hz), 40.03, 24.11. HRMS (ESI) Calcd for C<sub>19</sub>H<sub>15</sub>FN<sub>2</sub>OH<sup>+</sup> [M+H]<sup>+</sup> 307.1241; Found: 307.1239.

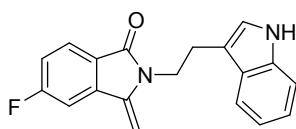

**2-(2-(1H-indol-3-yl)ethyl)-5-fluoro-3-methyleneisoindolin-1-one (1c):**

yellow solid, 32% yield. m.p: 131.2-134.7 °C. <sup>1</sup>H NMR (300 MHz, CDCl<sub>3</sub>) δ 8.19 (s, 1H), 7.81 (dd, *J* = 8.3, 4.9 Hz, 1H), 7.69 (d, *J* = 7.8 Hz, 1H),

7.43-7.29 (m, 2H), 7.26-7.11 (m, 3H), 7.07 (d, *J* = 2.0 Hz, 1H), 5.16 (d, *J* = 2.5 Hz, 1H), 4.91 (d, *J* = 2.5 Hz, 1H), 4.08 (t, *J* = 7.8 Hz, 2H), 3.15 (t, *J* = 7.8 Hz, 2H). <sup>13</sup>C NMR (75 MHz, CDCl<sub>3</sub>) δ 166.13, 165.46 (d, *J* = 249.8 Hz), 141.00 (d, *J* = 3.1 Hz), 136.25, 127.35, 125.50, 125.48, 125.10 (d, *J* = 9.8 Hz), 122.07, 119.44, 118.52, 117.25, 116.94, 112.55, 111.24, 107.13 (d, *J* = 24.0 Hz), 89.72, 40.31, 24.14. HRMS (ESI) Calcd for C<sub>19</sub>H<sub>15</sub>FN<sub>2</sub>OH<sup>+</sup> [M+H]<sup>+</sup> 307.1241; Found: 307.1242.

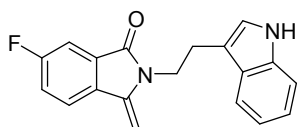

**2-(2-(1H-indol-3-yl)ethyl)-6-fluoro-3-methyleneisoindolin-1-one (1d):**

yellow solid, 28% yield. m.p: 150.1-152.4 °C. <sup>1</sup>H NMR (300 MHz, CDCl<sub>3</sub>) δ 8.15 (s, 1H), 7.74-7.59 (m, 2H), 7.50 (dd, *J* = 7.4, 2.1 Hz, 1H), 7.37 (d, *J* =

7.9 Hz, 1H), 7.33-7.10 (m, 3H), 7.07 (d, *J* = 1.1 Hz, 1H), 5.15 (d, *J* = 2.2 Hz, 1H), 4.89 (d, *J* = 2.2 Hz, 1H), 4.09 (t, *J* = 7.8 Hz, 2H), 3.15 (t, *J* = 7.8 Hz, 2H). <sup>13</sup>C NMR (75 MHz, CDCl<sub>3</sub>) δ 165.86, 163.65 (d, *J* = 248.3 Hz), 140.97, 136.24, 131.47 (d, *J* = 9.0 Hz), 127.34, 122.08, 121.72, 121.61, 119.53, 119.45, 119.21, 118.52, 112.55, 111.23, 109.80 (d, *J* = 23.8 Hz), 88.98, 40.36, 24.19. HRMS (ESI) Calcd for C<sub>19</sub>H<sub>15</sub>FN<sub>2</sub>OH<sup>+</sup> [M+H]<sup>+</sup> 307.1241; Found: 307.1233.

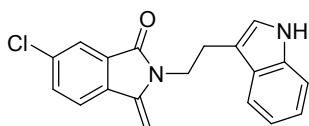

**2-(2-(1H-indol-3-yl)ethyl)-6-chloro-3-methyleneisoindolin-1-one (1e):**

white solid, 36% yield. m.p: 155.7-157.9 °C. <sup>1</sup>H NMR (300 MHz, CDCl<sub>3</sub>)



$\delta$  8.12 (s, 1H), 7.80 (d,  $J = 1.6$  Hz, 1H), 7.68 (d,  $J = 7.7$  Hz, 1H), 7.60 (d,  $J = 8.1$  Hz, 1H), 7.53 (dd,  $J = 8.2, 1.8$  Hz, 1H), 7.37 (d,  $J = 8.0$  Hz, 1H), 7.30-7.09 (m, 2H), 7.06 (d,  $J = 2.0$  Hz, 1H), 5.17 (d,  $J = 2.5$  Hz, 1H), 4.90 (d,  $J = 2.5$  Hz, 1H), 4.08 (t,  $J = 7.8$  Hz, 2H), 3.14 (t,  $J = 7.8$  Hz, 2H).  $^{13}\text{C}$  NMR (75 MHz,  $\text{CDCl}_3$ )  $\delta$  165.73, 140.98, 136.24, 135.62, 134.53, 131.96, 130.97, 127.33, 123.17, 122.10, 122.06, 121.14, 119.47, 118.51, 112.53, 111.23, 89.58, 40.33, 24.15. HRMS (ESI) Calcd for  $\text{C}_{19}\text{H}_{15}\text{ClN}_2\text{OH}^+$   $[\text{M}+\text{H}]^+$  323.0946 ( $^{35}\text{Cl}$ ), 325.0916 ( $^{37}\text{Cl}$ ); Found: 323.0939 ( $^{35}\text{Cl}$ ), 325.0925 ( $^{37}\text{Cl}$ ).

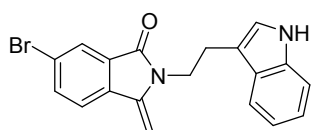

**(2-(1H-indol-3-yl)ethyl)-6-bromo-3-methyleneisoindolin-1-one (1f):**

yellow solid, 16% yield. m.p: 164.4-166.2 °C.  $^1\text{H}$  NMR (300 MHz,  $\text{CDCl}_3$ )  $\delta$  8.15 (s, 1H), 7.96 (s, 1H), 7.68 (dd,  $J = 8.0, 1.4$  Hz, 1H), 7.53 (d,  $J = 8.1$  Hz, 1H), 7.37 (d,  $J = 8.1$  Hz, 1H), 7.30-7.09 (m, 1H), 7.06 (s, 1H), 5.18 (d,  $J = 2.4$  Hz, 1H), 4.91 (d,  $J = 2.4$  Hz, 1H), 4.07 (t,  $J = 7.8$  Hz, 1H), 3.14 (t,  $J = 7.8$  Hz, 1H).  $^{13}\text{C}$  NMR (75 MHz,  $\text{CDCl}_3$ )  $\delta$  165.61, 140.99, 136.22, 134.93, 134.74, 131.12, 127.30, 126.14, 123.49, 122.05, 121.37, 119.43, 118.47, 112.43, 111.24, 89.74, 40.30, 24.12. HRMS (ESI) Calcd for  $\text{C}_{19}\text{H}_{15}\text{BrN}_2\text{OH}^+$   $[\text{M}+\text{H}]^+$  367.0441 ( $^{79}\text{Br}$ ), 369.0420 ( $^{81}\text{Br}$ ); Found: 367.0435 ( $^{79}\text{Br}$ ), 369.0417 ( $^{81}\text{Br}$ ).

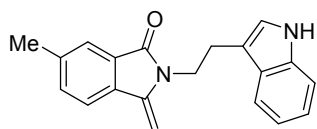

**(2-(1H-indol-3-yl)ethyl)-6-methyl-3-methyleneisoindolin-1-one (1g):**

white solid, 44% yield. m.p: 202.4-205.4 °C.  $^1\text{H}$  NMR (300 MHz,  $\text{CDCl}_3$ )  $\delta$  8.19 (s, 1H), 7.71 (d,  $J = 7.7$  Hz, 1H), 7.64 (s, 1H), 7.57 (d,  $J = 7.8$  Hz, 1H), 7.37 (dd,  $J = 7.7, 4.1$  Hz, 2H), 7.31-7.10 (m, 2H), 7.07 (d,  $J = 2.1$  Hz, 1H), 5.14 (d,  $J = 2.2$  Hz, 1H), 4.84 (d,  $J = 2.2$  Hz, 1H), 4.19-3.95 (m, 2H), 3.27-3.02 (m, 2H), 2.47 (s, 3H).  $^{13}\text{C}$  NMR (75 MHz,  $\text{CDCl}_3$ )  $\delta$  167.23, 141.83, 139.80, 136.27, 133.91, 132.78, 129.67, 127.41, 123.22, 122.06, 122.02, 119.64, 119.41, 118.62, 112.77, 111.20, 87.99, 40.11, 24.22, 21.55. HRMS (ESI) Calcd for  $\text{C}_{20}\text{H}_{18}\text{N}_2\text{OH}^+$   $[\text{M}+\text{H}]^+$  303.1492; Found: 303.1495.

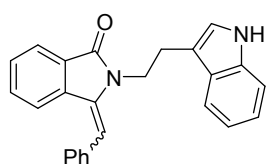

**2-(2-(1H-indol-3-yl)ethyl)-3-benzylideneisoindolin-1-one (1h):** white solid,

54% yield. m.p: 183.7-184.4 °C.  $^1\text{H}$  NMR (300 MHz,  $\text{CDCl}_3$ )  $\delta$  8.05 (s, 1H), 7.91 (d,  $J = 7.5$  Hz, 1H), 7.78 (d,  $J = 7.7$  Hz, 1H), 7.63 (td,  $J = 7.5, 1.0$  Hz, 1H), 7.52 (t,  $J = 7.1$  Hz, 1H), 7.47-7.32 (m, 5H), 7.30-7.23 (m, 1H), 7.21 (d,  $J = 7.9$  Hz, 1H), 7.13 (t,  $J = 7.1$  Hz, 1H), 7.04-6.96 (m, 1H), 6.98 (s, 1H), 6.48 (d,  $J = 2.1$  Hz, 1H), 4.11-3.94 (m, 2H),

2.84-2.57 (m, 2H).<sup>13</sup>C NMR (75 MHz, CDCl<sub>3</sub>) δ 168.81, 138.46, 135.91, 134.96, 134.63, 131.88, 129.70, 128.94, 128.43, 128.30, 127.52, 127.15, 123.12, 121.86, 121.69, 119.28, 119.08, 118.79, 112.20, 110.83, 106.59, 42.23, 24.14. HRMS (ESI) Calcd for C<sub>25</sub>H<sub>20</sub>N<sub>2</sub>O<sup>+</sup> [M+H]<sup>+</sup> 365.1648; Found: 365.1643.

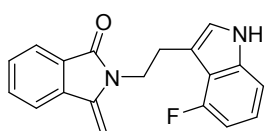

**2-(2-(4-fluoro-1H-indol-3-yl)ethyl)-3-methyleneisoindolin-1-one (1i):**

yellow solid, 37% yield. m.p: 146.5-148.3 °C. <sup>1</sup>H NMR (300 MHz, CDCl<sub>3</sub>) δ 8.31 (s, 1H), 7.84 (d, *J* = 7.5 Hz, 1H), 7.77-7.43 (m, 4H), 7.35 (d, *J* = 7.5 Hz, 1H), 7.14 (s, 1H), 7.01 (t, *J* = 7.9 Hz, 1H), 5.19 (s, 1H), 4.86 (s, 1H), 4.08 (t, *J* = 7.6 Hz, 2H), 3.13 (t, *J* = 7.6 Hz, 2H).<sup>13</sup>C NMR (75 MHz, CDCl<sub>3</sub>) δ 167.05, 141.72, 136.31, 134.91, 131.83, 129.44, 129.33, 128.61, 124.40, 123.02, 122.66, 120.61, 119.82, 117.89, 114.01, 104.80, 88.64, 39.97, 24.30. HRMS (ESI) Calcd for C<sub>19</sub>H<sub>15</sub>FN<sub>2</sub>O<sup>+</sup> [M+H]<sup>+</sup> 307.1241; Found: 307.1244.

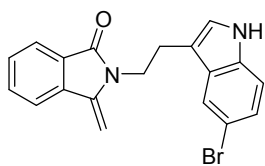

**2-(2-(5-bromo-1H-indol-3-yl)ethyl)-3-methyleneisoindolin-1-one (1j):**

white solid, 17% yield. m.p: 173.0-174.3 °C. <sup>1</sup>H NMR (300 MHz, DMSO-d<sub>6</sub>) δ 11.03 (s, 1H), 7.96 (d, *J* = 7.6 Hz, 1H), 7.73-7.65 (m, 3H), 7.56 (t, *J* = 7.4 Hz, 1H), 7.31-7.24 (m, 2H), 7.15 (dd, *J* = 8.7, 1.7 Hz, 1H), 5.46 (d, *J* = 2.0 Hz, 1H), 5.08 (d, *J* = 2.2 Hz, 1H), 3.99 (t, *J* = 7.5 Hz, 2H), 2.99 (t, *J* = 7.3 Hz, 2H).<sup>13</sup>C NMR (75 MHz, DMSO-d<sub>6</sub>) δ 165.91, 140.81, 136.03, 134.84, 132.18, 129.64, 129.10, 128.60, 124.75, 123.39, 122.38, 120.56, 120.46, 113.39, 111.06, 110.93, 90.27, 23.51. HRMS (ESI) Calcd for C<sub>19</sub>H<sub>15</sub>BrN<sub>2</sub>O<sup>+</sup> [M+H]<sup>+</sup> 367.0441 (<sup>79</sup>Br), 369.0420 (<sup>81</sup>Br); Found: 367.0430 (<sup>79</sup>Br), 369.0412 (<sup>81</sup>Br).

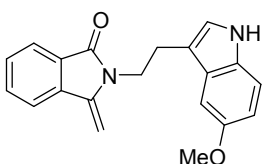

**2-(2-(5-methoxy-1H-indol-3-yl)ethyl)-3-methyleneisoindolin-1-one (1k):**

white solid, 48% yield. m.p: 158.9-163.3 °C. <sup>1</sup>H NMR (300 MHz, CDCl<sub>3</sub>) δ 8.16 (s, 1H), 7.84 (d, *J* = 7.3 Hz, 1H), 7.68 (d, *J* = 7.5 Hz, 1H), 7.57 (td, *J* = 7.4, 1.1 Hz, 1H), 7.49 (td, *J* = 7.4, 1.0 Hz, 1H), 7.29-7.19 (m, 1H), 7.12 (d, *J* = 2.2 Hz, 1H), 7.04 (d, *J* = 2.0 Hz, 1H), 6.85 (dd, *J* = 8.8, 2.4 Hz, 1H), 5.18 (d, *J* = 2.2 Hz, 1H), 4.87 (d, *J* = 2.2 Hz, 1H), 4.09 (t, *J* = 7.8 Hz, 2H), 3.83 (s, 3H), 3.12 (t, *J* = 7.7 Hz, 2H).<sup>13</sup>C NMR (75 MHz, CDCl<sub>3</sub>) δ 167.11,

153.94, 141.76, 136.33, 131.79, 131.39, 129.40, 127.78, 122.94, 122.82, 119.80, 112.40, 112.20, 111.95, 100.34, 88.73, 55.79, 40.08, 24.23. HRMS (ESI) Calcd for  $C_{20}H_{18}N_2O_2H^+$   $[M+H]^+$  319.1441; Found: 319.1438.

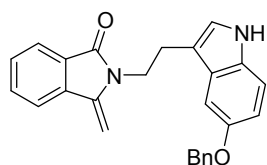

**2-(2-(5-(benzyloxy)-1H-indol-3-yl)ethyl)-3-methyleneisoindolin-1-one (1l):**

white solid, 56% yield. m.p: 160.3-162.4 °C.  $^1H$  NMR (300 MHz,  $CDCl_3$ )  $\delta$  8.10 (s, 1H), 7.82 (d,  $J = 7.3$  Hz, 1H), 7.66 (d,  $J = 7.5$  Hz, 1H), 7.55 (td,  $J =$

7.4, 1.0 Hz, 1H), 7.51-7.43 (m, 3H), 7.40-7.35 (m, 2H), 7.34-7.27 (m, 1H), 7.22 (d,  $J = 9.0$  Hz, 1H), 7.17 (d,  $J = 2.2$  Hz, 1H), 7.01 (d,  $J = 2.0$  Hz, 1H), 6.91 (dd,  $J = 8.8, 2.3$  Hz, 1H), 5.14 (d,  $J = 2.3$  Hz, 1H), 5.04 (s, 2H), 4.80 (d,  $J = 2.3$  Hz, 1H), 4.04 (t,  $J = 7.7$  Hz, 2H), 3.08 (t,  $J = 7.7$  Hz, 2H).  $^{13}C$  NMR (75 MHz,  $CDCl_3$ )  $\delta$  167.08, 153.14, 141.74, 137.62, 136.34, 131.80, 131.54, 129.41, 128.44, 127.78, 127.72, 127.66, 122.97, 122.90, 119.81, 112.94, 112.52, 111.93, 102.02, 88.76, 70.86, 40.12, 24.22. HRMS (ESI) Calcd for  $C_{26}H_{22}N_2O_2H^+$   $[M+H]^+$  395.1754; Found: 395.1749.

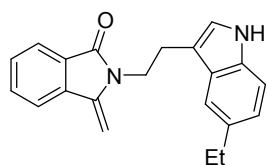

**2-(2-(5-ethyl-1H-indol-3-yl)ethyl)-3-methyleneisoindolin-1-one (1m):** white

solid, 21% yield. m.p: 263.8-265.3 °C.  $^1H$  NMR (300 MHz,  $CDCl_3$ )  $\delta$  8.08 (s, 1H), 7.84 (d,  $J = 7.3$  Hz, 1H), 7.68 (d,  $J = 7.5$  Hz, 1H), 7.57 (t,  $J = 7.3$  Hz, 1H),

7.53-7.43 (m, 2H), 7.27 (d,  $J = 8.5$  Hz, 2H), 7.09-6.99 (m, 2H), 5.20 (d,  $J = 2.2$  Hz, 1H), 4.89 (d,  $J = 2.2$  Hz, 1H), 4.08 (t,  $J = 7.8$  Hz, 2H), 3.13 (t,  $J = 7.8$  Hz, 2H), 2.74 (dd,  $J = 15.2, 7.7$  Hz, 2H), 1.27 (t,  $J = 7.5$  Hz, 3H).  $^{13}C$  NMR (75 MHz,  $CDCl_3$ )  $\delta$  167.12, 141.80, 136.36, 135.40, 134.72, 131.78, 129.40, 127.59, 122.99, 122.60, 122.17, 119.80, 116.98, 112.42, 110.97, 88.77, 40.22, 29.02, 24.20, 16.48. HRMS (ESI) Calcd for  $C_{21}H_{20}N_2OH^+$   $[M+H]^+$  316.1576; Found: 316.1573.

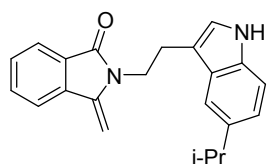

**2-(2-(5-isopropyl-1H-indol-3-yl)ethyl)-3-methyleneisoindolin-1-one (1n):**

white solid, 32% yield. m.p: 121.4-124.7 °C.  $^1H$  NMR (300 MHz,  $CDCl_3$ )  $\delta$  8.14 (s, 1H), 7.85 (d,  $J = 7.4$  Hz, 1H), 7.69 (d,  $J = 7.5$  Hz, 1H), 7.58 (td,  $J =$

7.4, 1.1 Hz, 1H), 7.53-7.48 (m, 2H), 7.29 (d,  $J = 8.4$  Hz, 1H), 7.09 (dd,  $J = 8.4, 1.4$  Hz, 1H), 7.05 (d,  $J = 2.1$  Hz, 1H), 5.21 (d,  $J = 2.3$  Hz, 1H), 4.91 (d,  $J = 2.2$  Hz, 1H), 4.13-4.08 (m, 2H), 3.18-3.13 (m, 2H), 3.00 (dq,  $J = 13.7, 6.8$  Hz, 1H), 1.30 (d,  $J = 6.9$  Hz, 6H).  $^{13}C$  NMR (75 MHz,  $CDCl_3$ )  $\delta$  167.11,

141.79, 140.07, 136.35, 134.78, 131.77, 129.39, 127.45, 122.97, 122.17, 121.17, 119.79, 115.36, 112.49, 110.99, 88.74, 40.24, 34.19, 24.63, 24.17. HRMS (ESI) Calcd for  $C_{22}H_{22}N_2OH^+$   $[M+H]^+$  331.1805; Found: 331.1799.

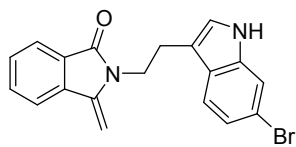

**2-(2-(6-bromo-1H-indol-3-yl)ethyl)-3-methyleneisoindolin-1-one (1o):**

white solid, 23% yield. m.p: 149.5-152.6 °C.  $^1H$  NMR (300 MHz,  $CDCl_3$ )  $\delta$  8.19 (s, 1H), 7.82 (d,  $J = 7.4$  Hz, 1H), 7.68 (d,  $J = 7.5$  Hz, 1H), 7.62-7.44 (m, 4H), 7.20 (dd,  $J = 8.4, 1.5$  Hz, 1H), 7.04 (d,  $J = 2.1$  Hz, 1H), 5.18 (d,  $J = 2.3$  Hz, 1H), 4.84 (d,  $J = 2.3$  Hz, 1H), 4.06 (t,  $J = 7.6$  Hz, 2H), 3.11 (t,  $J = 7.6$  Hz, 2H).  $^{13}C$  NMR (75 MHz,  $CDCl_3$ )  $\delta$  167.12, 141.76, 137.02, 136.32, 131.88, 129.48, 129.33, 126.37, 123.02, 122.73, 122.66, 119.85, 115.62, 114.14, 112.99, 88.72, 40.01, 24.05. HRMS (ESI) Calcd for  $C_{20}H_{18}N_2OH^+$   $[M+H]^+$  303.1492; Found: 303.1495. HRMS (ESI) Calcd for  $C_{19}H_{15}BrN_2OH^+$   $[M+H]^+$  367.0441 ( $^{79}Br$ ), 369.0420 ( $^{81}Br$ ); Found: 367.0438 ( $^{79}Br$ ), 369.0419 ( $^{81}Br$ ).

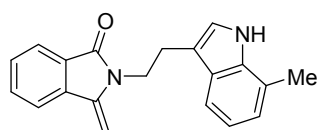

**2-(2-(7-methyl-1H-indol-3-yl)ethyl)-3-methyleneisoindolin-1-one (1p):**

white solid, 26% yield. m.p: 154.7-157.4 °C.  $^1H$  NMR (300 MHz,  $CDCl_3$ )  $\delta$  8.13 (s, 1H), 7.85 (d,  $J = 7.5$  Hz, 1H), 7.70 (d,  $J = 7.4$  Hz, 1H), 7.61-7.48 (m, 3H), 7.19-6.91 (m, 3H), 5.22 (s, 1H), 4.92 (s, 1H), 4.10 (t,  $J = 7.8$  Hz, 2H), 3.15 (t,  $J = 7.7$  Hz, 2H), 2.49 (s, 3H).  $^{13}C$  NMR (75 MHz,  $CDCl_3$ )  $\delta$  167.08, 141.75, 136.35, 135.83, 131.79, 129.41, 126.90, 122.99, 122.57, 121.81, 120.42, 119.82, 119.66, 116.31, 113.14, 88.79, 40.14, 24.33, 16.56. HRMS (ESI) Calcd for  $C_{20}H_{18}N_2OH^+$   $[M+H]^+$  303.1492; Found: 303.1486.

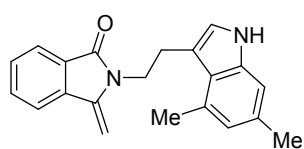

**2-(2-(4,6-dimethyl-1H-indol-3-yl)ethyl)-3-methyleneisoindolin-1-one**

**(1q):** white solid, 23% yield. m.p: 143.7-145.9 °C.  $^1H$  NMR (300 MHz,

$CDCl_3$ )  $\delta$  8.10 (s, 1H), 7.86 (d,  $J = 7.3$  Hz, 1H), 7.70 (d,  $J = 7.6$  Hz, 1H), 7.59 (td,  $J = 7.5, 1.2$  Hz, 1H), 7.55-7.46 (m, 1H), 7.33 (s, 1H), 7.05 (d,  $J = 2.1$  Hz, 1H), 6.86 (s, 1H), 5.22 (d,  $J = 2.3$  Hz, 1H), 4.93 (d,  $J = 2.2$  Hz, 1H), 4.12-4.07 (m, 2H), 3.13 (t,  $J = 7.8$  Hz, 2H), 2.45 (s, 3H), 2.44 (s, 3H).  $^{13}C$  NMR (75 MHz,  $CDCl_3$ )  $\delta$  167.06, 141.74, 136.36, 134.16, 131.76, 129.44,

129.37, 128.85, 127.16, 124.30, 122.95, 121.94, 120.07, 119.80, 115.86, 112.61, 88.80, 40.21, 24.33, 21.42, 16.49. HRMS (ESI) Calcd for  $C_{21}H_{20}N_2OH^+$   $[M+H]^+$  317.1648; Found: 317.1642.

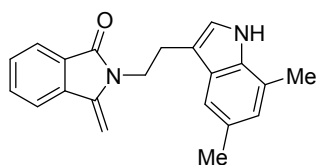

**2-(2-(5,7-dimethyl-1H-indol-3-yl)ethyl)-3-methyleneisoindolin-1-one**

**(1r):** white solid, 25% yield. m.p: 131.8-134.9 °C.  $^1H$  NMR (300 MHz,  $CDCl_3$ )  $\delta$  8.00 (s, 1H), 7.85 (d,  $J = 7.3$  Hz, 1H), 7.69 (d,  $J = 7.5$  Hz, 1H),

7.58 (td,  $J = 7.4, 1.1$  Hz, 1H), 7.55-7.45 (m, 1H), 7.08-6.87 (m, 2H), 6.73 (s, 1H), 5.18 (d,  $J = 2.3$  Hz, 1H), 4.85 (d,  $J = 2.3$  Hz, 1H), 4.10-4.05 (m, 2H), 3.38-3.17 (t,  $J = 7.9$  Hz, 2H), 2.77 (s, 3H), 2.41 (s, 3H).  $^{13}C$  NMR (75 MHz,  $CDCl_3$ )  $\delta$  167.07, 141.82, 137.17, 136.37, 131.87, 131.79, 130.22, 129.41, 123.63, 123.08, 123.00, 121.53, 119.81, 113.36, 108.99, 88.70, 41.30, 26.0, 21.39, 20.22. HRMS (ESI) Calcd for  $C_{21}H_{20}N_2OH^+$   $[M+H]^+$  317.1648; Found: 317.1642.

## 2.2 Enantioselective intramolecular Pictet-Spengler type annulation of isoindole-1-ones **1**.

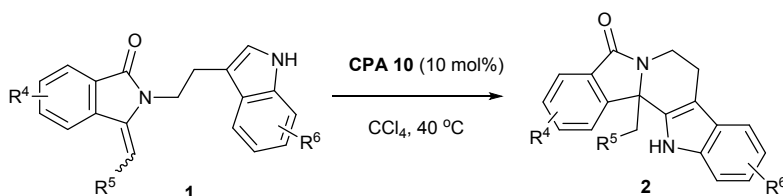

To a solution of **1** (0.1 mmol) in dry  $CCl_4$  (1.5 mL) was added **CPA10** (10 mol%). The mixture was stirred at 40 °C until the reaction was completed as determined by TLC. The solvent was removed in vacuo, and the residue was purified by column chromatography on a silica gel (petroleum : ethyl acetate = 10: 1 to petroleum : DCM : ethyl acetate = 1:2:1) to afford the product **2**.

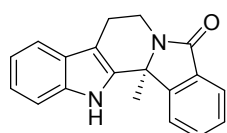

**13b-methyl-7,8,13,13b-tetrahydro-5H-benzo[1,2]indolizino[8,7-b]indol-5-one**

**(2a):** white solid, m.p: 313.3-315.2 °C, 92% yield, 96% ee, HPLC condition:

Chiralpak AD-H isopropyl alcohol/n-hexane:30/70, 1.0 mL/min,  $t_{minor} = 4.121$

min,  $t_{major} = 7.134$  min).  $[\alpha]_D^{20} = -164.5$  (c 1.0, ethanol).  $^1H$  NMR (300 MHz,  $DMSO-d_6$ )  $\delta$  11.37 (s, 1H), 8.32 (d,  $J = 7.8$  Hz, 1H), 7.72 (t,  $J = 6.0$  Hz, 2H), 7.52 (t,  $J = 7.3$  Hz, 1H), 7.38 (dd,  $J = 7.6, 2.8$  Hz, 2H), 7.09 (t,  $J = 7.3$  Hz, 1H), 6.97 (t,  $J = 7.4$  Hz, 1H), 4.52 (dd,  $J = 13.2, 5.0$  Hz, 1H), 3.43-3.38

(m, 1H), 2.93-2.57 (m, 2H), 1.85 (s, 3H).<sup>13</sup>C NMR (75 MHz, DMSO-*d*<sub>6</sub>)  $\delta$  167.25, 149.36, 136.19, 135.20, 132.28, 130.27, 128.66, 126.00, 123.22, 122.80, 121.65, 118.93, 118.37, 111.25, 106.38, 62.05, 35.47, 25.91, 21.49. HRMS (ESI) Calcd for C<sub>19</sub>H<sub>16</sub>N<sub>2</sub>OH<sup>+</sup> [M+H]<sup>+</sup>289.1335; Found: 289.1322.

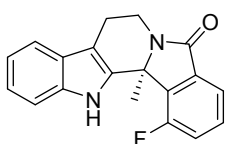

**1-fluoro-13b-methyl-7,8,13,13b-tetrahydro-5H-benzo[1,2]indolizino[8,7-b]in**

**dol-5-one(2b):** yellow solid, m.p: 321.9-323.4 °C, 52 % yield, 91% ee, HPLC condition: Chiralpak AD-H isopropyl alcohol/n-hexane:20/80, 1.0 mL/min,

$t_{\text{minor}} = 7.352$  min,  $t_{\text{major}} = 13.171$  min).  $[\alpha]_{\text{D}}^{20} = -142.5$  (c 1.0, ethanol). <sup>1</sup>H NMR (300 MHz, DMSO-*d*<sub>6</sub>)  $\delta$  10.61 (s, 1H), 7.68-7.52 (m, 3H), 7.47 (d,  $J = 8.0$  Hz, 1H), 7.39 (d,  $J = 7.8$  Hz, 1H), 7.09 (t,  $J = 7.6$  Hz, 1H), 6.98 (t,  $J = 7.4$  Hz, 1H), 4.52 (dd,  $J = 13.2, 5.2$  Hz, 1H), 3.45 (dd,  $J = 12.2, 5.4$  Hz, 1H), 2.93-2.60 (m, 2H), 1.93 (s, 3H). <sup>13</sup>C NMR (75 MHz, DMSO-*d*<sub>6</sub>)  $\delta$  165.88, 156.88 (d,  $J = 248.3$  Hz), 136.58, 134.32 (d,  $J = 16.72$  Hz), 133.90, 133.65 (d,  $J = 4.0$  Hz), 131.58 (d,  $J = 3.8$  Hz), 125.93, 121.82, 119.74 (d,  $J = 3.8$  Hz), 119.40 (d,  $J = 20.2$  Hz), 119.07, 118.26, 112.12, 107.28, 61.41, 35.56, 24.51, 21.46. HRMS (ESI) Calcd for C<sub>19</sub>H<sub>15</sub>FN<sub>2</sub>OH<sup>+</sup> [M+H]<sup>+</sup>307.1241; Found: 307.1234.

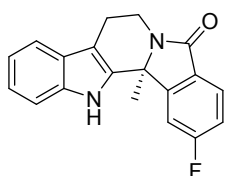

**2-fluoro-13b-methyl-7,8,13,13b-tetrahydro-5H-benzo[1,2]indolizino[8,7-b]in**

**dol-5-one(2c):** yellow solid, m.p: 323.6-324.9 °C, 86% yield, 95% ee, HPLC condition: Chiralpak AD-H isopropyl alcohol/n-hexane:10/90, 1.0 mL/min,  $t_{\text{minor}}$

$= 15.982$  min,  $t_{\text{major}} = 34.650$  min).  $[\alpha]_{\text{D}}^{20} = -142.9$  (c 1.0, ethanol). <sup>1</sup>H NMR (300 MHz, DMSO-*d*<sub>6</sub>)  $\delta$  11.35 (s, 1H), 8.22 (dd,  $J = 9.0, 2.2$  Hz, 1H), 7.77 (dd,  $J = 8.3, 5.1$  Hz, 1H), 7.45-7.27 (m, 3H), 7.10 (t,  $J = 7.6$  Hz, 1H), 6.98 (t,  $J = 7.5$  Hz, 1H), 4.50 (dd,  $J = 13.5, 5.3$  Hz, 1H), 3.43 (dd,  $J = 11.7, 4.5$  Hz, 1H), 2.94-2.59 (m, 2H), 1.85 (s, 3H). <sup>13</sup>C NMR (75 MHz, DMSO-*d*<sub>6</sub>)  $\delta$  166.19, 164.83 (d,  $J = 247.5$  Hz), 151.78 (d,  $J = 9.8$  Hz), 136.17, 134.45, 126.64, 125.92, 125.70 (d,  $J = 9.8$  Hz), 121.77, 118.98, 118.41, 116.31 (d,  $J = 23.3$  Hz), 111.26, 110.25 (d,  $J = 24.7$  Hz), 106.66, 61.85, 35.57, 25.77, 21.37. HRMS (ESI) Calcd for C<sub>19</sub>H<sub>15</sub>FN<sub>2</sub>OH<sup>+</sup> [M+H]<sup>+</sup>307.1241; Found: 307.1230.

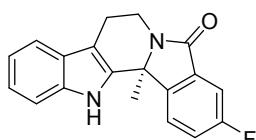

**3-fluoro-13b-methyl-7,8,13,13b-tetrahydro-5H-benzo[1,2]indolizino[8,7-b]**

**indol-5-one(2d):** yellow solid, m.p: 341.9-343.3 °C , 94% yield, 94% ee,

HPLC condition: Chiralpak AD-H isopropyl alcohol/n-hexane:20/80, 1.0 mL/min,  $t_{\text{minor}} = 5.451$  min,  $t_{\text{major}} = 12.187$  min).  $[\alpha]_{\text{D}}^{20} = -137.9$  (c 1.0, ethanol).  $^1\text{H NMR}$  (300 MHz, DMSO- $d_6$ )  $\delta$  11.38 (s, 1H), 8.36 (dd,  $J = 8.4, 4.5$  Hz, 1H), 7.60 (td,  $J = 9.0, 2.3$  Hz, 1H), 7.51 (dd,  $J = 7.8, 2.3$  Hz, 1H), 7.38 (dd,  $J = 7.9, 2.9$  Hz, 2H), 7.09 (t,  $J = 7.5$  Hz, 1H), 6.97 (t,  $J = 7.5$  Hz, 1H), 4.51 (dd,  $J = 13.1, 5.2$  Hz, 1H), 3.45 (d,  $J = 4.8$  Hz, 1H), 2.73 (dtd,  $J = 20.8, 15.5, 5.1$  Hz, 2H), 1.84 (s, 3H).  $^{13}\text{C NMR}$  (75 MHz, DMSO- $d_6$ )  $\delta$  166.09 (d,  $J = 3.2$  Hz), 162.47 (d,  $J = 243.8$  Hz), 145.24, 136.22, 134.95, 132.53 (d,  $J = 8.6$  Hz), 125.98, 124.94 (d,  $J = 8.5$  Hz), 121.76, 119.68 (d,  $J = 23.4$  Hz), 119.00, 118.44, 111.27, 109.77 (d,  $J = 23.4$  Hz), 106.41, 61.97, 35.67, 25.89, 21.5. HRMS (ESI) Calcd for  $\text{C}_{19}\text{H}_{15}\text{FN}_2\text{OH}^+$   $[\text{M}+\text{H}]^+307.1241$ ; Found: 307.1229.

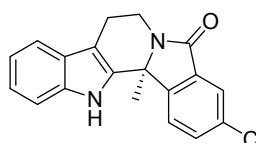

**3-chloro-13b-methyl-7,8,13,13b-tetrahydro-5H-benzo[1,2]indolizino[8,7-b]**

**indol-5-one(2e):** yellow solid, m.p: 335.9-338.4 °C, 94% yield, 88% ee, HPLC

condition: Chiralpak AD-H ethanol/n-hexane:30/70, 1.0 mL/min,  $t_{\text{minor}} = 3.671$  min,  $t_{\text{major}} = 4.296$  min).  $[\alpha]_{\text{D}}^{20} = -166.9$  (c 1.0, ethanol).  $^1\text{H NMR}$  (300 MHz, DMSO- $d_6$ )  $\delta$  11.37 (s, 1H), 8.35 (d,  $J = 8.2$  Hz, 1H), 7.81 (dd,  $J = 8.2, 2.0$  Hz, 1H), 7.73 (d,  $J = 1.9$  Hz, 1H), 7.38 (dd,  $J = 7.8, 5.2$  Hz, 2H), 7.10 (t,  $J = 7.1$  Hz, 1H), 6.98 (t,  $J = 7.5$  Hz, 1H), 4.51 (dd,  $J = 13.5, 5.1$  Hz, 1H), 3.43 (dd,  $J = 11.6, 5.0$  Hz, 1H), 2.91-2.60 (m, 2H), 1.84 (s, 3H).  $^{13}\text{C NMR}$  (75 MHz, DMSO- $d_6$ )  $\delta$  165.75, 147.84, 136.21, 134.57, 133.64, 132.30, 132.22, 125.94, 124.72, 122.94, 121.75, 118.97, 118.40, 111.25, 106.53, 62.05, 35.62, 25.72, 21.44. HRMS (ESI) Calcd for  $\text{C}_{19}\text{H}_{15}\text{ClN}_2\text{OH}^+$   $[\text{M}+\text{H}]^+323.0946$  ( $^{35}\text{Cl}$ ), 325.0916 ( $^{37}\text{Cl}$ ); Found: 323.0936 ( $^{35}\text{Cl}$ ), 325.0920 ( $^{37}\text{Cl}$ ).

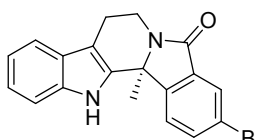

**3-bromo-13b-methyl-7,8,13,13b-tetrahydro-5H-benzo[1,2]indolizino[8,7-b]**

**indol-5-one(2f):** white solid, m.p: 343.1-345.0 °C, 97% yield, 89% ee, HPLC

condition: Chiralpak AD-H ethanol/n-hexane:30/70, 1.0 mL/min,  $t_{\text{minor}} = 3.735$  min,  $t_{\text{major}} = 4.327$  min).  $[\alpha]_{\text{D}}^{20} = -150.0$  (c 1.0, ethanol).  $^1\text{H NMR}$  (300 MHz, DMSO- $d_6$ )  $\delta$  11.39 (s, 1H), 8.29 (d,  $J = 8.2$  Hz, 1H), 7.94 (dd,  $J = 8.2, 1.8$  Hz, 1H), 7.86 (d,  $J = 1.7$  Hz, 1H), 7.38 (dd,  $J = 7.3, 5.8$  Hz, 2H), 7.10 (t,  $J = 7.6$  Hz, 1H), 6.98 (t,  $J = 7.4$  Hz, 1H), 4.50 (dd,  $J = 13.2, 5.2$  Hz, 1H),

3.46-3.44 (m, 1H), 2.88-2.58 (m, 2H), 1.84 (s, 3H).<sup>13</sup>C NMR (75 MHz, DMSO-*d*<sub>6</sub>)  $\delta$  165.69, 148.28, 136.22, 135.06, 134.53, 132.57, 129.55, 125.93, 125.09, 121.95, 121.80, 119.02, 118.45, 111.29, 106.58, 62.13, 35.66, 25.69, 21.49. HRMS (ESI) Calcd for C<sub>19</sub>H<sub>15</sub>BrN<sub>2</sub>OH<sup>+</sup> [M+H]<sup>+</sup> 367.0441 (<sup>79</sup>Br), 369.0420 (<sup>81</sup>Br); Found: 367.04328 (<sup>79</sup>Br), 369.0411 (<sup>81</sup>Br).

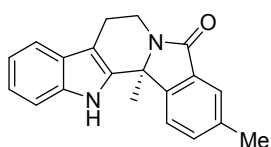

**3,13b-dimethyl-7,8,13,13b-tetrahydro-5H-benzo[1,2]indolizino[8,7-b]indo**

**l-5-one(2g):** white solid, m.p: 259.7-263.6 °C, 76% yield, 84% ee, HPLC

condition: Chiralpak AD-H isopropyl alcohol/n-hexane:30/70, 1.0 mL/min,

$t_{\text{minor}} = 5.958$  min,  $t_{\text{major}} = 14.497$  min).  $[\alpha]_{\text{D}}^{20} = -111.4$  (c 1.0, ethanol). <sup>1</sup>H NMR (300 MHz, DMSO-*d*<sub>6</sub>)  $\delta$  11.31 (s, 1H), 8.18 (d,  $J = 8.3$  Hz, 1H), 7.52 (d,  $J = 3.8$  Hz, 2H), 7.37 (dd,  $J = 7.7, 2.6$  Hz, 2H), 7.08 (t,  $J = 7.6$  Hz, 1H), 6.97 (t,  $J = 7.5$  Hz, 1H), 4.51 (dd,  $J = 13.4, 5.4$  Hz, 1H), 3.41-3.37 (m, 1H), 2.94-2.55 (m, 2H), 2.38 (s, 3H), 1.82 (s, 3H).<sup>13</sup>C NMR (75 MHz, DMSO-*d*<sub>6</sub>)  $\delta$  167.29, 146.73, 138.27, 136.16, 135.41, 132.98, 130.44, 125.99, 123.21, 122.49, 121.54, 118.84, 118.29, 111.18, 106.15, 61.76, 54.91, 35.41, 25.95, 21.45, 20.77. HRMS (ESI) Calcd for C<sub>20</sub>H<sub>18</sub>N<sub>2</sub>OH<sup>+</sup> [M+H]<sup>+</sup> 303.1492; Found: 303.1492.

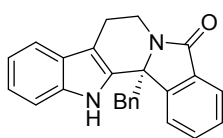

**13b-benzyl-7,8,13,13b-tetrahydro-5H-benzo[1,2]indolizino[8,7-b]indol-5-one**

**(2h):** white solid, m.p: 241.3-243.7 °C, 53% yield, 22% ee, HPLC condition:

Chiralpak AD-H isopropyl alcohol/n-hexane:20/80, 1.0 mL/min,  $t_{\text{minor}} = 6.090$

min,  $t_{\text{major}} = 13.146$  min).  $[\alpha]_{\text{D}}^{20} = -56.3$  (c 1.0, ethanol). <sup>1</sup>H NMR (300 MHz, DMSO-*d*<sub>6</sub>)  $\delta$  11.53 (s, 1H), 8.46 (d,  $J = 7.6$  Hz, 1H), 7.70 (t,  $J = 7.4$  Hz, 1H), 7.57-7.28 (m, 4H), 7.13 (t,  $J = 7.5$  Hz, 1H), 7.09-6.93 (m, 4H), 6.82 (bs, 2H), 4.54 (dd,  $J = 13.1, 5.2$  Hz, 1H), 3.80-3.55 (m, 2H), 3.46-3.40 (m, 1H), 2.97-2.57 (m, 2H).<sup>13</sup>C NMR (75 MHz, DMSO-*d*<sub>6</sub>)  $\delta$  167.62, 146.91, 136.27, 134.96, 134.51, 131.72, 131.07, 129.78, 128.45, 127.53, 126.50, 126.01, 123.36, 122.82, 121.72, 118.96, 118.39, 111.32, 107.03, 65.55, 42.99, 35.65, 21.50. HRMS (ESI) Calcd for C<sub>25</sub>H<sub>20</sub>N<sub>2</sub>OH<sup>+</sup> [M+H]<sup>+</sup> 365.1648; Found: 365.1643.

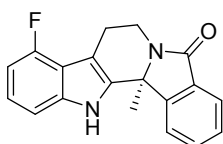

**9-fluoro-13b-methyl-7,8,13,13b-tetrahydro-5H-benzo[1,2]indolizino[8,7-b]in**

**dol-5-one(2i):** white solid, m.p: 153.3-156.1 °C, 81% yield, 70% ee, HPLC



condition: Chiralpak AD-H isopropyl alcohol/n-hexane:10/90, 1.0 mL/min,  $t_{\text{minor}} = 16.450$  min,  $t_{\text{major}} = 19.763$  min).  $[\alpha]_{\text{D}}^{20} = -117.5$  (c 1.0, ethanol).  $^1\text{H NMR}$  (300 MHz,  $\text{DMSO-}d_6$ )  $\delta$  11.67 (s, 1H), 8.30 (d,  $J = 7.9$  Hz, 1H), 7.72 (t,  $J = 6.3$  Hz, 2H), 7.53 (t,  $J = 7.4$  Hz, 1H), 7.21 (d,  $J = 8.2$  Hz, 1H), 7.03 (td,  $J = 8.0, 5.4$  Hz, 1H), 6.71 (dd,  $J = 11.0, 7.8$  Hz, 1H), 4.50 (dd,  $J = 13.3, 5.1$  Hz, 1H), 3.46-3.40 (m, 1H), 3.03-2.70 (m, 2H), 1.85 (s, 3H).  $^{13}\text{C NMR}$  (75 MHz,  $\text{DMSO-}d_6$ )  $\delta$  167.18, 156.33 (d,  $J = 243.7$  Hz), 149.06, 138.82 (d,  $J = 11.9$  Hz), 135.46, 132.37, 130.25, 128.79, 123.28, 122.78, 122.16 (d,  $J = 7.7$  Hz), 107.89 (d,  $J = 3.0$  Hz), 104.31, 104.01, 104.77, 61.87, 35.39, 25.88, 22.81. HRMS (ESI) Calcd for  $\text{C}_{19}\text{H}_{15}\text{FN}_2\text{OH}^+$   $[\text{M}+\text{H}]^+ 307.1241$ ; Found: 307.1234.

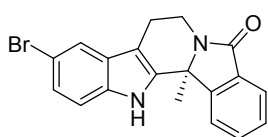

**10-bromo-13b-methyl-7,8,13,13b-tetrahydro-5H-benzo[1,2]indolizino[8,7-b]indol-5-one(2j):** yellow solid, m.p: 161.4-163.5 °C, 86% yield, 85% ee,

HPLC condition: Chiralpak AD-H isopropyl alcohol/n-hexane:10/90, 1.0 mL/min,  $t_{\text{minor}} = 19.434$  min,  $t_{\text{major}} = 47.258$  min).  $[\alpha]_{\text{D}}^{20} = -34.5$  (c 1.0, ethanol).  $^1\text{H NMR}$  (300 MHz,  $\text{DMSO-}d_6$ )  $\delta$  11.58 (s, 1H), 8.29 (d,  $J = 8.0$  Hz, 1H), 7.72 (dt,  $J = 4.0, 3.1$  Hz, 2H), 7.59 (d,  $J = 1.7$  Hz, 1H), 7.53 (t,  $J = 7.4$  Hz, 1H), 7.34 (d,  $J = 8.6$  Hz, 1H), 7.20 (dd,  $J = 8.6, 1.9$  Hz, 1H), 4.51 (dd,  $J = 13.3, 5.3$  Hz, 1H), 3.41 (dd,  $J = 11.8, 4.7$  Hz, 1H), 2.99-2.57 (m, 2H), 1.84 (s, 3H).  $^{13}\text{C NMR}$  (75 MHz,  $\text{DMSO-}d_6$ )  $\delta$  167.12, 148.99, 136.80, 134.88, 132.30, 130.22, 128.72, 127.85, 124.04, 123.22, 122.72, 120.74, 113.21, 111.40, 106.35, 61.90, 35.28, 25.83, 21.29. HRMS (ESI) Calcd for  $\text{C}_{19}\text{H}_{15}\text{BrN}_2\text{OH}^+$   $[\text{M}+\text{H}]^+ 367.0441$  ( $^{79}\text{Br}$ ), 369.0420 ( $^{81}\text{Br}$ ); Found: 367.0438 ( $^{79}\text{Br}$ ), 369.0414 ( $^{81}\text{Br}$ ).

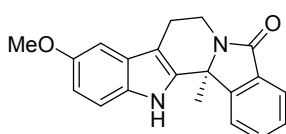

**10-methoxy-13b-methyl-7,8,13,13b-tetrahydro-5H-benzo[1,2]indolizino[8,7-b]indol-5-one(2k):** white solid, m.p: 130.3-131.9 °C, 96% yield, 91% ee, HPLC condition: Chiralpak AD-H isopropyl alcohol/n-hexane:30/70, 1.0

mL/min,  $t_{\text{minor}} = 4.332$  min,  $t_{\text{major}} = 5.804$  min).  $[\alpha]_{\text{D}}^{20} = -50.0$  (c 1.0, ethanol).  $^1\text{H NMR}$  (300 MHz,  $\text{DMSO-}d_6$ )  $\delta$  11.19 (s, 1H), 8.29 (d,  $J = 8.0$  Hz, 1H), 7.71 (t,  $J = 6.9$  Hz, 2H), 7.52 (t,  $J = 7.4$  Hz, 1H), 7.26 (d,  $J = 8.7$  Hz, 1H), 6.89 (d,  $J = 2.0$  Hz, 1H), 6.73 (dd,  $J = 8.8, 2.3$  Hz, 1H), 4.51 (dd,  $J = 13.2, 5.2$  Hz, 1H), 3.72 (s, 3H), 3.44-3.40 (m, 1H), 2.89-2.56 (m, 2H), 1.83 (s, 3H).  $^{13}\text{C NMR}$  (75 MHz,  $\text{DMSO-}d_6$ )  $\delta$  167.22, 153.38, 149.40, 135.81, 132.25, 131.22, 130.26, 128.63, 126.35, 123.20, 122.79, 111.94, 111.58, 106.22, 100.32, 62.08, 55.39, 35.49, 25.98, 21.57. HRMS (ESI) Calcd for  $\text{C}_{20}\text{H}_{18}\text{N}_2\text{O}_2\text{H}^+$   $[\text{M}+\text{H}]^+ 319.1441$ ; Found: 319.1436.

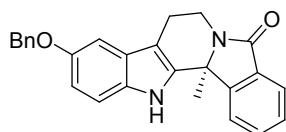

**10-(benzyloxy)-13b-methyl-7,8,13,13b-tetrahydro-5H-benzo[1,2]indolizino**

**no[8,7-b]indol-5-one(2l):** white solid, m.p: 110.4-113.7 °C, 98% yield, 93%

ee, HPLC condition: Chiralpak AD-H isopropyl alcohol/n-hexane:10/90, 1.0

mL/min,  $t_{\text{minor}} = 10.615$  min,  $t_{\text{major}} = 12.738$  min).  $[\alpha]_{\text{D}}^{20} = -41.0$  (c 1.0, ethanol).  $^1\text{H NMR}$  (300 MHz,  $\text{CDCl}_3$ )  $\delta$  9.14 (d,  $J = 14.8$  Hz, 1H), 8.01 (d,  $J = 5.9$  Hz, 1H), 7.88 (d,  $J = 7.4$  Hz, 1H), 7.57 (t,  $J = 7.0$  Hz, 1H), 7.45 (t,  $J = 5.2$  Hz, 3H), 7.43-7.29 (m, 3H), 7.26 (t,  $J = 4.3$  Hz, 2H), 7.01 (d,  $J = 2.0$  Hz, 1H), 6.90 (dd,  $J = 8.8, 2.3$  Hz, 1H), 4.83 (dd,  $J = 13.4, 5.6$  Hz, 1H), 3.45 (td,  $J = 13.1, 5.0$  Hz, 1H), 2.96 (ddd,  $J = 17.1, 11.4, 6.0$  Hz, 1H), 2.81 (dd,  $J = 15.5, 4.6$  Hz, 1H), 1.92 (s, 3H).  $^{13}\text{C NMR}$  (75 MHz,  $\text{CDCl}_3$ )  $\delta$  168.40, 153.37, 148.94, 137.49, 135.58, 132.18, 131.71, 130.88, 128.65, 128.45, 127.73, 127.49, 126.94, 124.17, 121.64, 113.09, 111.90, 107.72, 102.40, 70.95, 62.46, 35.75, 26.23, 21.87. HRMS (ESI) Calcd for  $\text{C}_{26}\text{H}_{22}\text{N}_2\text{O}_2\text{H}^+$   $[\text{M}+\text{H}]^+ 395.1754$ ; Found: 395.1748.

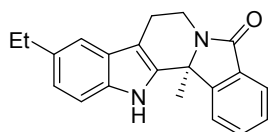

**10-ethyl-13b-methyl-7,8,13,13b-tetrahydro-5H-benzo[1,2]indolizino[8,7-b]i**

**ndol-5-one(2m):** white solid, m.p: 272.8-274.3 °C, 93% yield, 85% ee, HPLC

condition: Chiralpak AD-H isopropyl alcohol/n-hexane:20/80, 1.0 mL/min,

$t_{\text{minor}} = 7.131$  min,  $t_{\text{major}} = 8.256$  min).  $[\alpha]_{\text{D}}^{20} = -74.8$  (c 1.0, ethanol).  $^1\text{H NMR}$  (300 MHz,  $\text{DMSO}-d_6$ )  $\delta$  11.24 (s, 1H), 8.30 (d,  $J = 7.6$  Hz, 1H), 7.71 (t,  $J = 7.3$  Hz, 2H), 7.51 (t,  $J = 7.4$  Hz, 1H), 7.28 (d,  $J = 8.2$  Hz, 1H), 7.18 (s, 1H), 6.94 (d,  $J = 8.2$  Hz, 1H), 4.52 (dd,  $J = 13.3, 5.0$  Hz, 1H), 3.36 (dd,  $J = 13.0, 4.7$  Hz, 1H), 2.83-2.67 (m, 2H), 2.66-2.58 (m, 2H), 1.84 (s, 3H), 1.16 (t,  $J = 7.5$  Hz, 3H).  $^{13}\text{C NMR}$  (75 MHz,  $\text{DMSO}-d_6$ )  $\delta$  167.28, 149.45, 135.27, 134.74, 134.35, 132.27, 130.29, 128.64, 126.20, 123.22, 122.82, 122.14, 116.80, 111.07, 106.07, 62.11, 35.53, 28.51, 25.94, 21.54, 16.78. HRMS (ESI) Calcd for  $\text{C}_{21}\text{H}_{20}\text{N}_2\text{OH}^+$   $[\text{M}+\text{H}]^+ 317.1648$ ; Found: 317.1641.

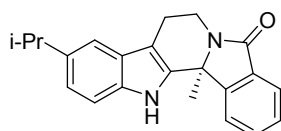

**10-isopropyl-13b-methyl-7,8,13,13b-tetrahydro-5H-benzo[1,2]indolizino[**

**8,7-b]indol-5-one(2n):** white solid, m.p: 280.8-284.3 °C, 95% yield, 85% ee,

HPLC condition: Chiralpak AD-H isopropyl alcohol/n-hexane:20/80, 1.0

mL/min,  $t_{\text{minor}} = 6.576$  min,  $t_{\text{major}} = 7.426$  min).  $[\alpha]_{\text{D}}^{20} = -50.9$  (c 1.0, ethanol).  $^1\text{H NMR}$  (300 MHz,  $\text{DMSO}-d_6$ )  $\delta$  11.20 (s, 1H), 8.31 (d,  $J = 7.6$  Hz, 1H), 7.71 (t,  $J = 7.3$  Hz, 2H), 7.51 (t,  $J = 7.4$  Hz, 1H), 7.29 (d,  $J = 8.3$  Hz, 1H), 7.21 (s, 1H), 6.99 (d,  $J = 7.1$  Hz, 1H), 4.52 (dd,  $J = 13.2, 5.1$  Hz, 1H),

3.43-3.41 (m, 1H), 2.91 (dt,  $J = 13.5, 6.8$  Hz, 1H), 2.84-2.60 (m, 2H), 1.84 (s, 3H), 1.20 (d,  $J = 6.9$  Hz, 6H).  $^{13}\text{C}$  NMR (75 MHz, DMSO- $d_6$ )  $\delta$  167.18, 149.40, 139.08, 135.24, 134.78, 132.16, 130.24, 128.53, 126.02, 123.13, 122.74, 120.60, 115.10, 110.98, 106.13, 62.02, 35.47, 33.58, 25.88, 24.62, 21.47. HRMS (ESI) Calcd for  $\text{C}_{22}\text{H}_{22}\text{N}_2\text{OH}^+$   $[\text{M}+\text{H}]^+$  331.1805; Found: 331.1795.

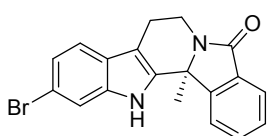

**11-bromo-13b-methyl-7,8,13,13b-tetrahydro-5H-benzo[1,2]indolizino[8,7-**

**b]indol-5-one(2o):** white solid, m.p: 144.9-148.3 °C, 97% yield, 85% ee,

HPLC condition: Chiralpak AD-H isopropyl alcohol/n-hexane:10/90, 1.0

mL/min,  $t_{\text{minor}} = 15.417$  min,  $t_{\text{major}} = 18.012$  min).  $[\alpha]_{\text{D}}^{20} = -155.0$  (c 1.0, ethanol).  $^1\text{H}$  NMR (300 MHz,

DMSO- $d_6$ )  $\delta$  11.58 (s, 1H), 8.28 (d,  $J = 7.8$  Hz, 1H), 7.75-7.70(m, 2H), 7.63-7.45 (m, 2H), 7.34 (d,  $J$

= 8.4 Hz, 1H), 7.10 (dd,  $J = 8.4, 1.7$  Hz, 1H), 4.51 (dd,  $J = 13.2, 5.4$  Hz, 1H), 3.37 (dd,  $J = 13.2, 4.9$

Hz, 1H), 2.92-2.55 (m, 2H), 1.84 (s, 3H).  $^{13}\text{C}$  NMR (75 MHz, DMSO- $d_6$ )  $\delta$  167.24, 149.05, 137.06,

136.23, 132.39, 130.27, 128.80, 125.10, 123.31, 122.78, 121.89, 120.21, 114.24, 113.81, 106.85,

61.97, 35.35, 25.83, 21.37. HRMS (ESI) Calcd for  $\text{C}_{19}\text{H}_{15}\text{BrN}_2\text{OH}^+$   $[\text{M}+\text{H}]^+$  367.0441 ( $^{79}\text{Br}$ ),

369.0420 ( $^{81}\text{Br}$ ); Found: 367.0433 ( $^{79}\text{Br}$ ), 369.0417 ( $^{81}\text{Br}$ ).

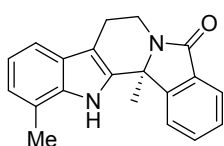

**12,13b-dimethyl-7,8,13,13b-tetrahydro-5H-benzo[1,2]indolizino[8,7-b]indol-**

**5-one(2p):** white solid, m.p: 164.6-168.3 °C, 94% yield, 88% ee, HPLC

condition: Chiralpak OD-H isopropyl alcohol/n-hexane:20/80, 1.0 mL/min,  $t_{\text{minor}}$

= 8.009 min,  $t_{\text{major}} = 9.449$  min).  $[\alpha]_{\text{D}}^{20} = -187.0$  (c 1.0, ethanol).  $^1\text{H}$  NMR (300 MHz, DMSO- $d_6$ )  $\delta$

10.92 (s, 1H), 8.50 (d,  $J = 7.7$  Hz, 1H), 7.73 (t,  $J = 7.5$  Hz, 2H), 7.52 (t,  $J = 7.4$  Hz, 1H), 7.34-7.10

(m, 1H), 6.88 (d,  $J = 4.5$  Hz, 2H), 4.51 (dd,  $J = 13.3, 5.0$  Hz, 1H), 3.35-3.32 (m, 1H), 2.79-2.65 (m,

2H), 2.51 (s, 3H), 1.89 (s, 3H).  $^{13}\text{C}$  NMR (75 MHz, DMSO- $d_6$ )  $\delta$  167.35, 149.65, 135.69, 135.06,

132.27, 130.23, 128.57, 125.74, 123.20, 123.12, 122.37, 120.54, 119.21, 115.91, 107.10, 62.34,

35.57, 25.81, 21.69, 17.18. HRMS (ESI) Calcd for  $\text{C}_{20}\text{H}_{18}\text{N}_2\text{OH}^+$   $[\text{M}+\text{H}]^+$  303.1492; Found:

303.1483.

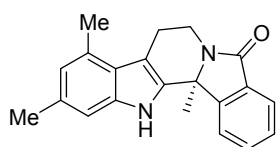

**9,11,13b-trimethyl-7,8,13,13b-tetrahydro-5H-benzo[1,2]indolizino[8,7-b]i**

**ndol-5-one(2q):** white solid, m.p: 270.6-271.6 °C, 92% yield, 82% ee, HPLC

condition: Chiralpak IC-H isopropyl alcohol/n-hexane:30/70, 1.0 mL/min,

$t_{\text{minor}} = 7.610$  min,  $t_{\text{major}} = 9.223$  min).  $[\alpha]_{\text{D}}^{20} = -146.2$  (c 1.0, ethanol).  $^1\text{H NMR}$  (300 MHz,  $\text{DMSO-}d_6$ )  $\delta$  10.79 (s, 1H), 8.48 (d,  $J = 7.9$  Hz, 1H), 7.79-7.63 (m, 2H), 7.51 (t,  $J = 7.3$  Hz, 1H), 6.98 (s, 1H), 6.71 (s, 1H), 4.51 (dd,  $J = 13.2, 4.8$  Hz, 1H), 3.34 (dd,  $J = 13.0, 4.9$  Hz, 1H), 2.81-2.55 (m, 2H), 2.47 (s, 3H), 2.29 (s, 3H), 1.87 (s, 3H).  $^{13}\text{C NMR}$  (75 MHz,  $\text{DMSO-}d_6$ )  $\delta$  167.36, 149.71, 135.06, 134.10, 132.24, 130.24, 128.54, 127.63, 126.01, 124.06, 123.19, 123.12, 120.18, 115.51, 106.61, 62.36, 35.59, 25.84, 21.70, 21.14, 17.10. HRMS (ESI) Calcd for  $\text{C}_{21}\text{H}_{20}\text{N}_2\text{OH}^+$   $[\text{M}+\text{H}]^+$  317.1648; Found: 317.1641.

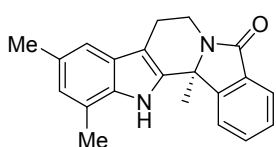

**10,12,13b-trimethyl-7,8,13,13b-tetrahydro-5H-benzo[1,2]indolizino[8,7-b]i**

**ndol-5-one(2r):** white solid, m.p: 118.3-120.1 °C, 94% yield, 93% ee, HPLC

condition: Chiralpak AD-H isopropyl alcohol/n-hexane:20/80, 1.0 mL/min,

$t_{\text{minor}} = 7.812$  min,  $t_{\text{major}} = 8.491$  min).  $[\alpha]_{\text{D}}^{20} = -110.3$  (c 1.0, ethanol).  $^1\text{H NMR}$  (300 MHz,  $\text{DMSO-}d_6$ )  $\delta$  11.13 (s, 1H), 8.30 (d,  $J = 7.7$  Hz, 1H), 7.70 (t,  $J = 7.5$  Hz, 2H), 7.51 (t,  $J = 7.4$  Hz, 1H), 6.96 (s, 1H), 6.51 (s, 1H), 5.76 (s, 1H), 4.47 (dd,  $J = 13.3, 5.4$  Hz, 1H), 3.35 (dd,  $J = 12.8, 4.5$  Hz, 1H), 3.16-2.76 (m, 2H), 2.45 (s, 3H), 2.30 (s, 3H), 1.83 (s, 3H).  $^{13}\text{C NMR}$  (75 MHz,  $\text{DMSO-}d_6$ )  $\delta$  167.32, 149.62, 136.70, 133.89, 132.25, 130.55, 130.31, 129.50, 128.63, 123.21, 123.03, 122.89, 121.90, 108.94, 106.66, 61.95, 35.66, 25.87, 23.80, 21.38, 19.44. HRMS (ESI) Calcd for  $\text{C}_{21}\text{H}_{20}\text{N}_2\text{OH}^+$   $[\text{M}+\text{H}]^+$  317.1648; Found: 317.1651.

### 2.3 Enantioselective intramolecular Pictet-Spengler type annulation of 2-formylbenzoic acid5 with tryptamine 4a.

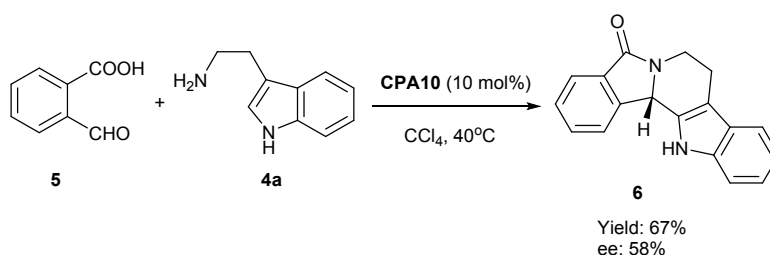

To a solution of **5** (0.1 mmol), **4a** (0.15 mmol) in anhydrous  $\text{CCl}_4$  (1.5 mL) was added CPA10 (10 mol%). The mixture was stirred at  $40^\circ\text{C}$  until the reaction was completed as determined by TLC. The solvent was removed in vacuo, and the residue was purified by column chromatography on a silica gel (petroleum ether : ethyl acetate = 10 : 1 to petroleum ether : ethyl acetate = 2 : 1) to afford the product **6**.

**7,8,13,13b-tetrahydro-5H-benzo[1,2]indolizino[8,7-b]indol-5-one (6):** white solid, m.p:  $289.3\text{-}293.6^\circ\text{C}$ , 68% yield, 57% ee, HPLC condition: Chiralpak AD-H isopropyl alcohol/n-hexane:10/90, 1.0 mL/min,  $t_{\text{minor}} = 28.190$  min,  $t_{\text{major}} = 49.703$  min).  $[\alpha]_{\text{D}}^{20} = +71.7$  (c 1.0, ethanol).  $^1\text{H NMR}$  (300 MHz,  $\text{DMSO-}d_6$ )  $\delta$  11.36 (s, 1H), 8.31 (d,  $J = 7.4$  Hz, 1H), 7.73 (dd,  $J = 15.8, 7.7$  Hz, 2H), 7.54 (t,  $J = 7.4$  Hz, 1H), 7.41 (d,  $J = 8.4$  Hz, 2H), 7.10 (t,  $J = 7.5$  Hz, 1H), 6.99 (t,  $J = 7.6$  Hz, 1H), 6.04 (s, 1H), 4.60 (dd,  $J = 13.1, 5.4$  Hz, 1H), 3.34 (dd,  $J = 12.9, 4.7$  Hz, 1H), 2.90-2.61 (m, 2H), 2.50 (s, 1H).  $^{13}\text{C NMR}$  (75 MHz,  $\text{DMSO-}d_6$ )  $\delta$  167.20, 143.67, 136.48, 131.90, 131.72, 130.91, 128.64, 126.18, 123.80, 123.16, 121.56, 118.89, 118.17, 111.30, 107.19, 56.67, 37.73, 21.42. HRMS (ESI) Calcd for  $\text{C}_{18}\text{H}_{15}\text{N}_2\text{OH}^+$   $[\text{M}+\text{H}]^+ 275.1179$ ; Found: 275.1177.

## 2.4 Reduction of **2a**<sup>[5]</sup>

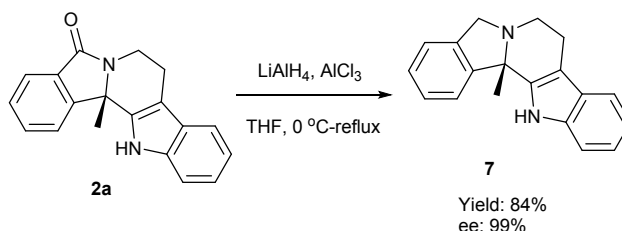

To a suspension of  $\text{LiAlH}_4$  (0.4 mmol) and  $\text{AlCl}_3$  (0.4 mmol) in anhydrous THF was added to a solution of **2a** (0.1 mmol) in THF dropwise at  $0^\circ\text{C}$ . After the addition, the mixture was heated to reflux for 4 h. After the reaction was cooled, dichloromethane (50 mL) was added to dilute the

---

reaction mixture, and water was added dropwise at 0 °C to quench the reaction. Then the solid which precipitated out was removed by filtration, and the organic phase obtained was dried with Na<sub>2</sub>SO<sub>4</sub> and concentrated. The residue was purified to give **7**.<sup>[5]</sup>

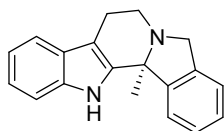

**13b-methyl-7,8,13,13b-tetrahydro-5H-benzo[1,2]indolizino[8,7-b]indole(7):**

white solid, m.p: 184.3-185.8 °C , 84% yield, >99 % ee, HPLC condition: Chiralpak AD-H isopropyl alcohol/n-hexane:30/70, 1.0 mL/min,  $t_{\text{minor}} = 4.950$  min,  $t_{\text{major}} = 6.116$  min).  $[\alpha]_{\text{D}}^{20} = -163.4$  (c 1.0, ethanol). <sup>1</sup>H NMR (300 MHz, CDCl<sub>3</sub>)  $\delta$  7.71 (s, 1H), 7.55-7.42 (m, 2H), 7.29 (dd,  $J = 13.5, 7.8$  Hz, 3H), 7.23-7.19 (m, 2H), 7.16-7.06 (m, 2H), 4.21 (q,  $J = 12.7$  Hz, 2H), 3.65-3.35 (m, 2H), 3.16 (ddd,  $J = 17.2, 11.2, 6.2$  Hz, 1H), 2.64 (dd,  $J = 16.1, 4.3$  Hz, 1H), 1.87 (s, 3H).

## References:

1. X. J. Dai, M. Liu, J. Y. Zhang, X. Y. Xu, W. C. Yuan and X. M. Zhang. *ChemistrySelect* 2019, **4**, 4458-4461.
2. J. Li, Y.F. Zhao, X.Y. Yuan, J.X. Xu and P. Gong, *Molecules*. 2006, **11**, 574-582.
3. B. Lu, M. Zhao, G. Ding, X. Xie, L. Jiang, V. Ratovelomanana-Vidal and Z. Zhang, *ChemCatChem*. 2017, **9**, 3989-3996.
4. M. E. Muratore, C. A. Holloway, A. W. Pilling, R. I. Storer, G. Trevitt and D. J. Dixon, *J. Am. Chem. Soc.* 2009, **131**, 10796-10797.
5. Z. Li, J. Li, N. Yang, Y. Chen, Y. Zhou, X. Ji, L. Zhang, J. F. Wang, X. Xie and H. Liu. *J. Org. Chem.* 2013, **78**, 10802-10811.

### 3. <sup>1</sup>H NMR and <sup>13</sup>C NMR spectra

2-(2-(1H-indol-3-yl)ethyl)-3-methyleneisoindolin-1-one (1a)

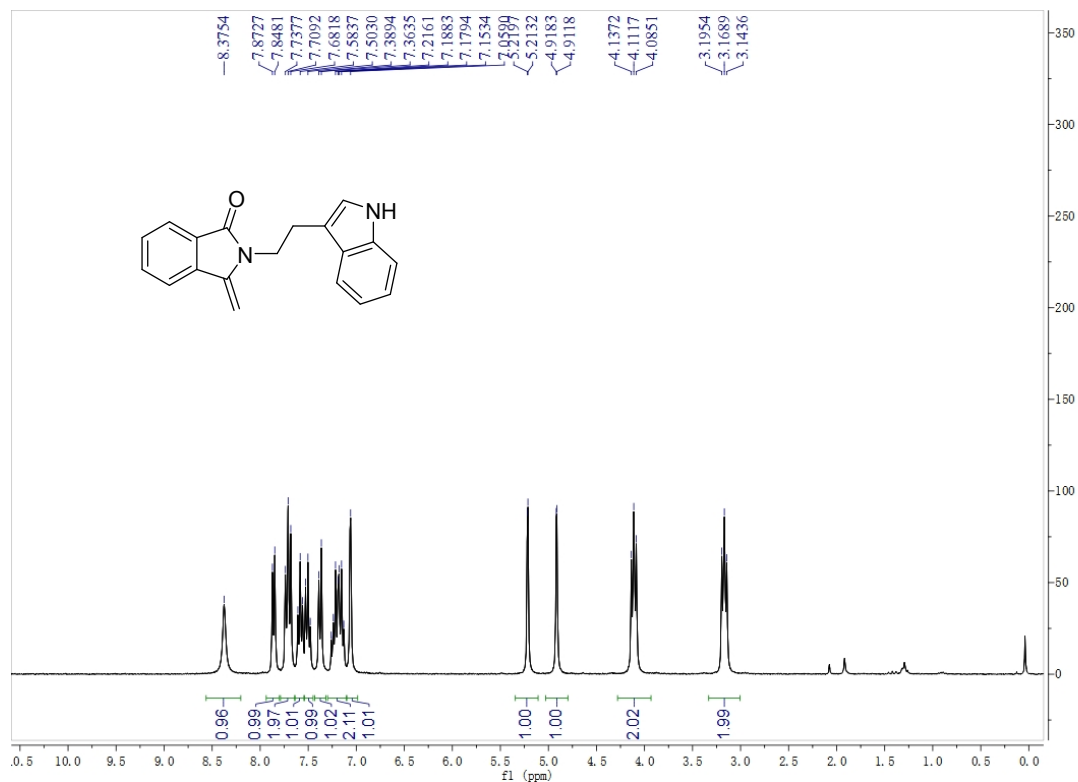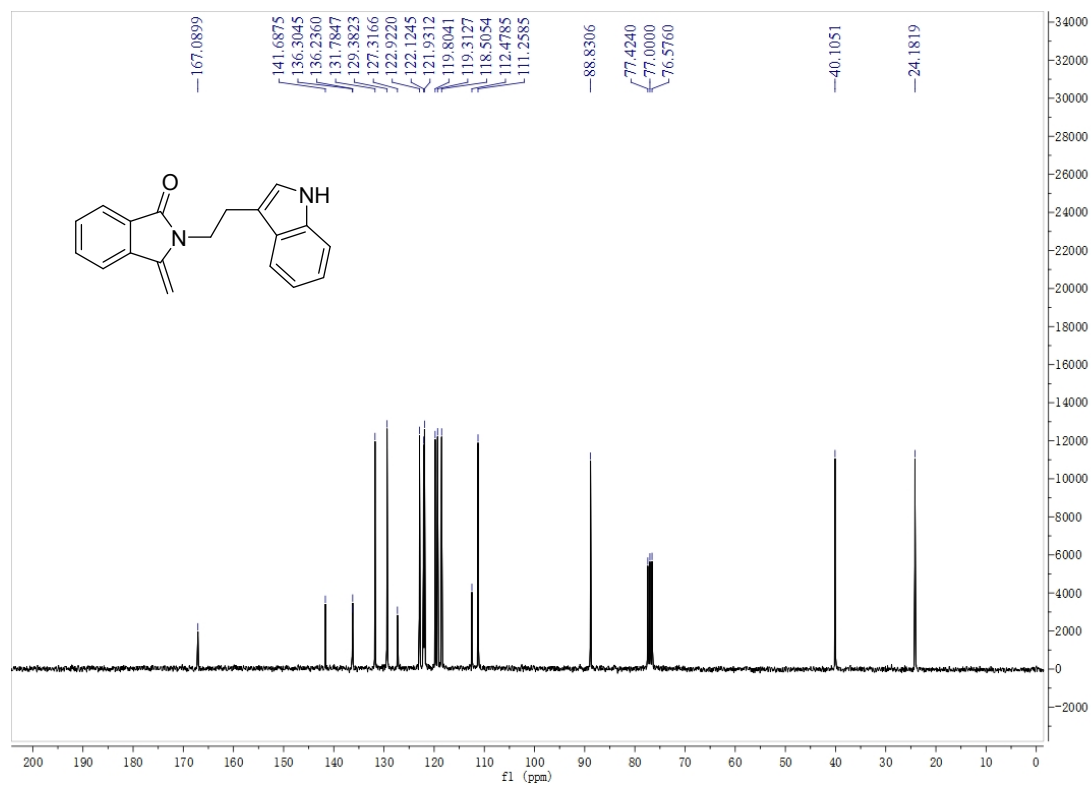

(2-(1H-indol-3-yl)ethyl)-4-fluoro-3-methyleneisoindolin-1-one (1b)

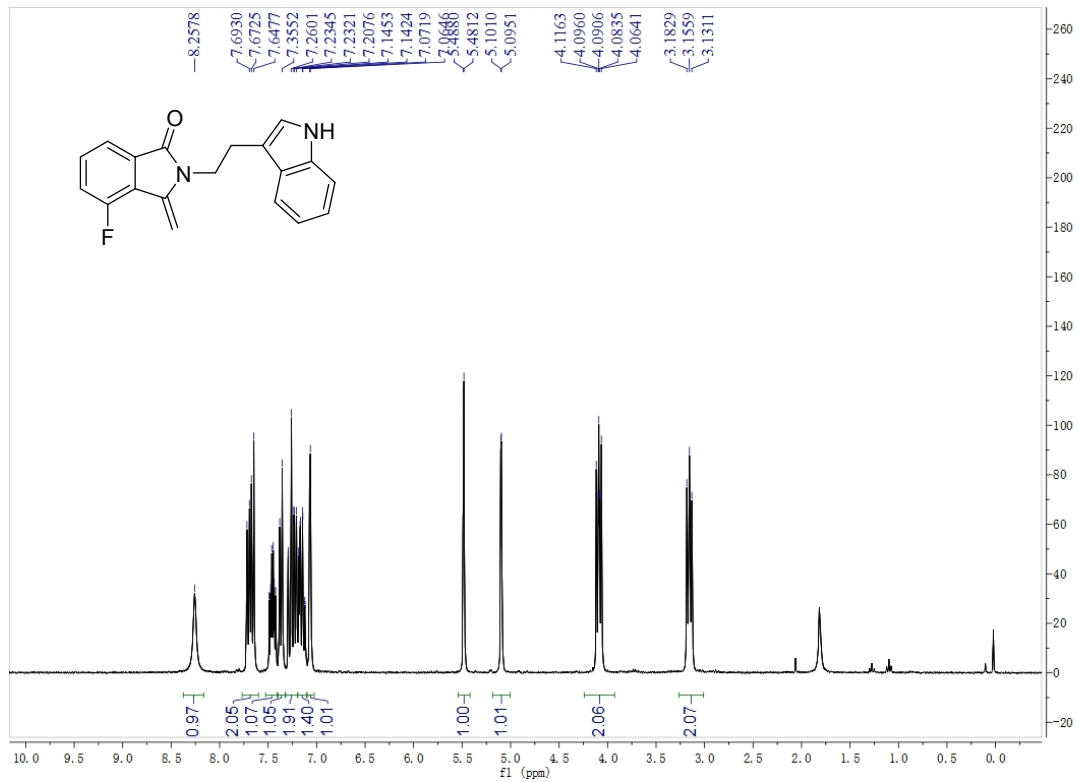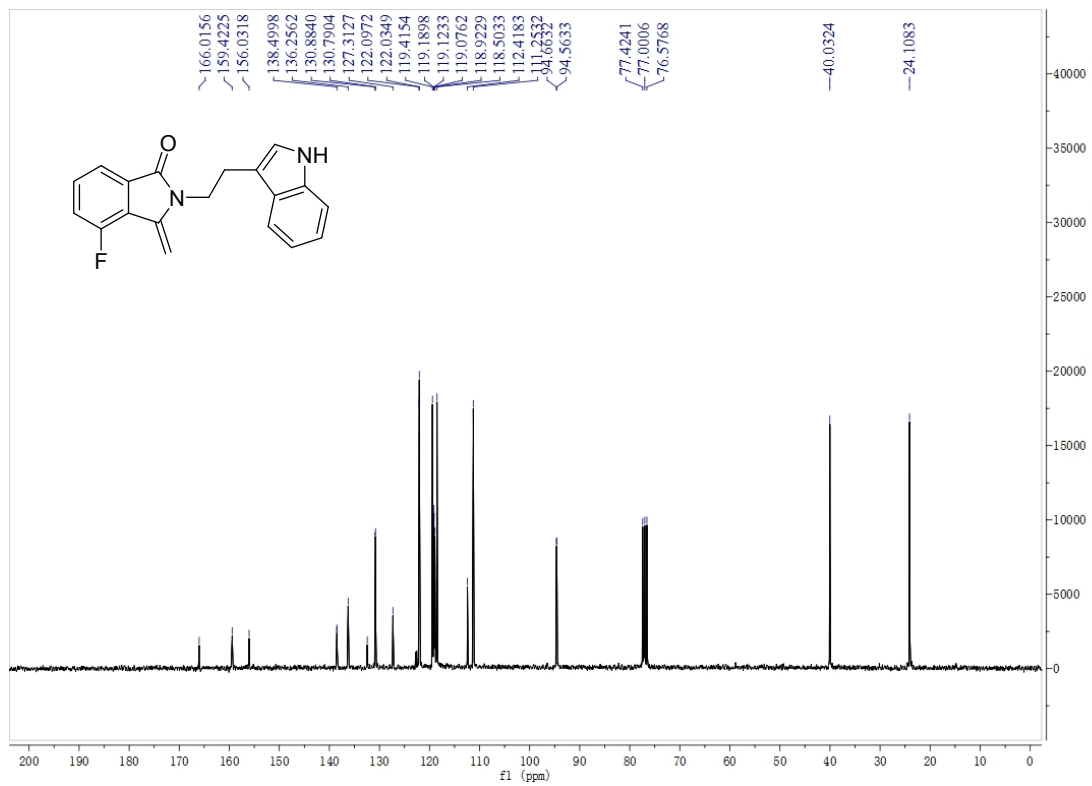



### 2-(2-(1H-indol-3-yl)ethyl)-5-fluoro-3-methyleneisoindolin-1-one (1c)

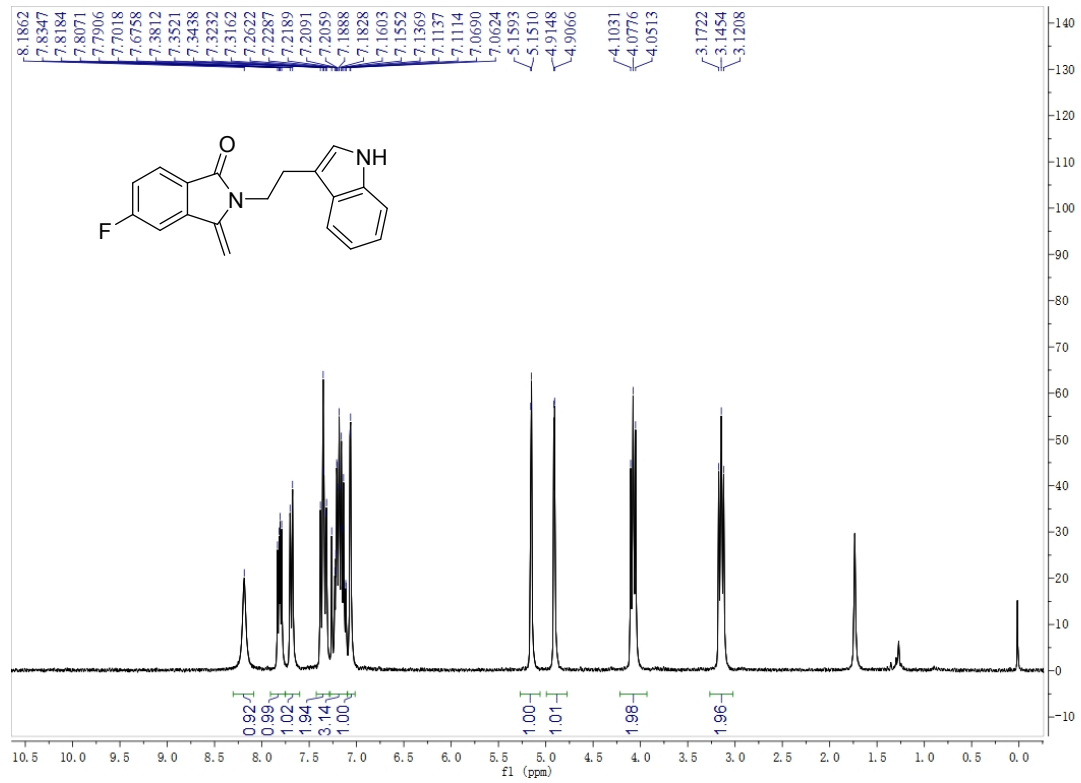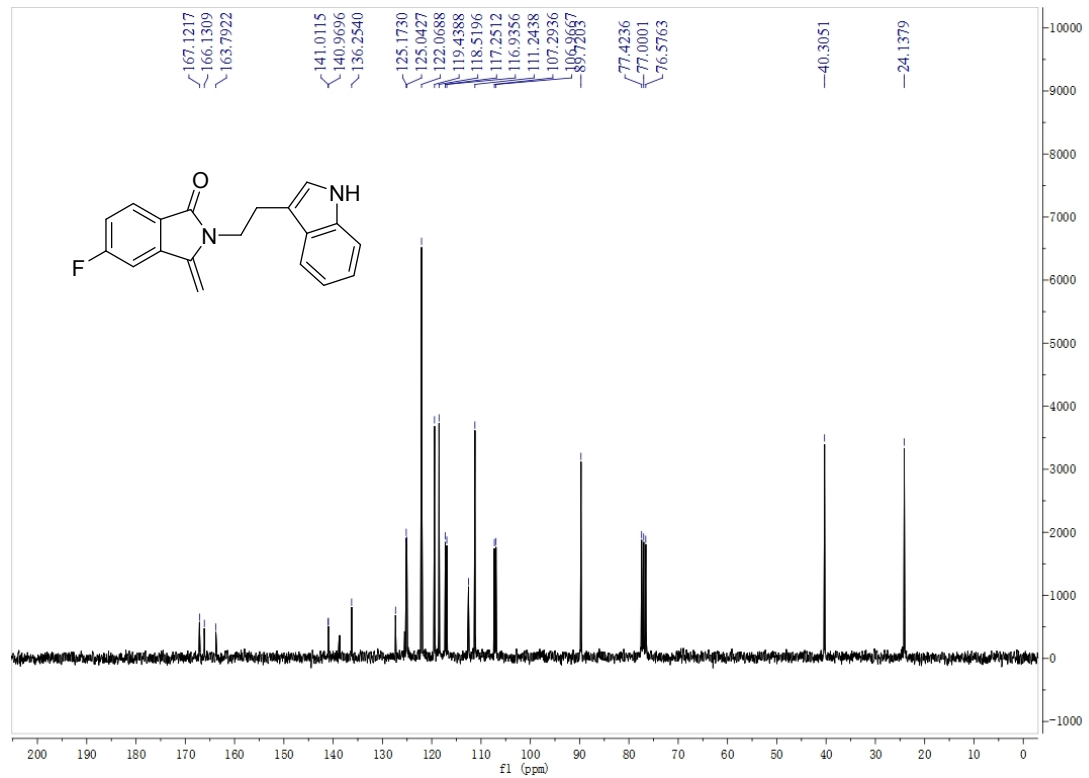

2-(2-(1H-indol-3-yl)ethyl)-6-fluoro-3-methyleneisindolin-1-one (1d)

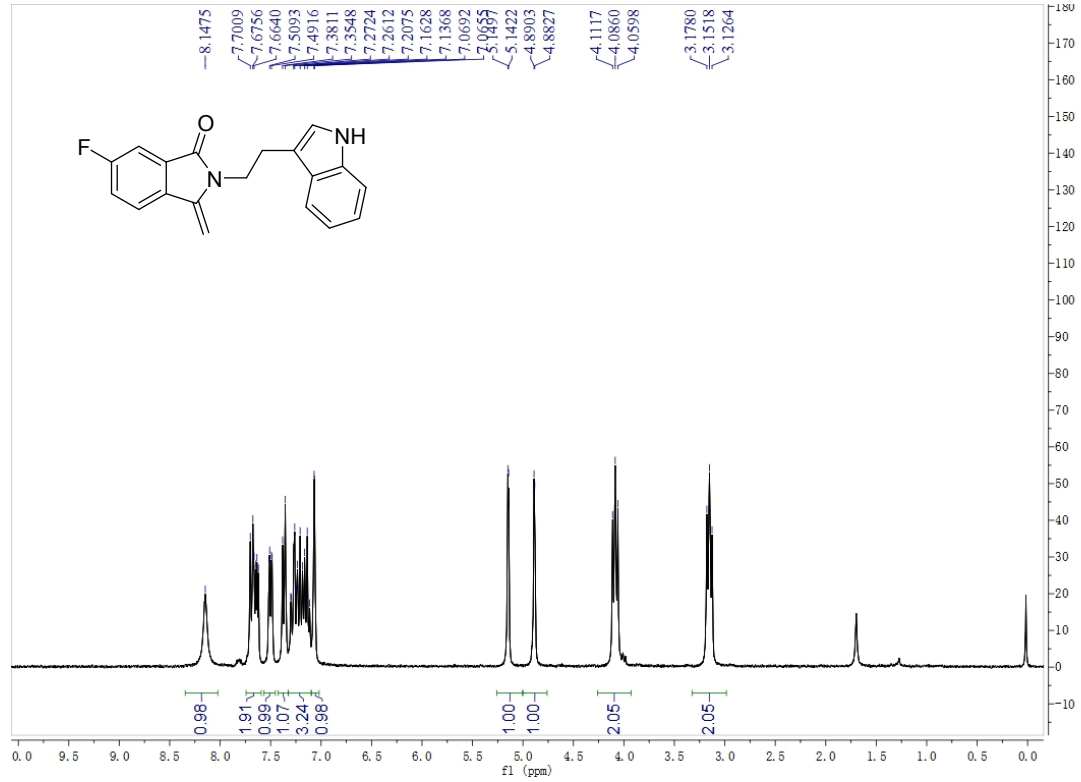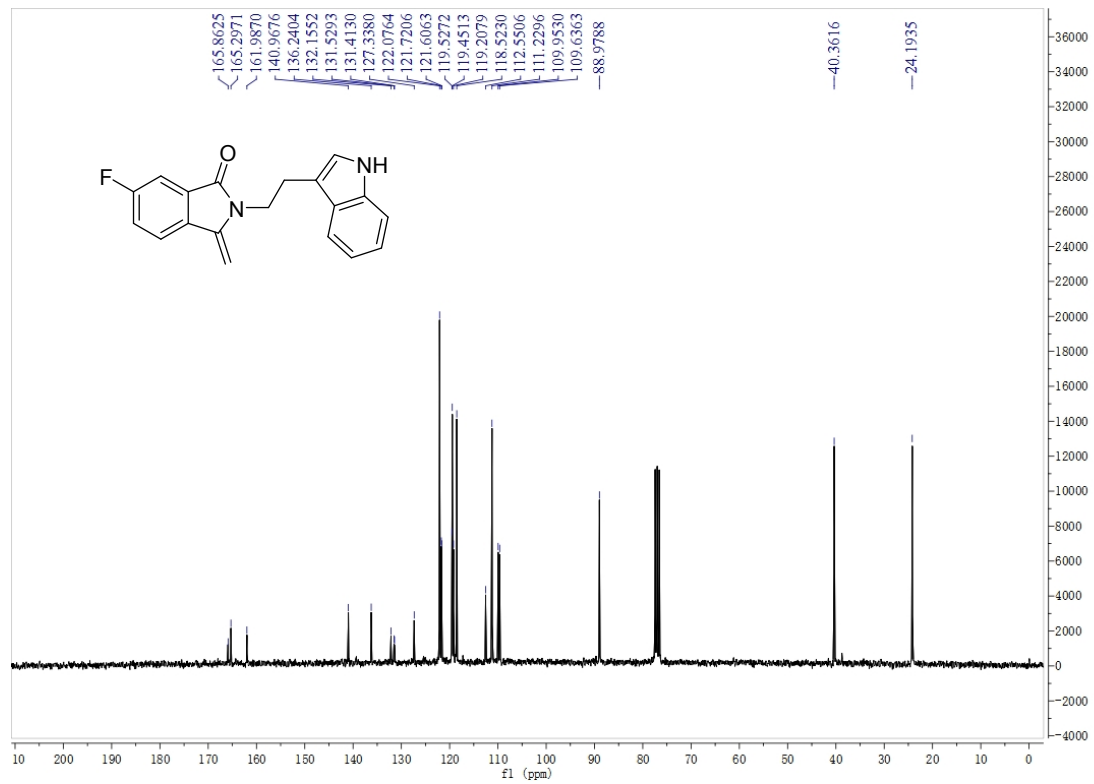

2-(2-(1H-indol-3-yl)ethyl)-6-chloro-3-methyleneisoindolin-1-one (1e)

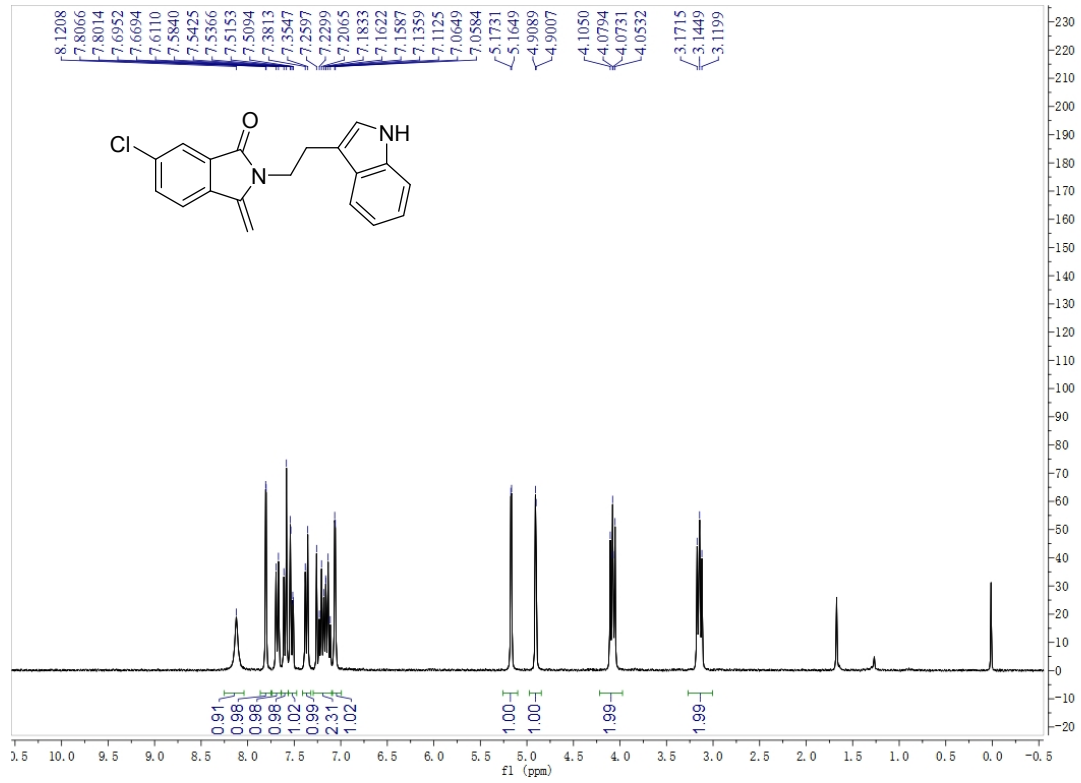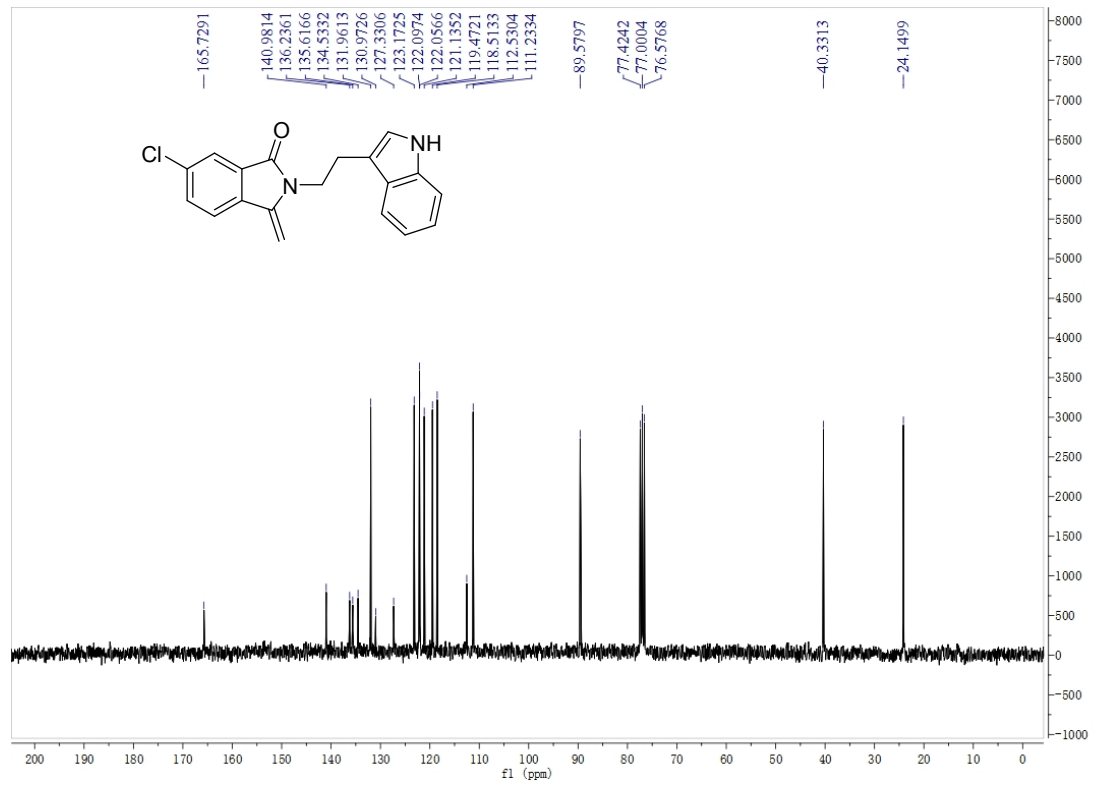

**(2-(1H-indol-3-yl)ethyl)-6-bromo-3-methyleneisoindolin-1-one (1f)**

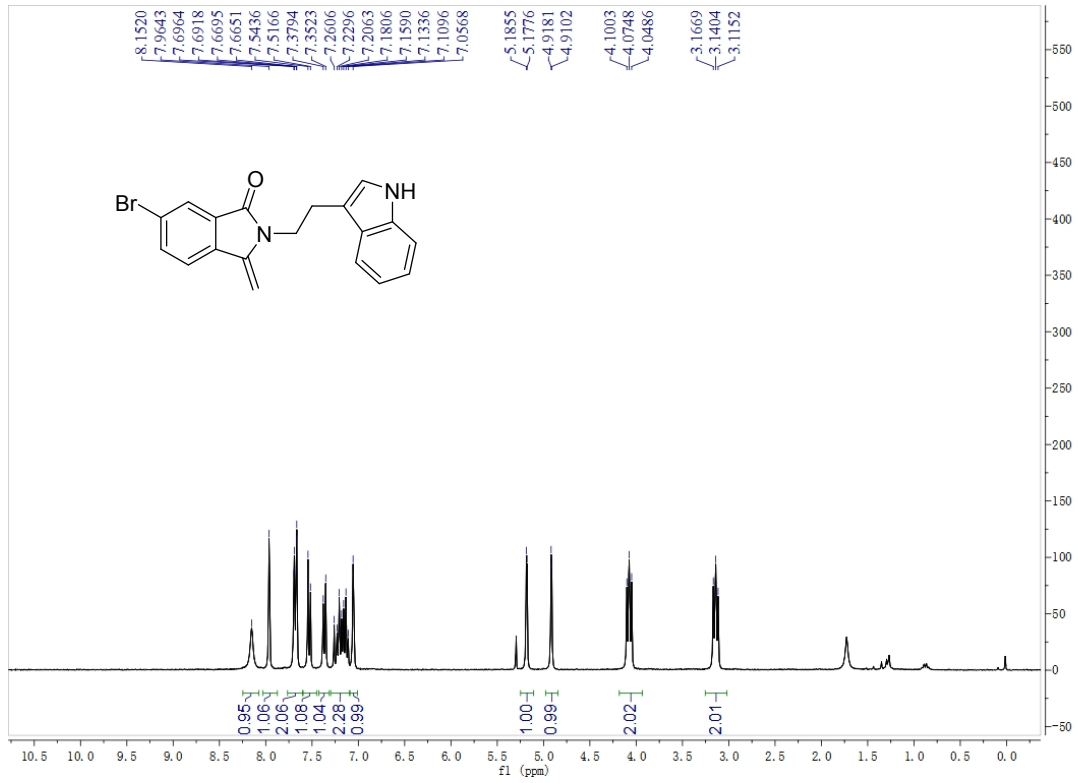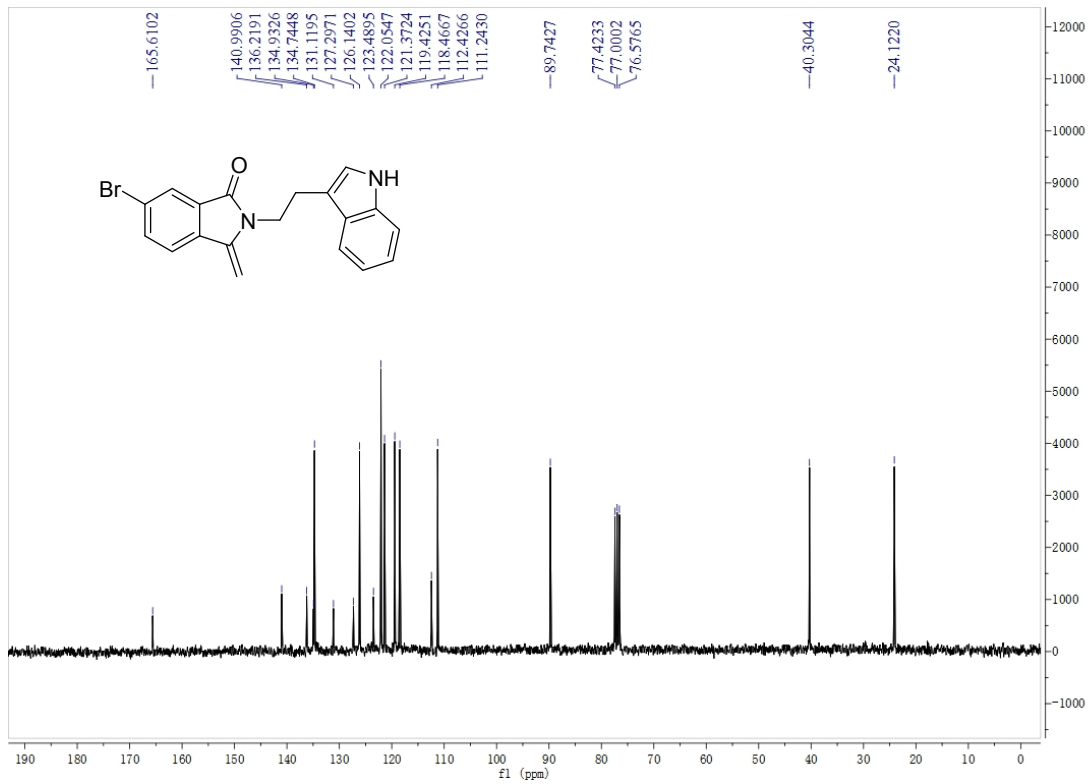

(2-(1H-indol-3-yl)ethyl)-6-methyl-3-methyleneisoindolin-1-one (1g)

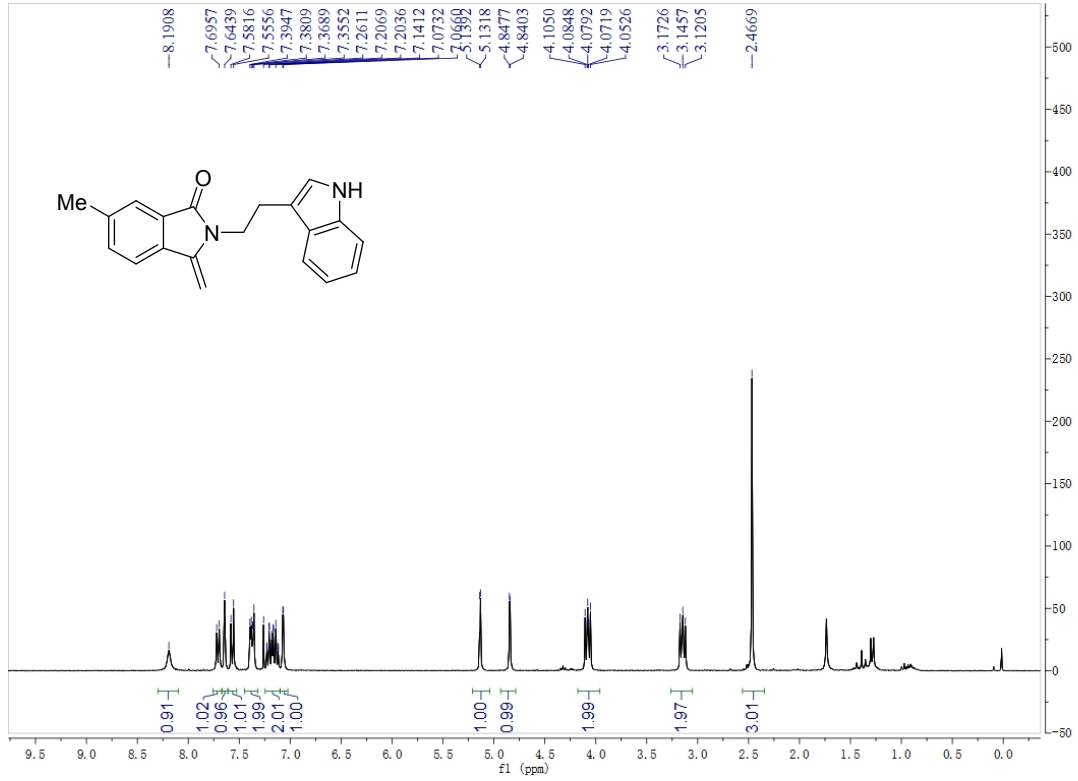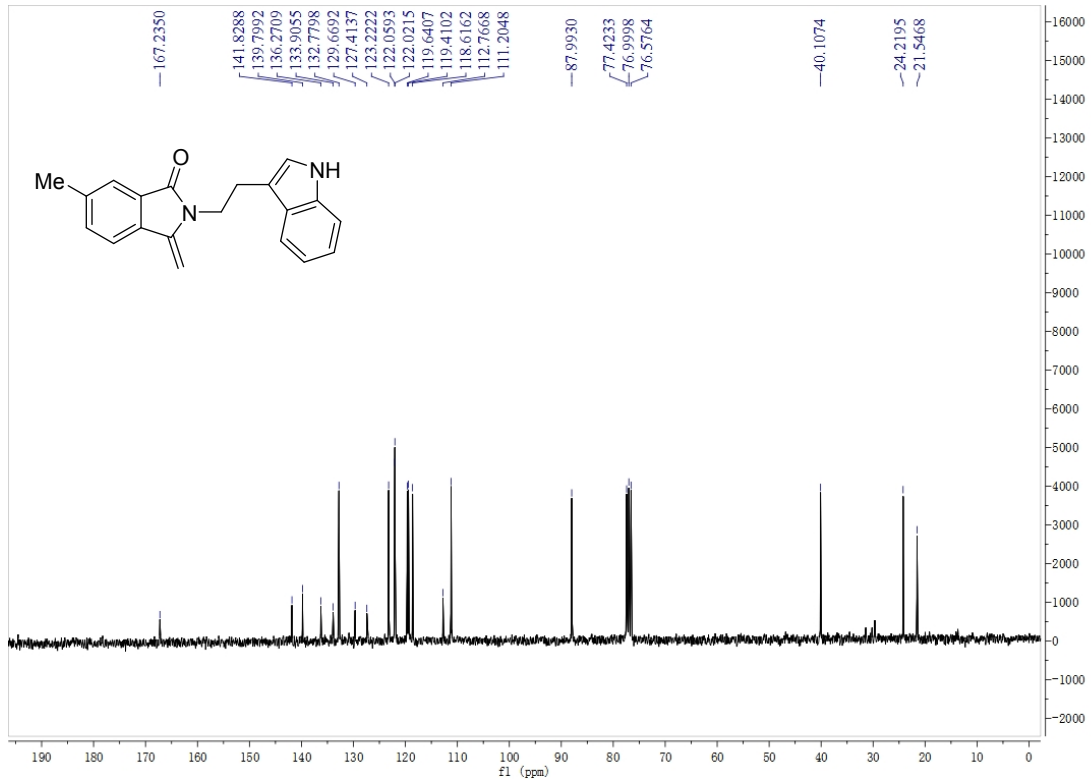

## 2-(2-(1H-indol-3-yl)ethyl)-3-benzylideneisoindolin-1-one (1h)

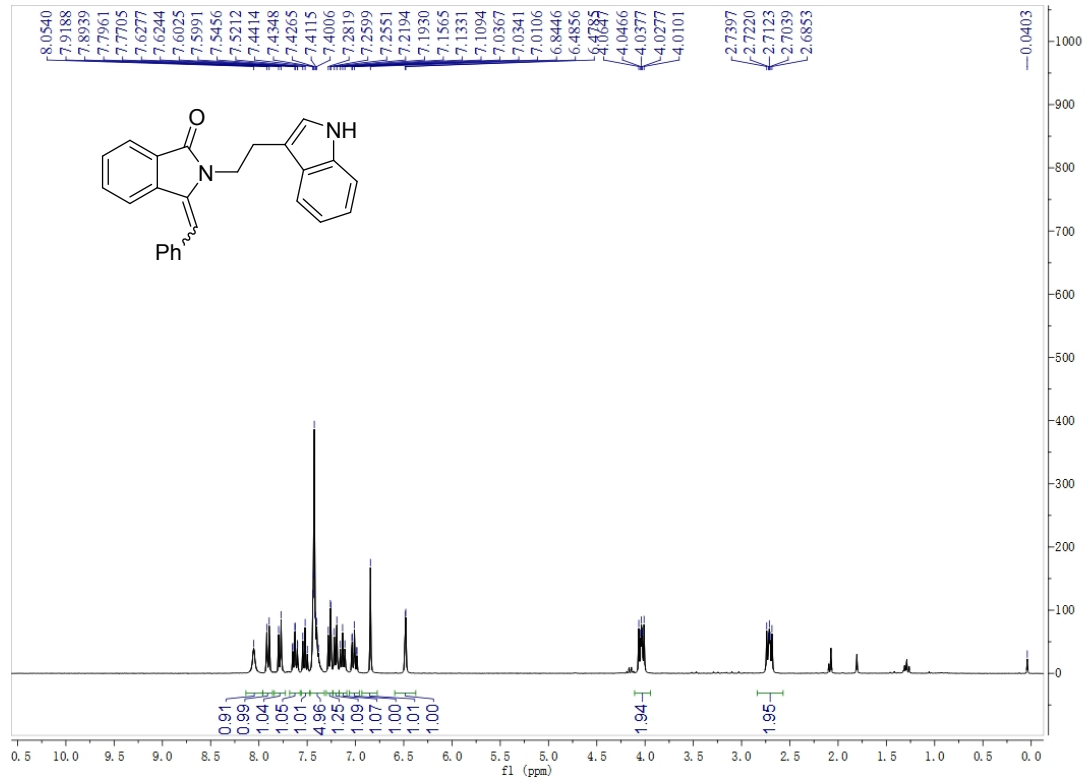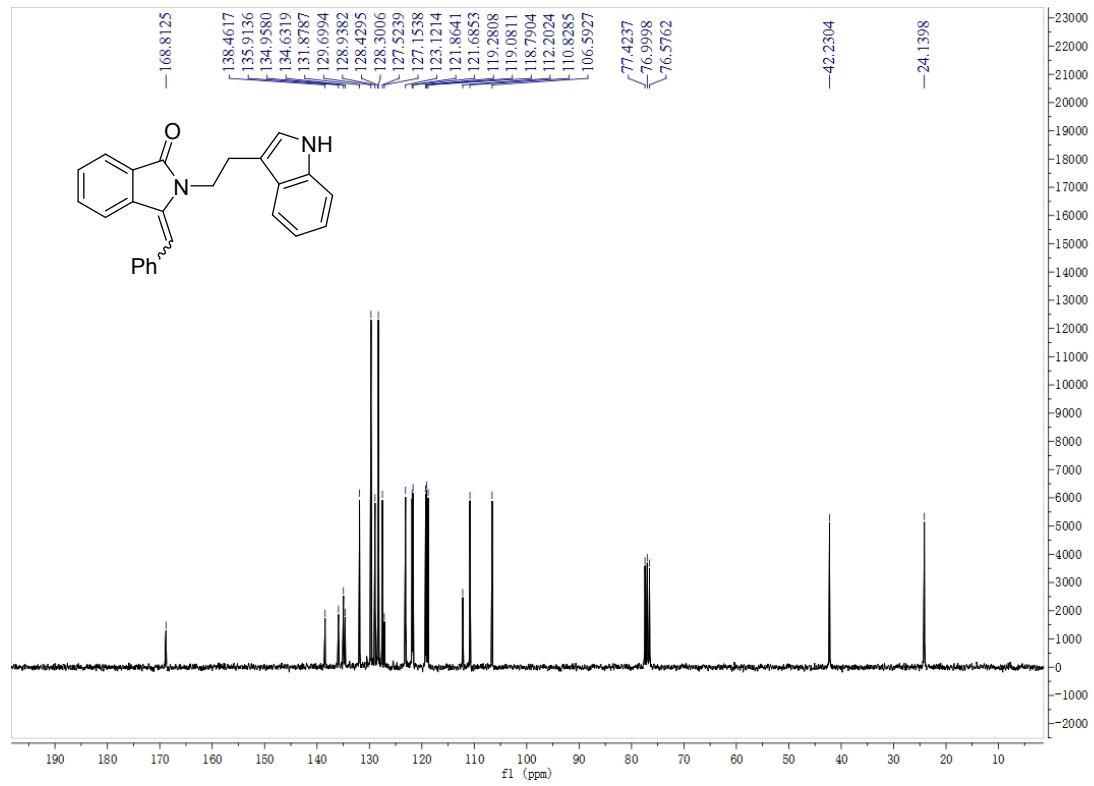

## 2-(2-(4-fluoro-1H-indol-3-yl)ethyl)-3-methyleneisoindolin-1-one (1i)

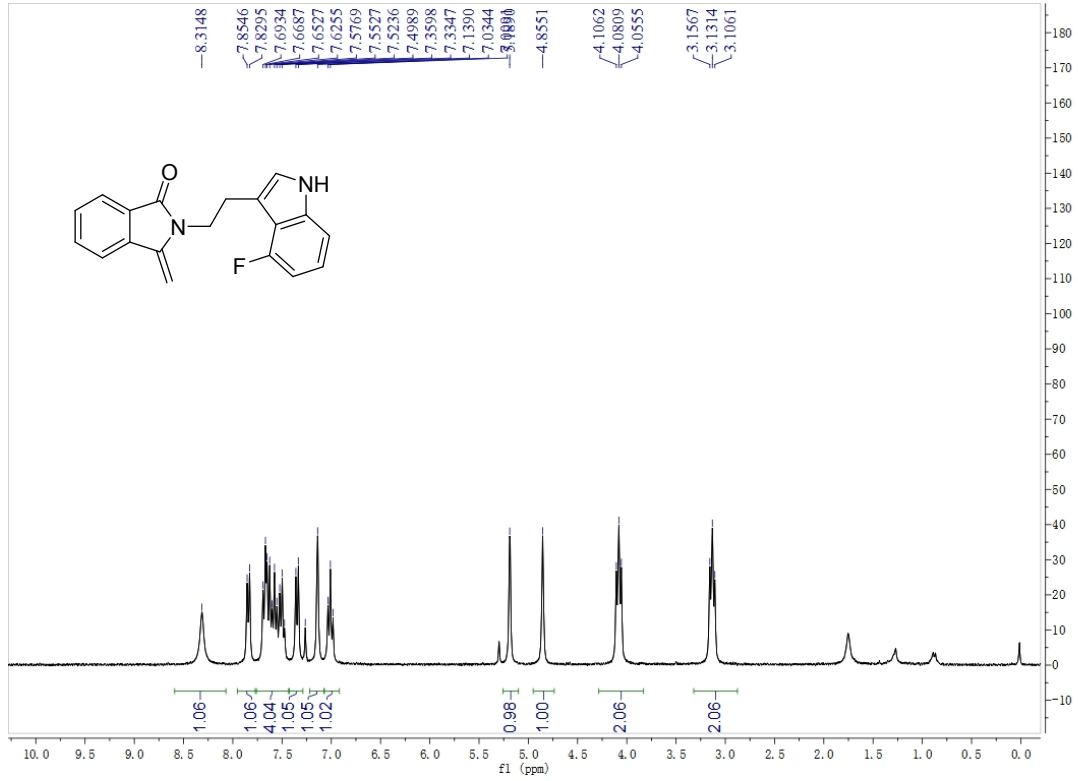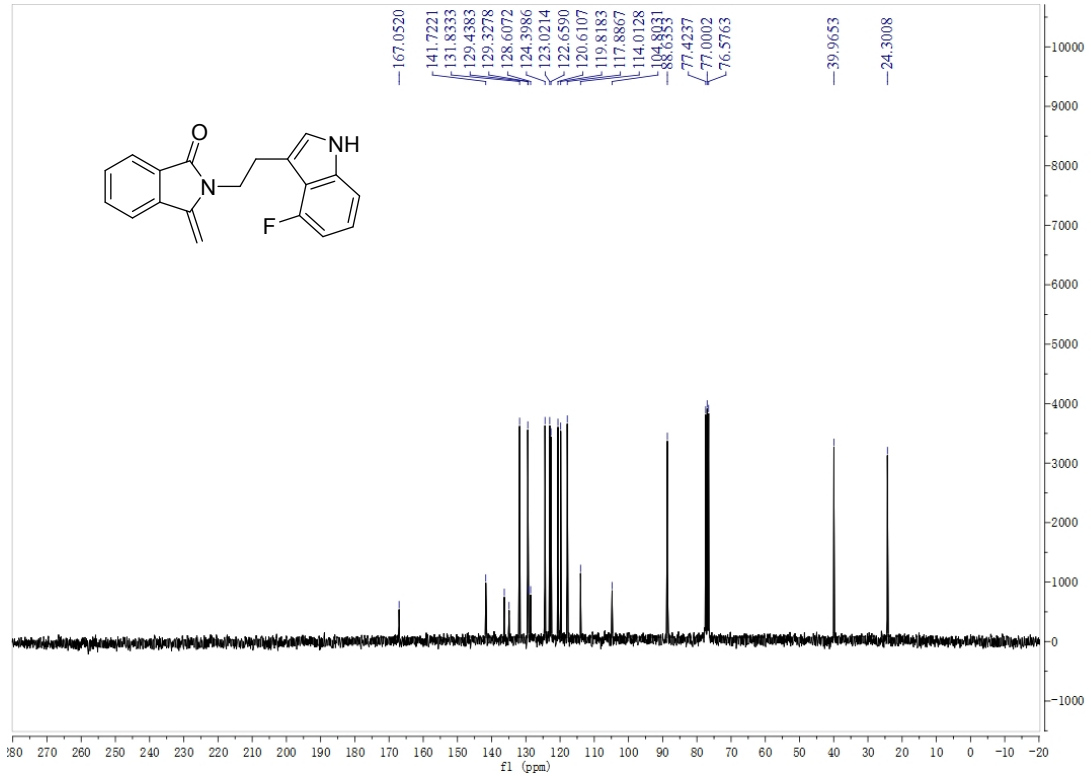

2-(2-(5-bromo-1H-indol-3-yl)ethyl)-3-methyleneisoindolin-1-one (1j)

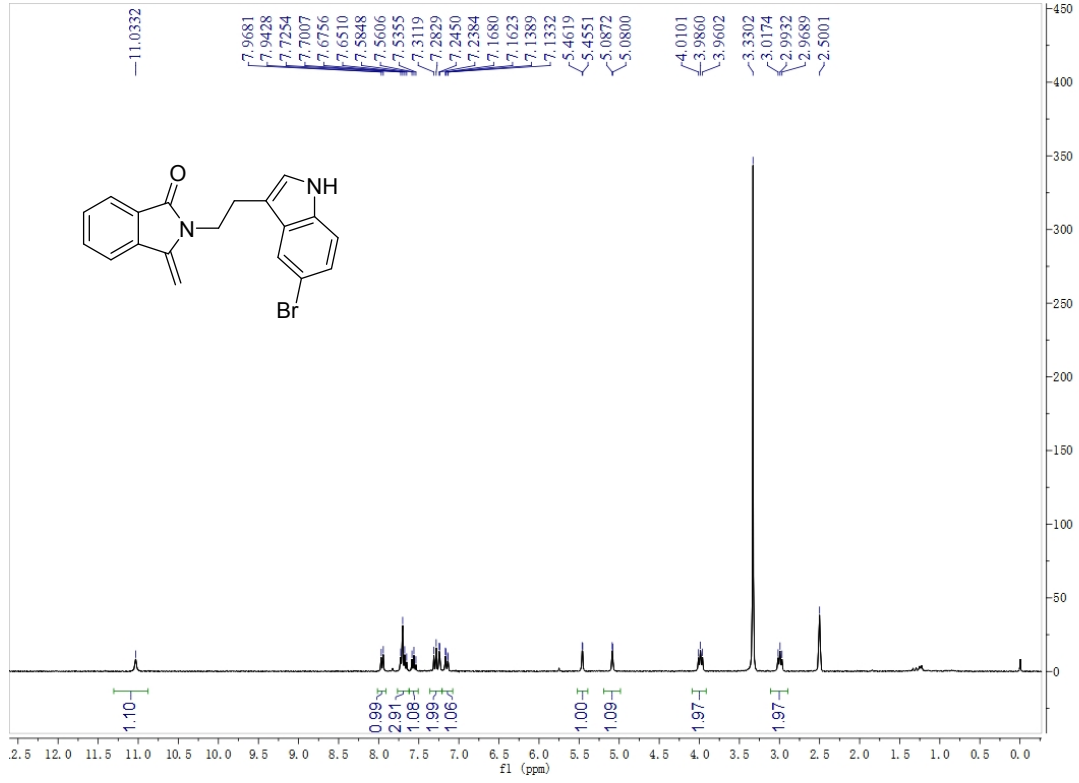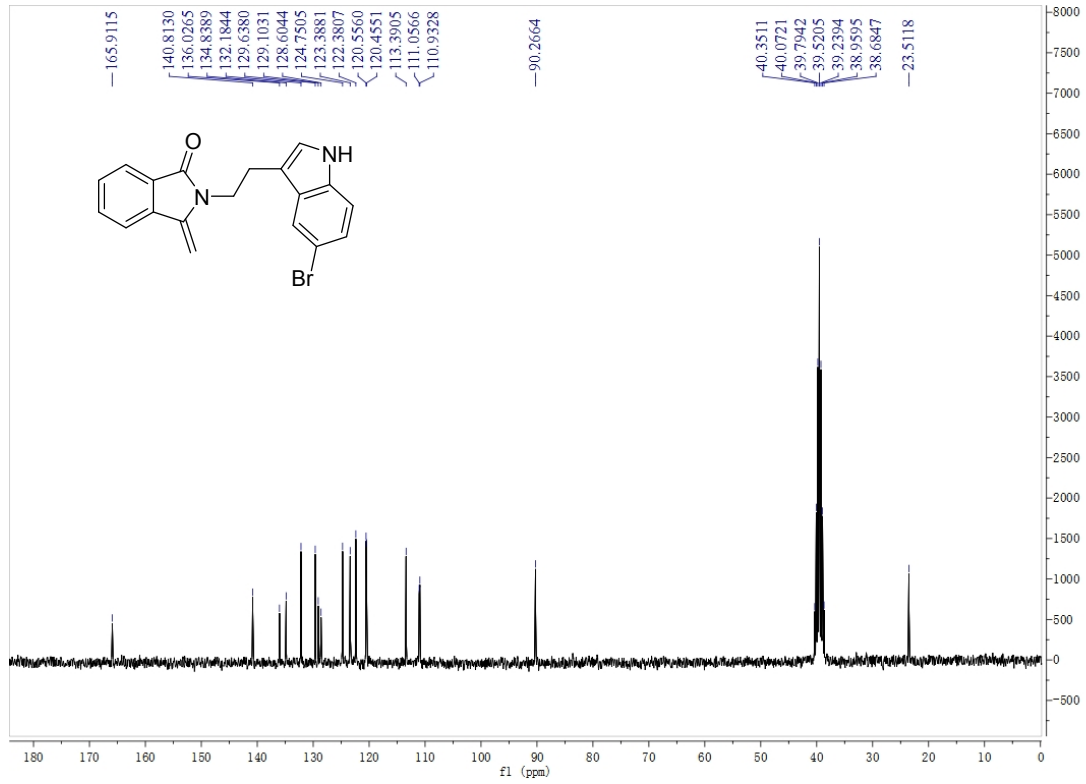



## 2-(2-(5-methoxy-1H-indol-3-yl)ethyl)-3-methyleneisoindolin-1-one (1k)

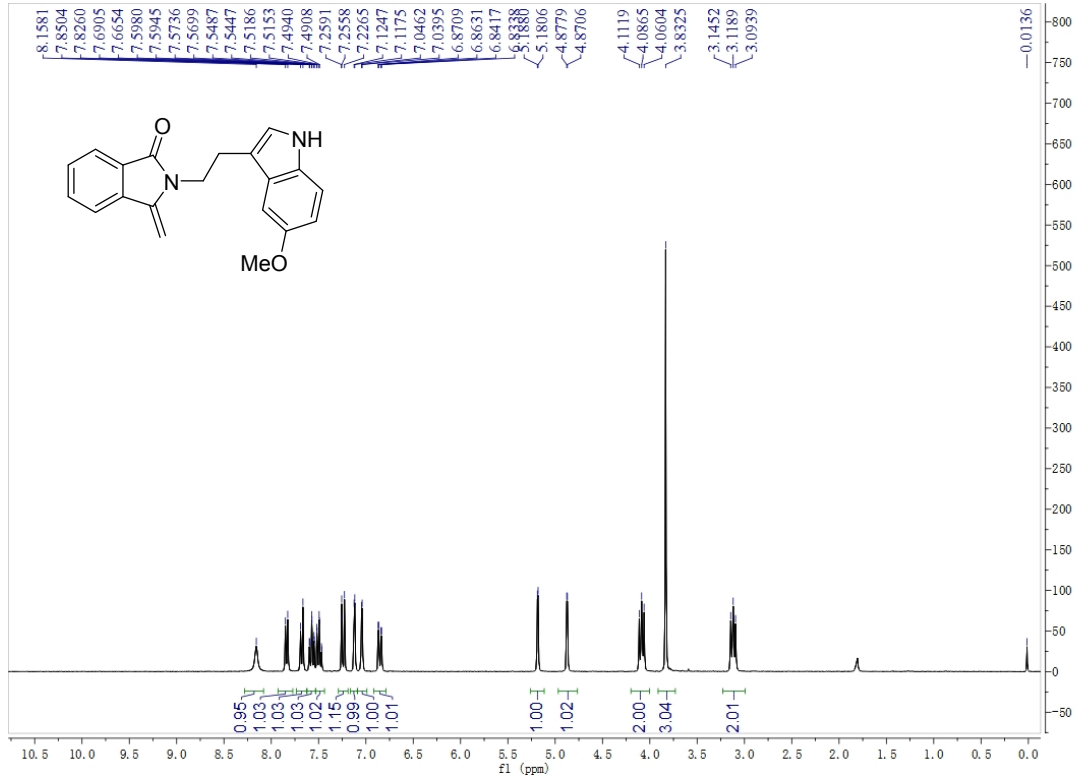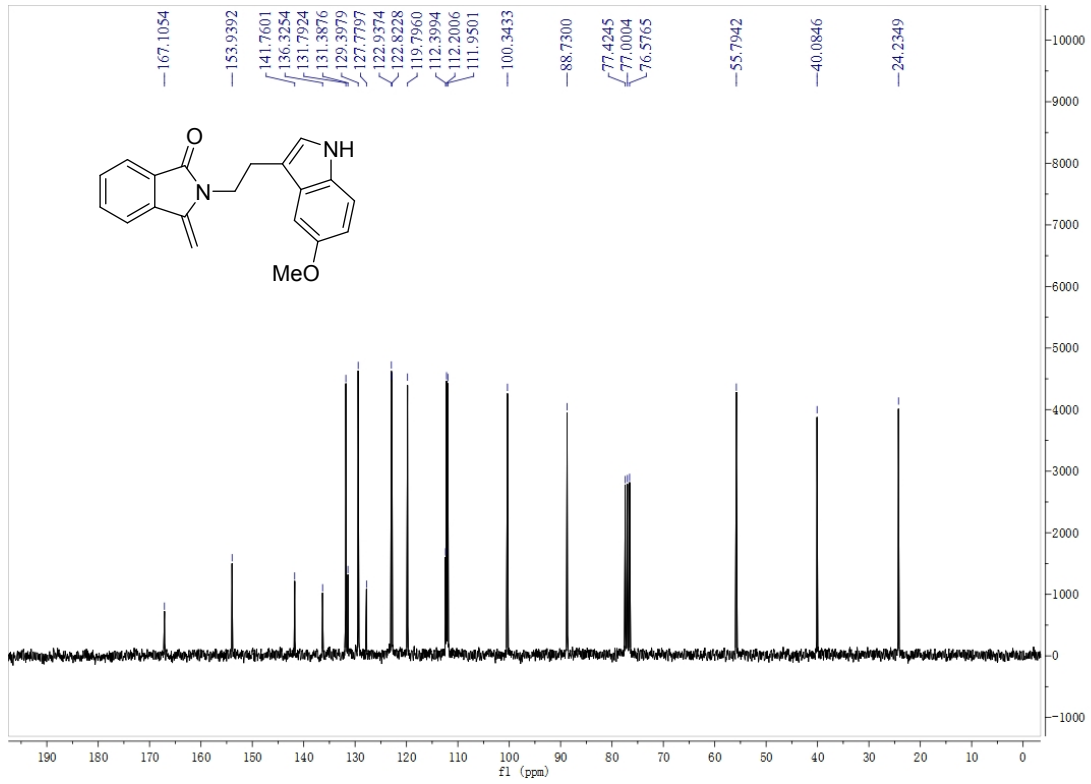

# 2-(2-(5-(benzyloxy)-1H-indol-3-yl)ethyl)-3-methyleneisoindolin-1-one (1I)

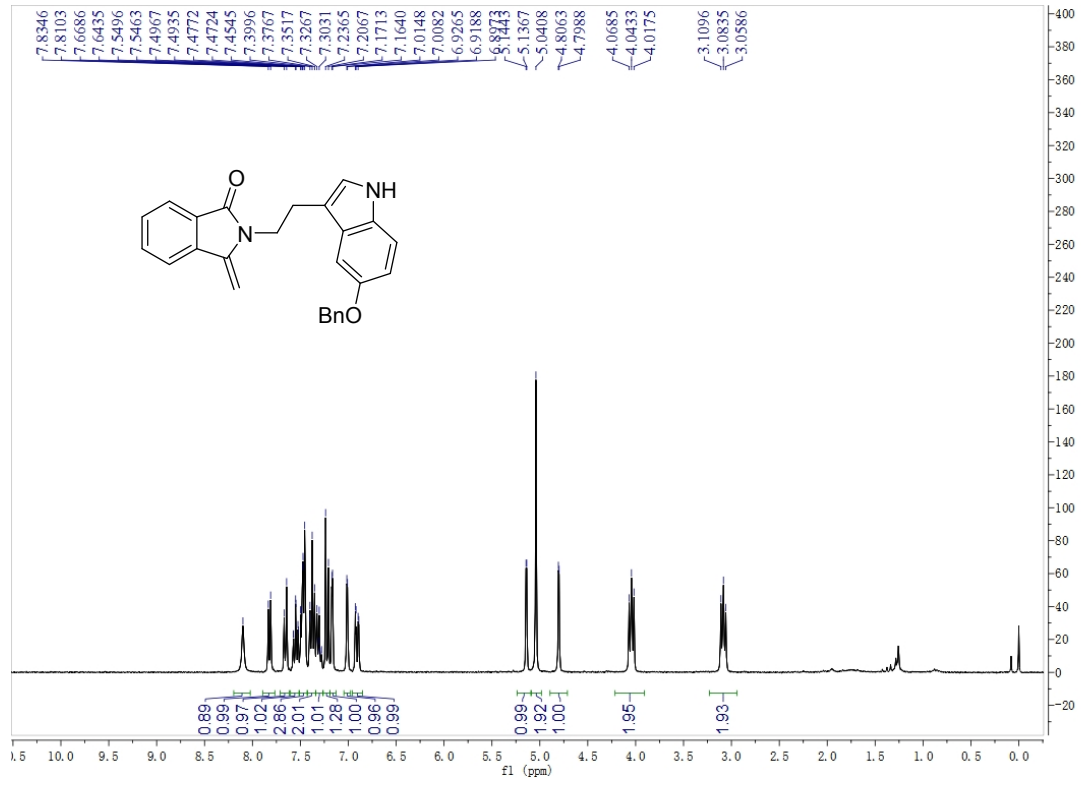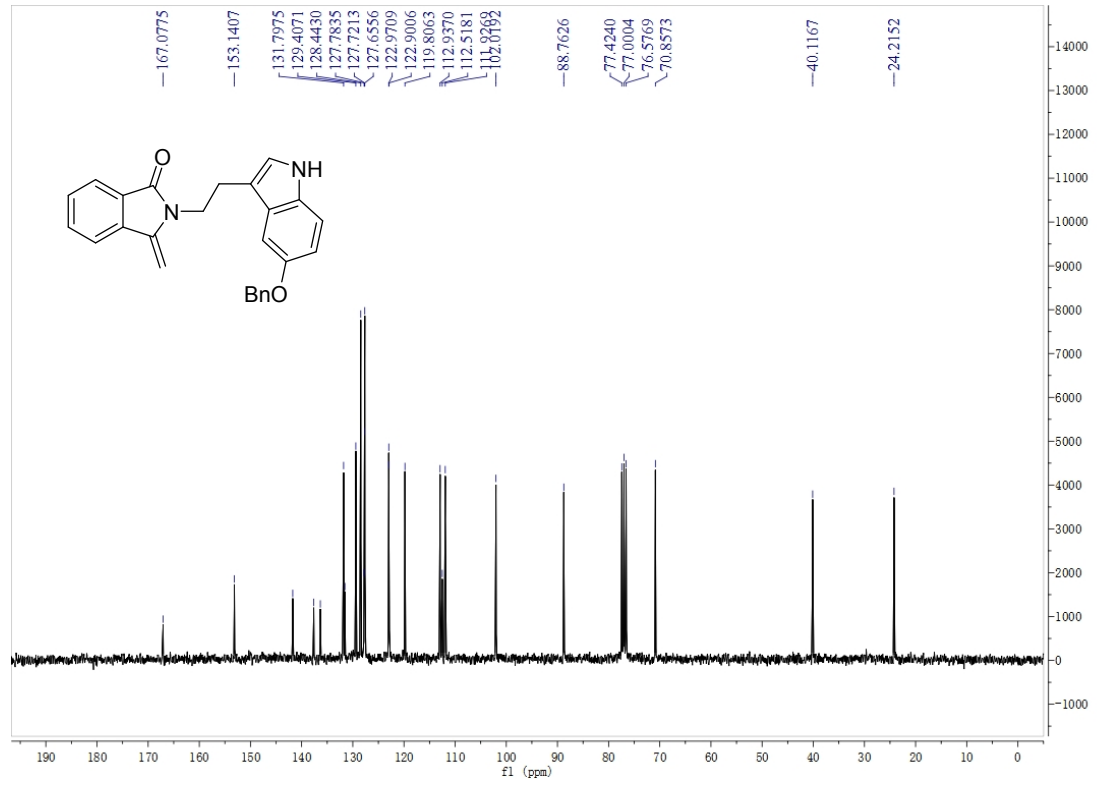

## 2-(2-(5-ethyl-1H-indol-3-yl)ethyl)-3-methyleneisoindolin-1-one (1m)

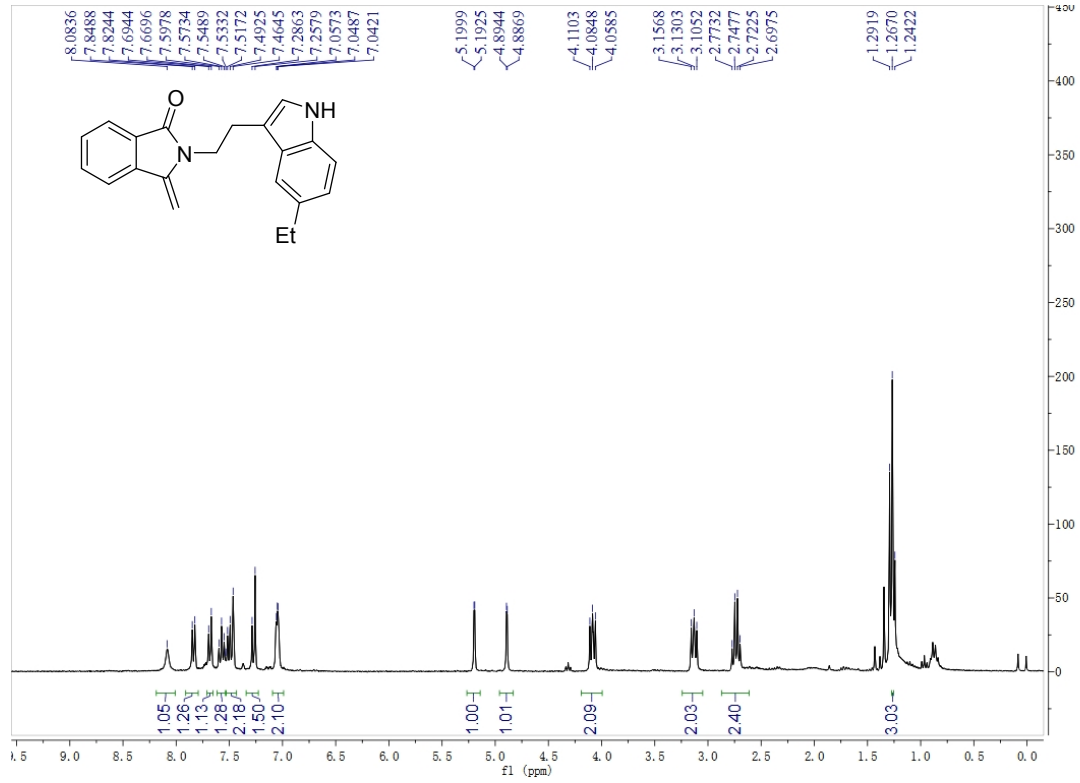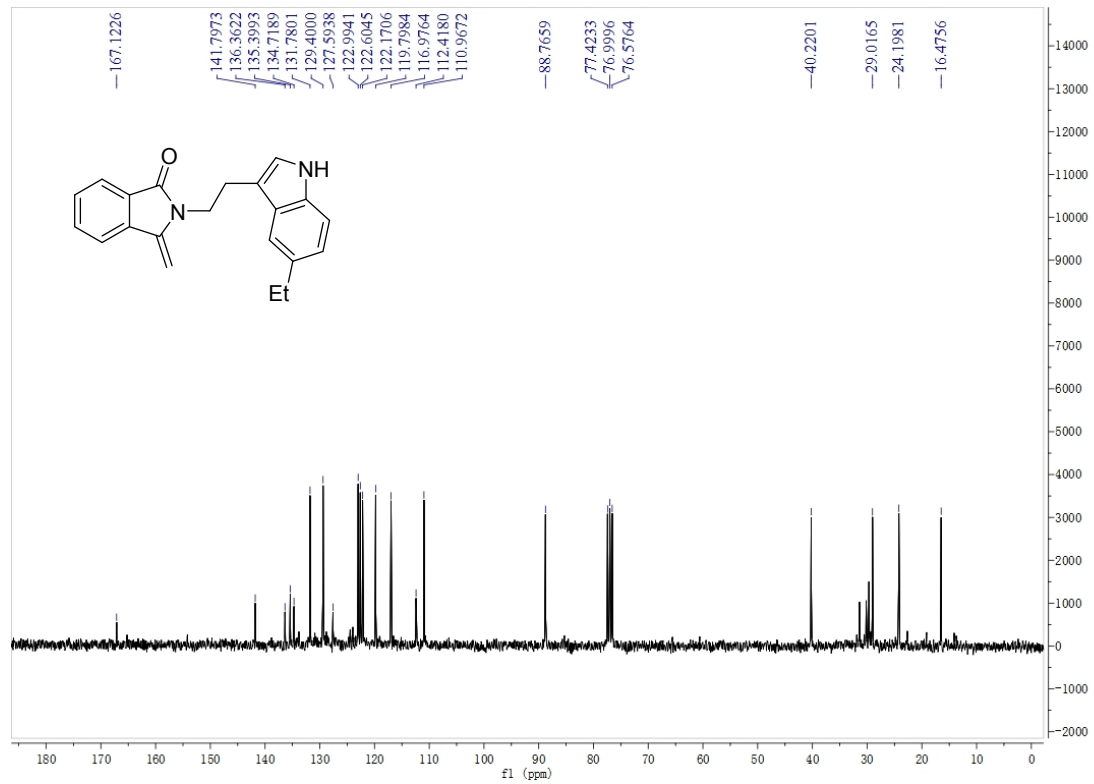

## 2-(2-(5-isopropyl-1H-indol-3-yl)ethyl)-3-methyleneisoindolin-1-one (1n)

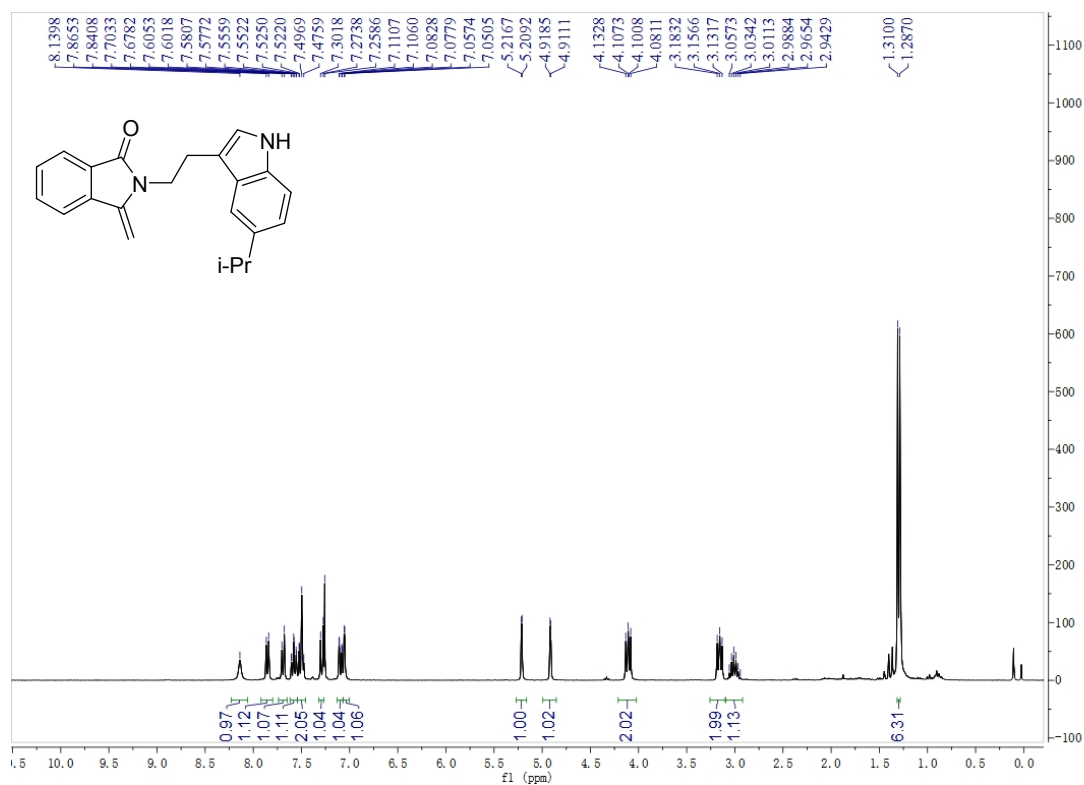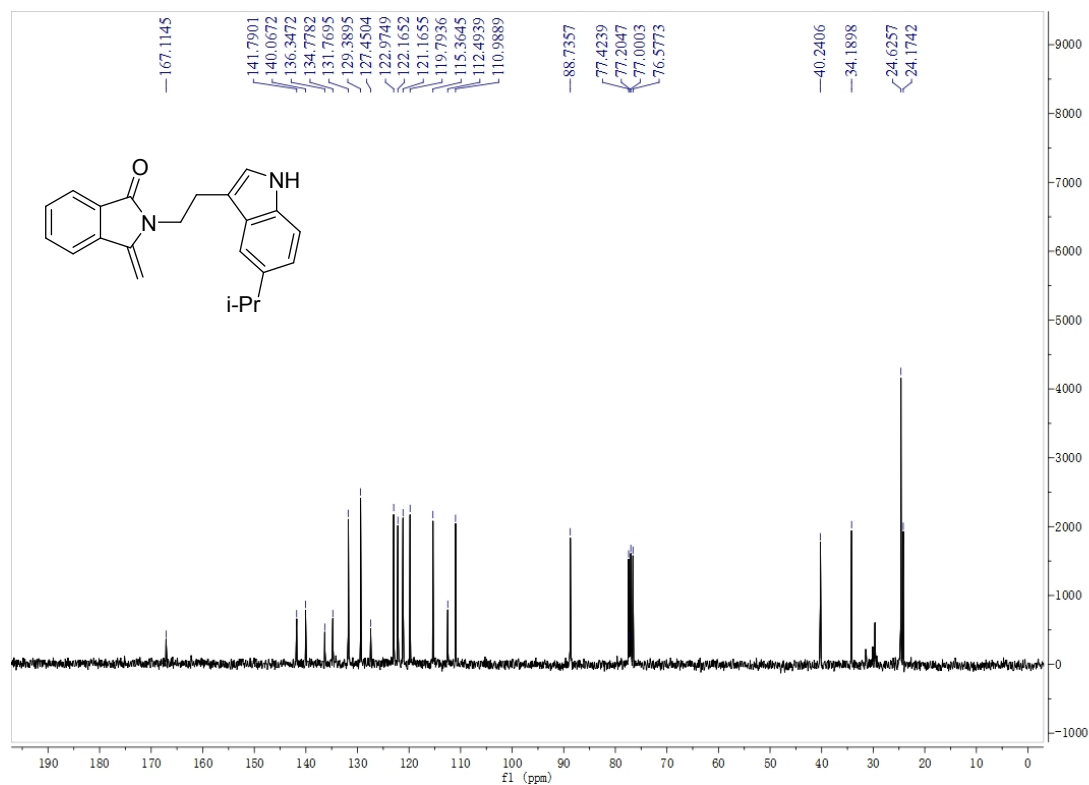

## 2-(2-(6-bromo-1H-indol-3-yl)ethyl)-3-methyleneisoindolin-1-one (1o)

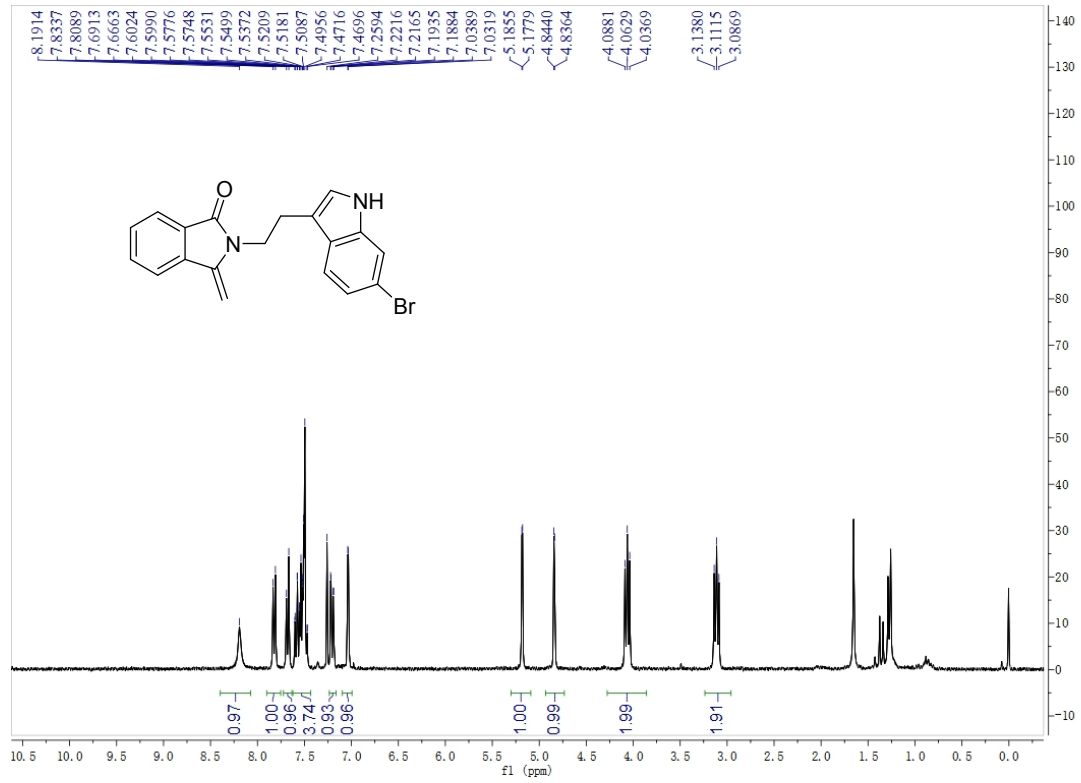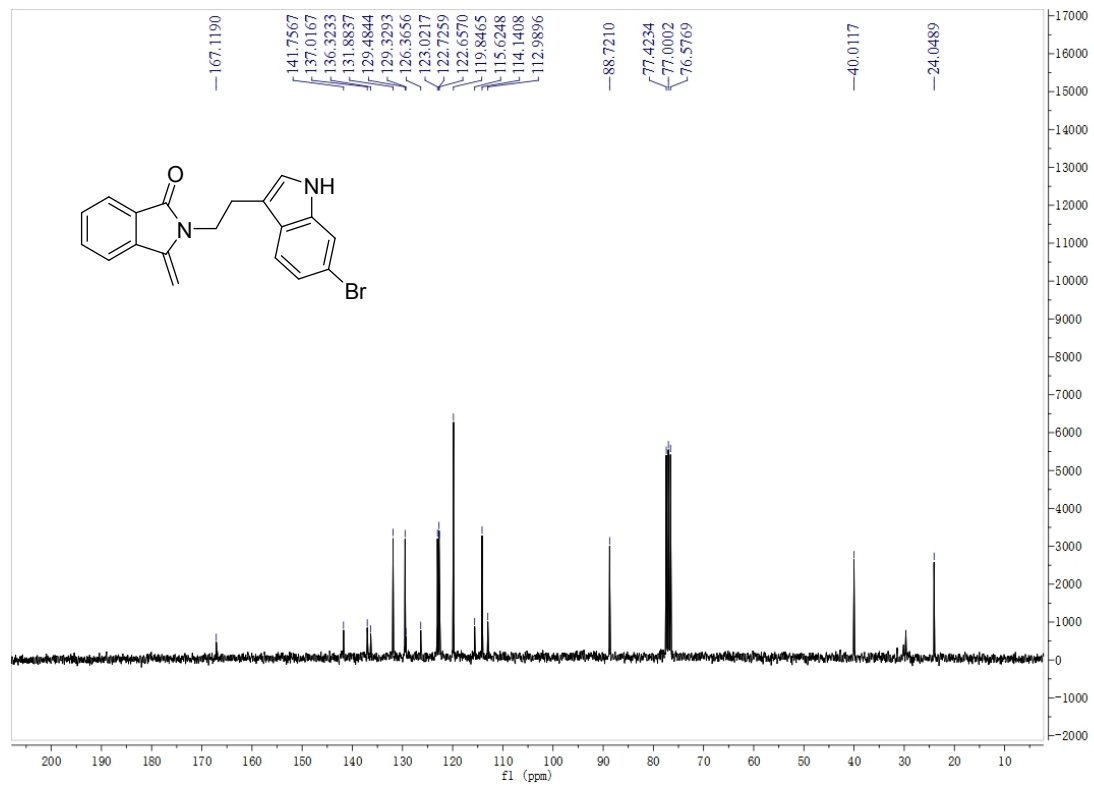

## 2-(2-(7-methyl-1H-indol-3-yl)ethyl)-3-methyleneisoindolin-1-one (1p)

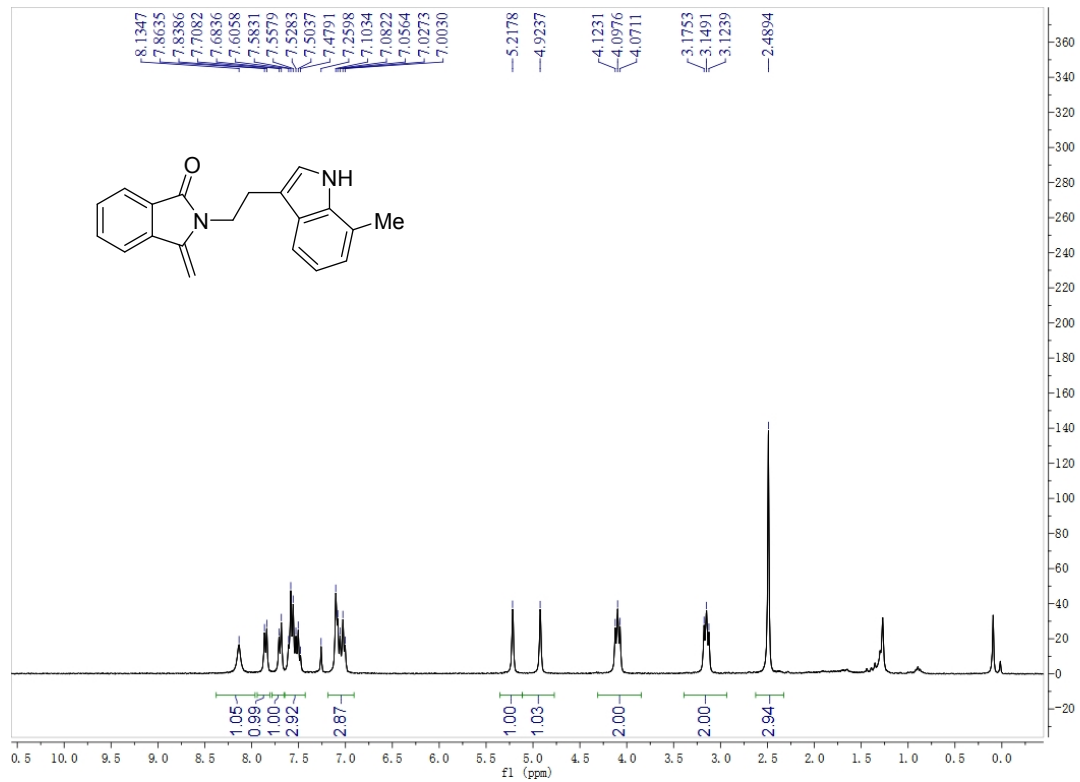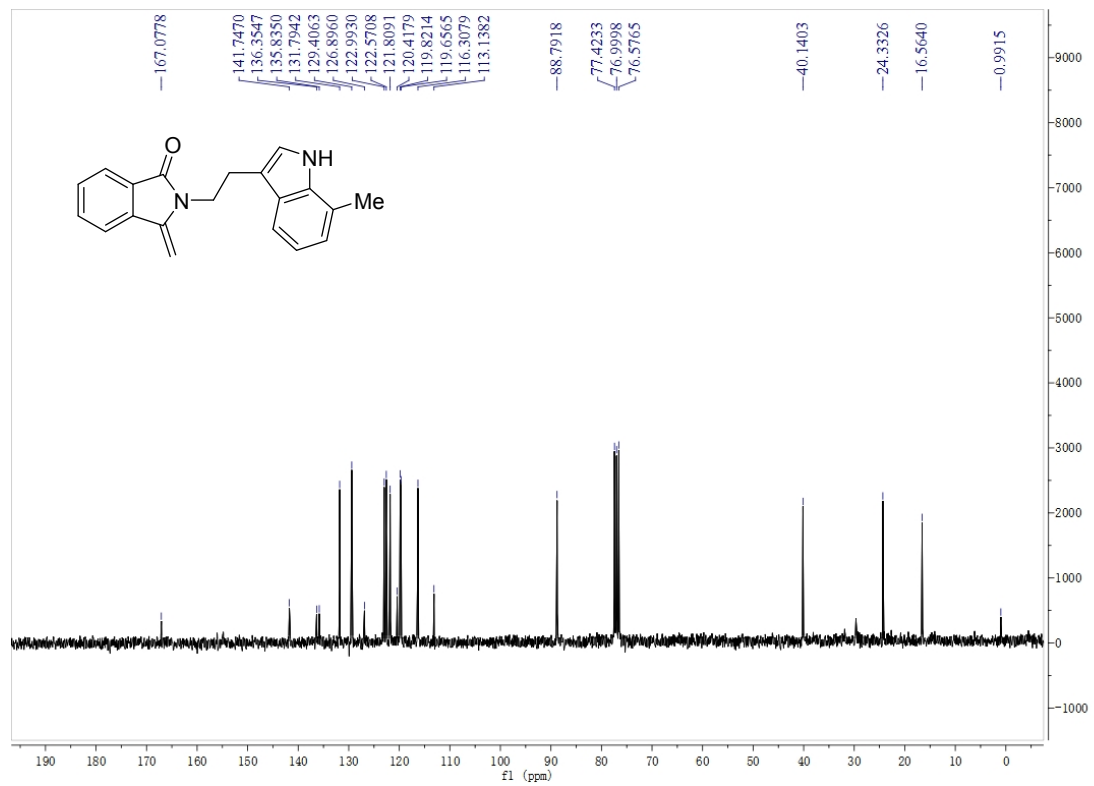

## 2-(2-(4,6-dimethyl-1H-indol-3-yl)ethyl)-3-methyleneisoindolin-1-one (1q)

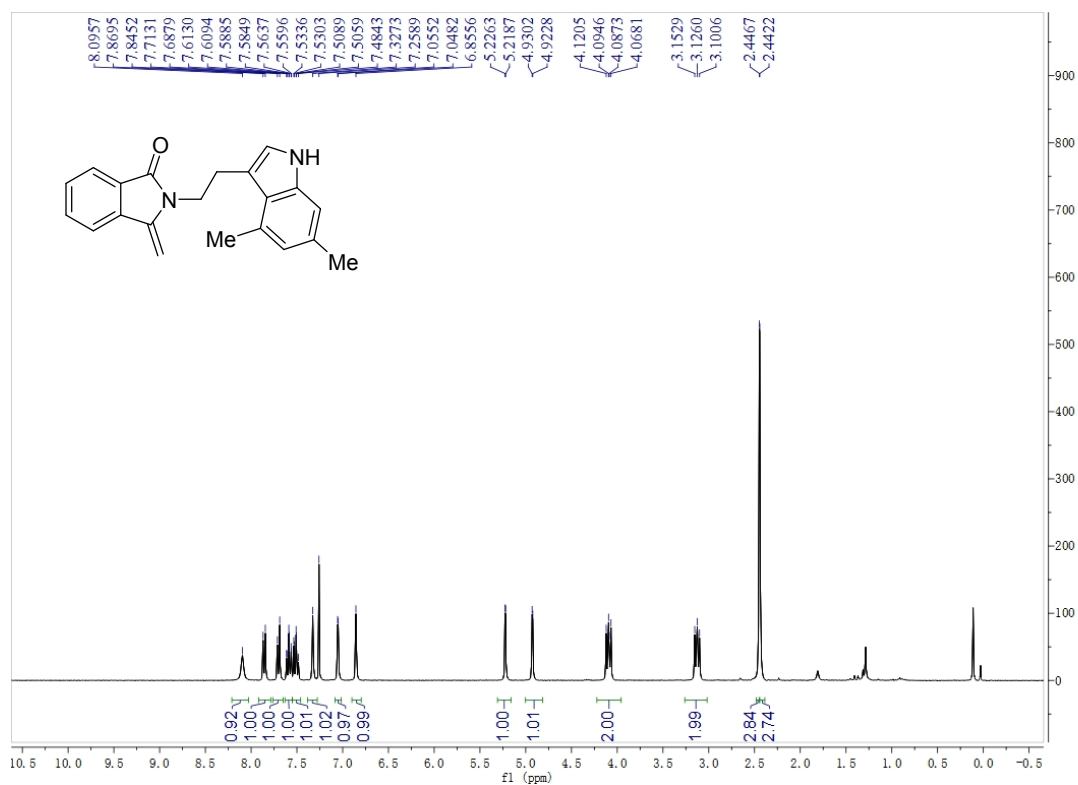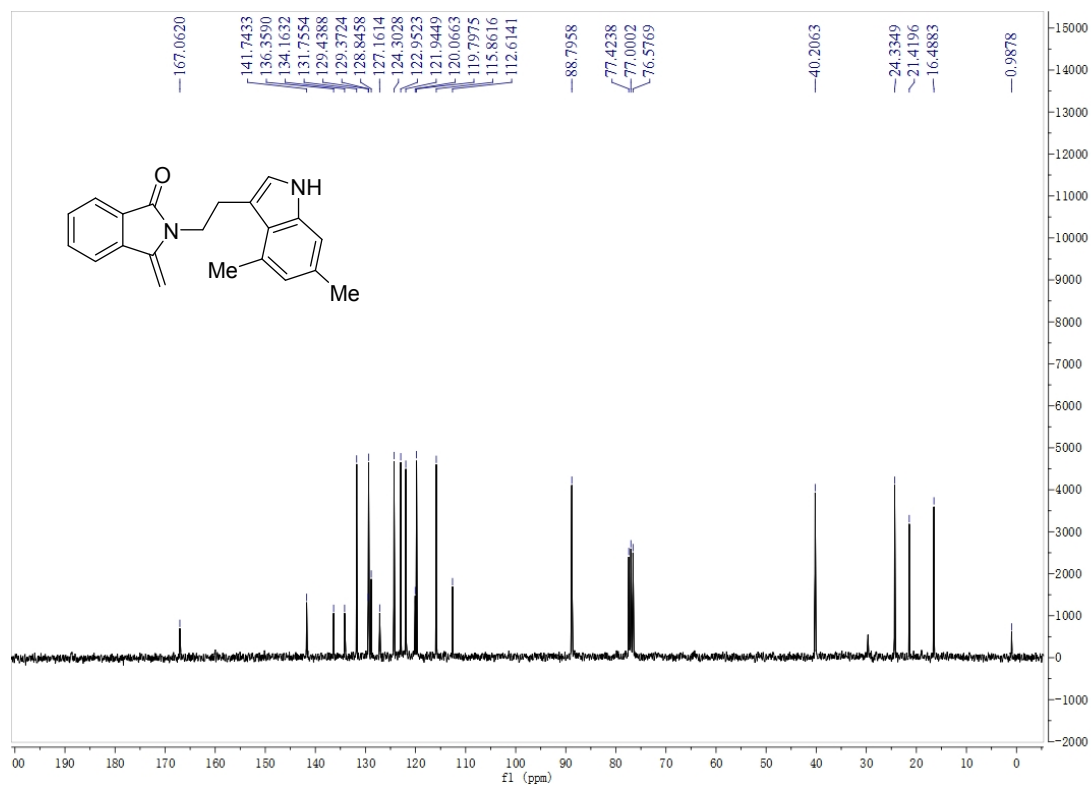

## 2-(2-(5,7-dimethyl-1H-indol-3-yl)ethyl)-3-methyleneisoindolin-1-one (1r)

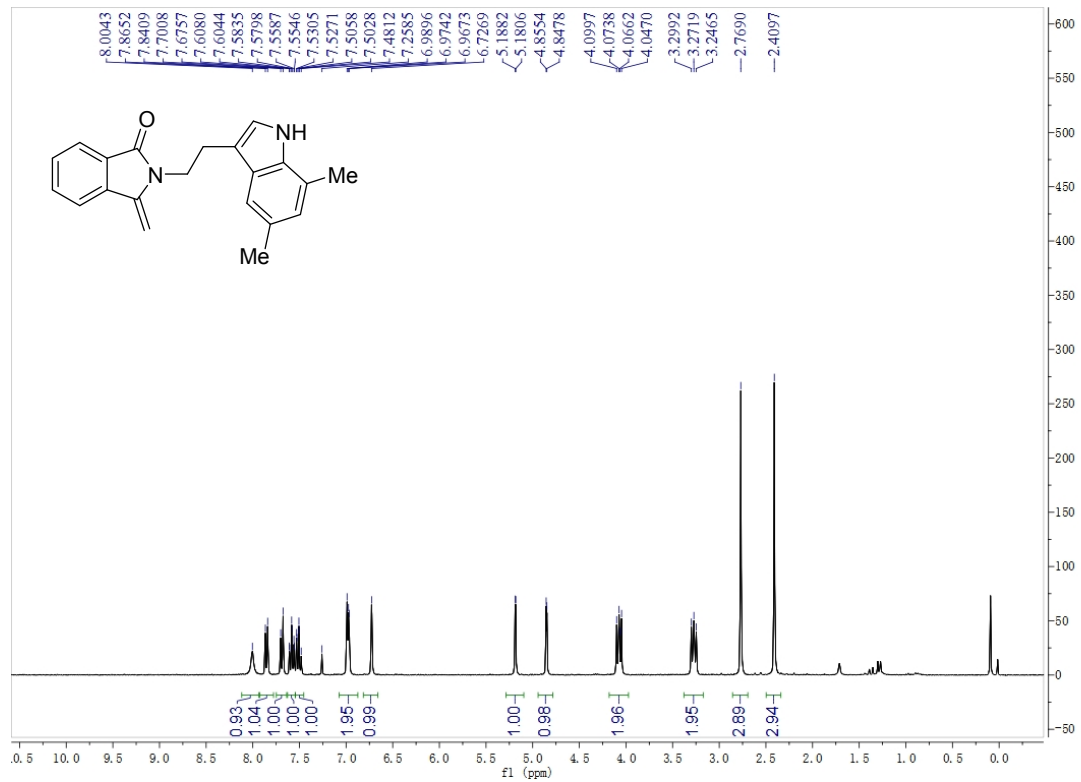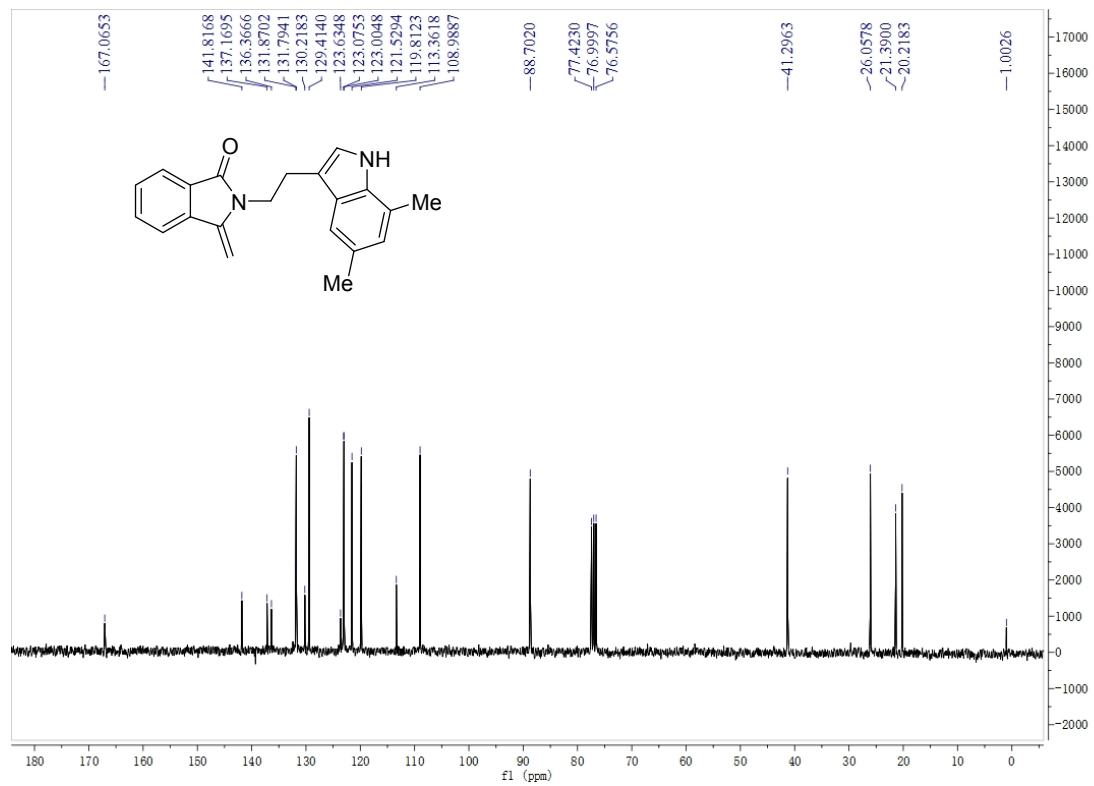



**13b-methyl-7,8,13,13b-tetrahydro-5H-benzo[1,2]indolizino[8,7-b]indol-5-one(2a)**

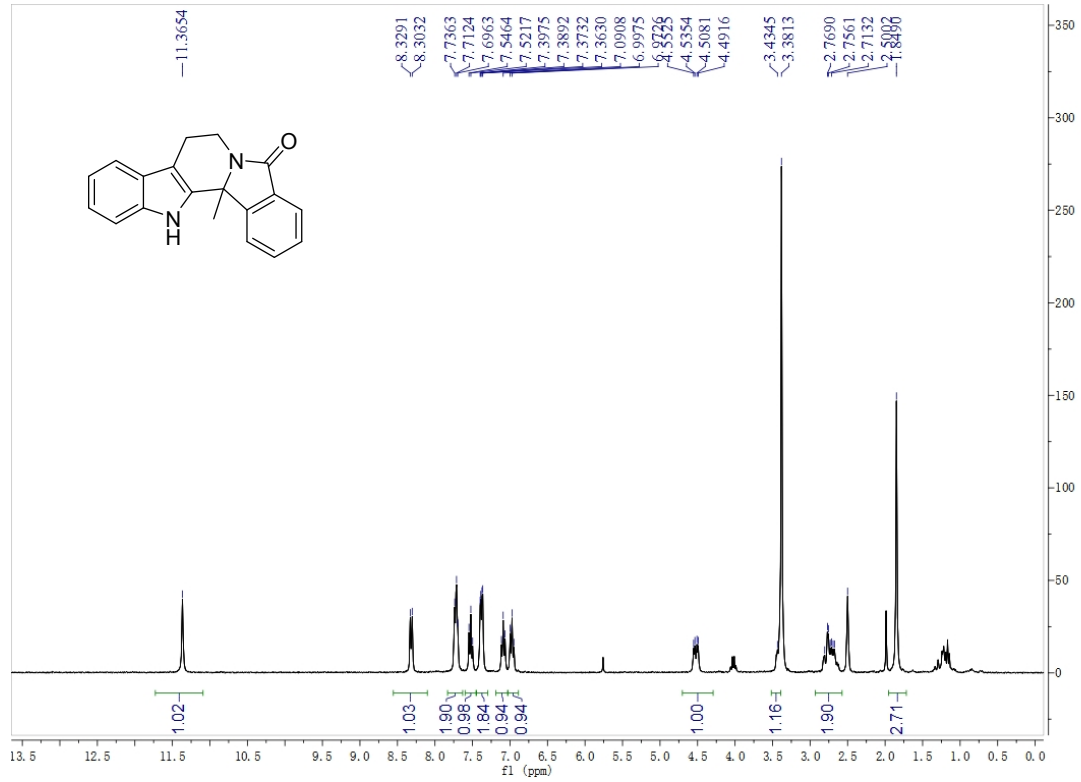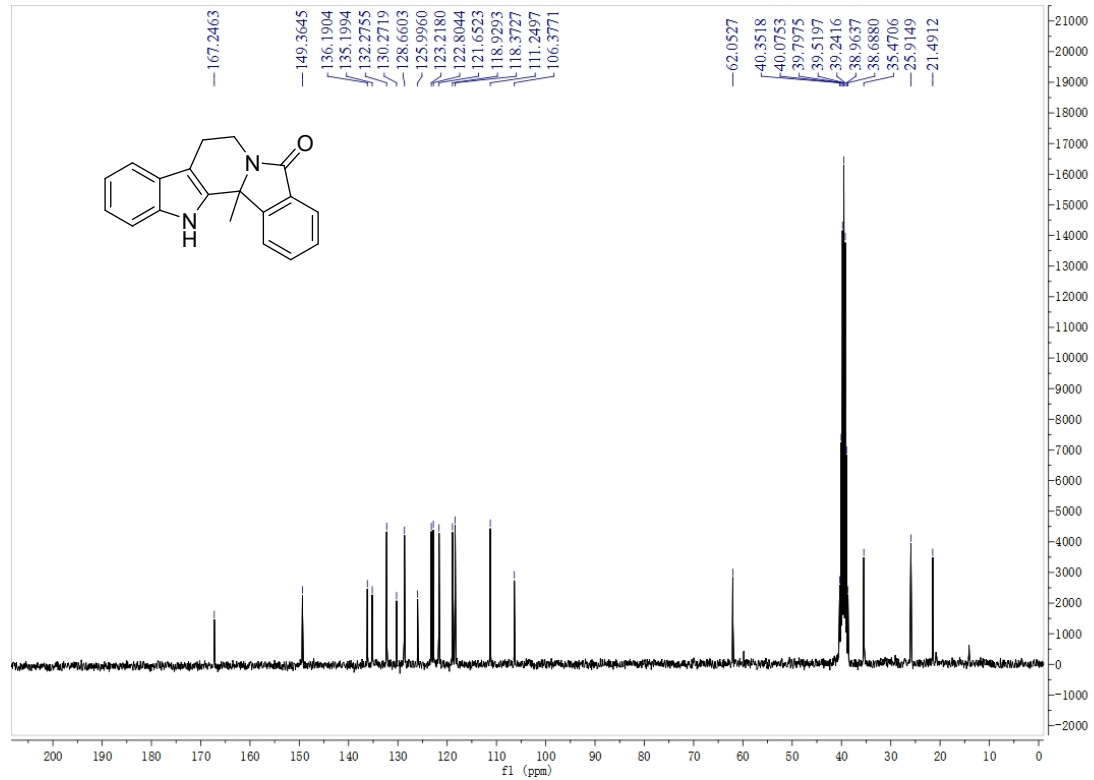

1-fluoro-13b-methyl-7,8,13,13b-tetrahydro-5H-benzo[1,2]indolizino[8,7-b]indol-5-one (2b)

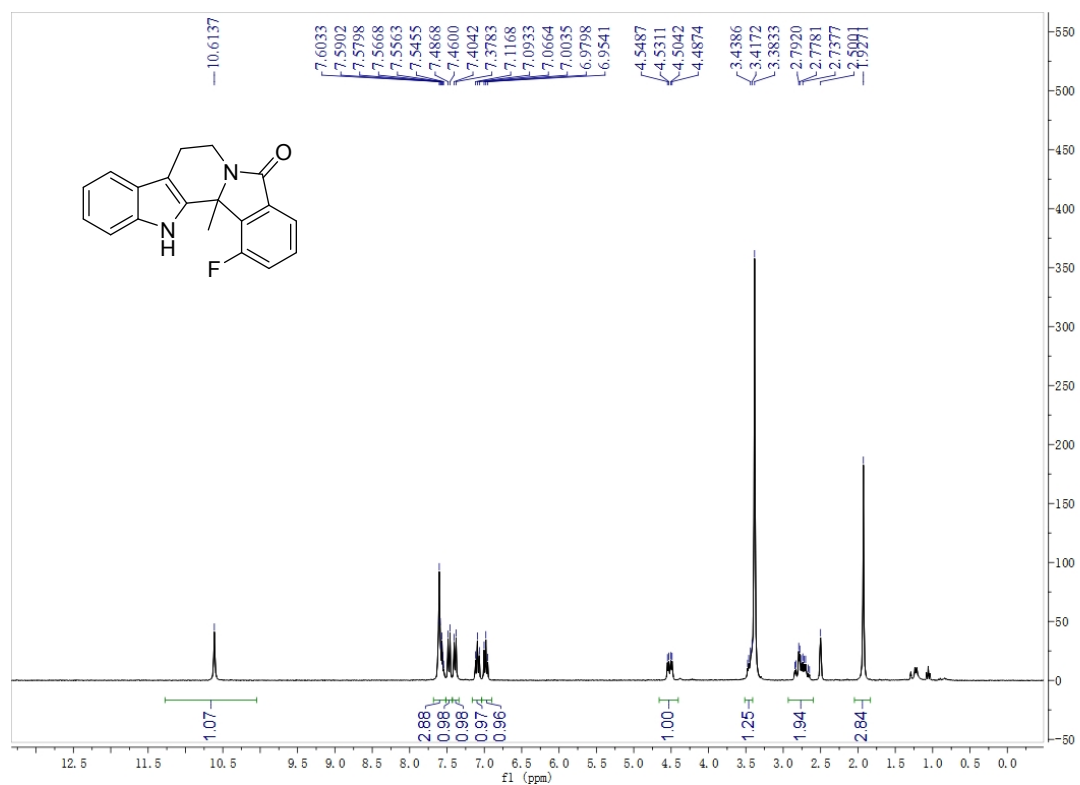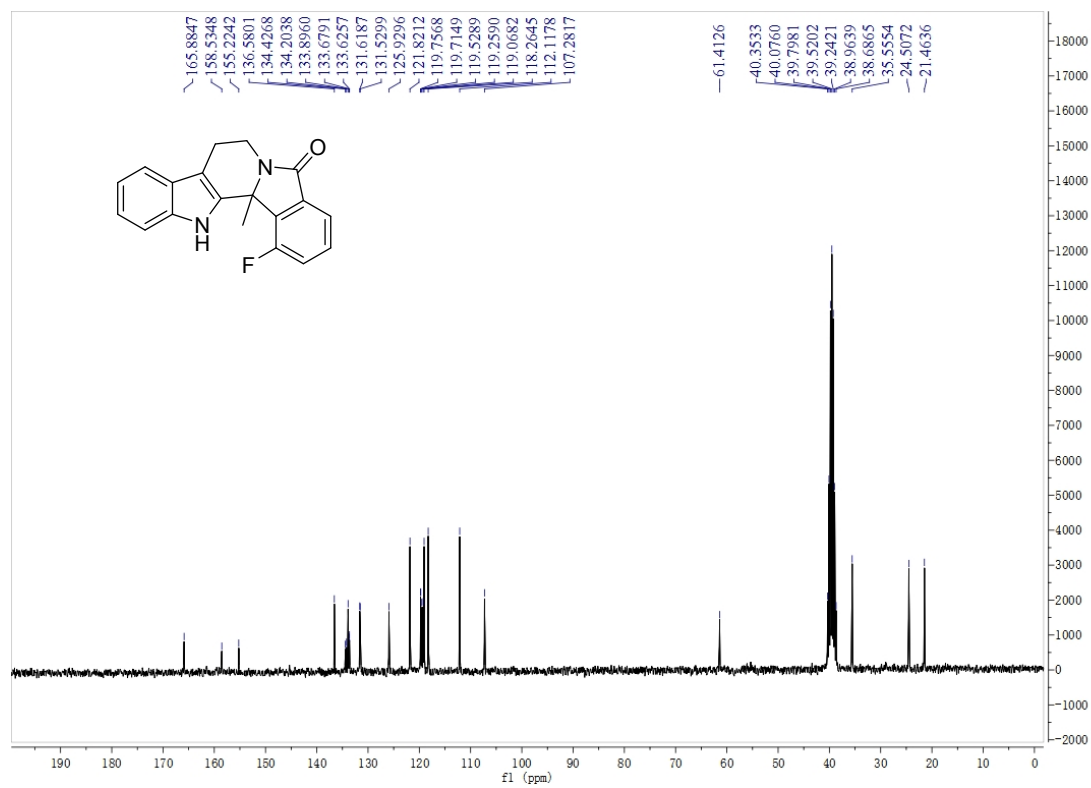

2-fluoro-13b-methyl-7,8,13,13b-tetrahydro-5H-benzo[1,2]indolizino[8,7-b]indol-5-one (2c)

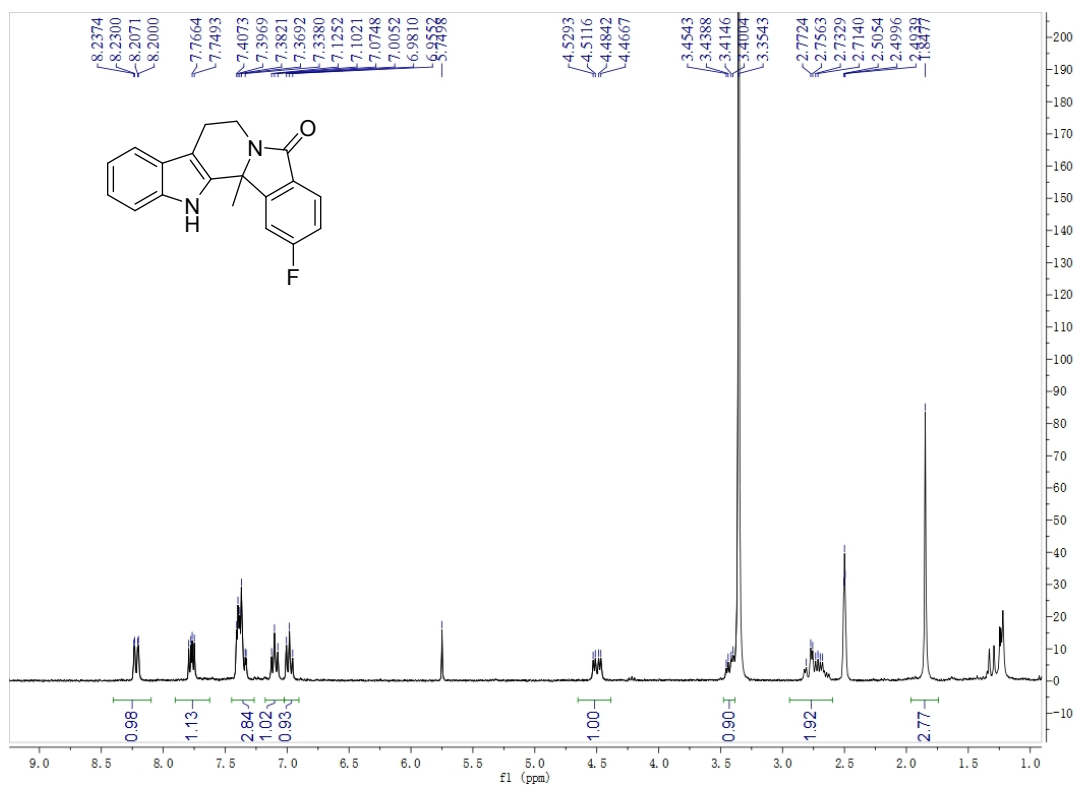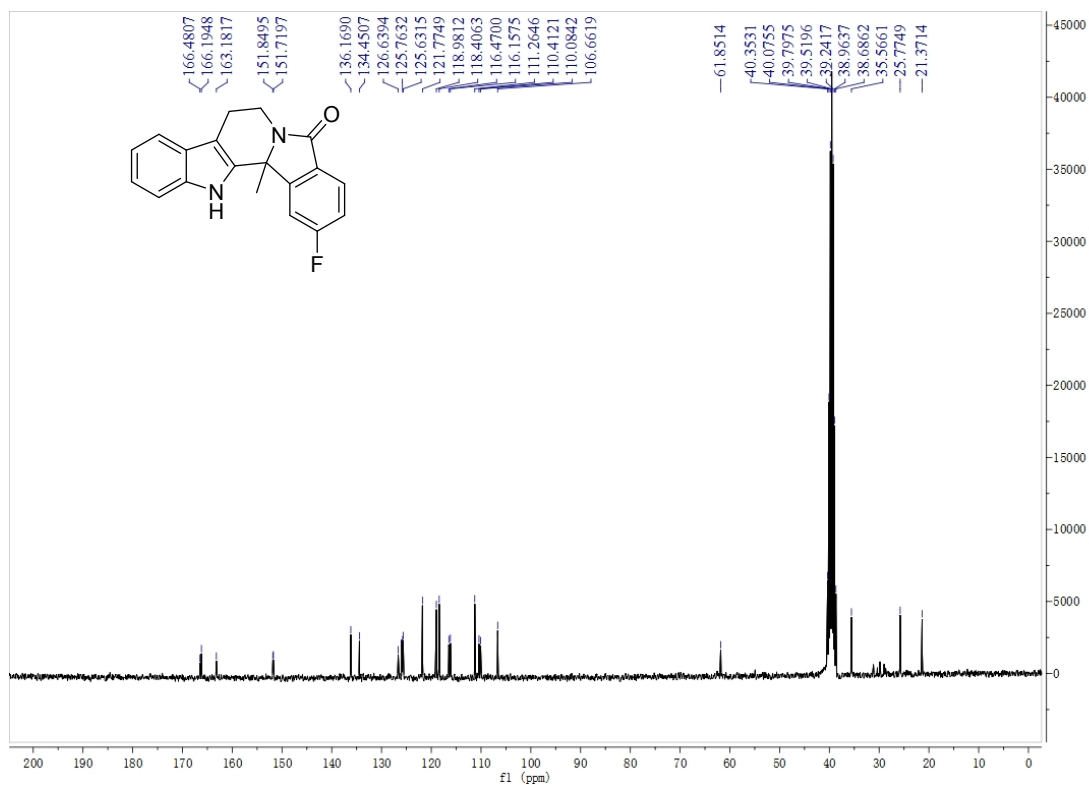

3-fluoro-13b-methyl-7,8,13,13b-tetrahydro-5H-benzo[1,2]indolizino[8,7-b]indol-5-one (2d)

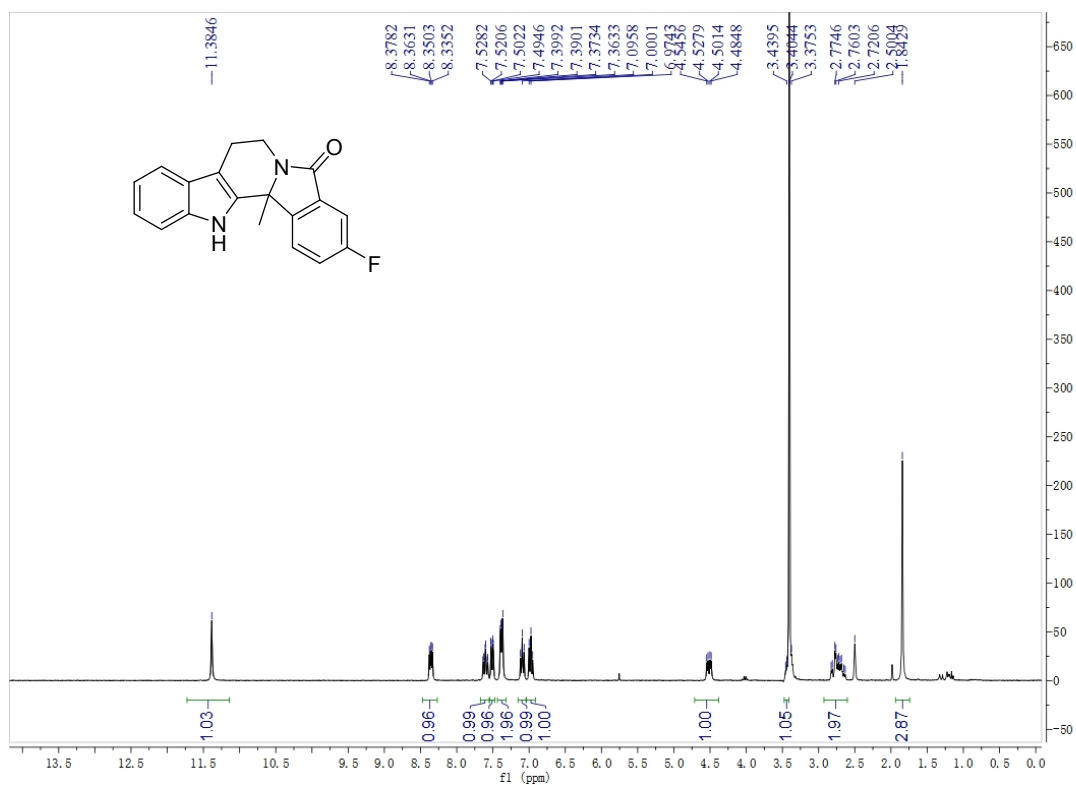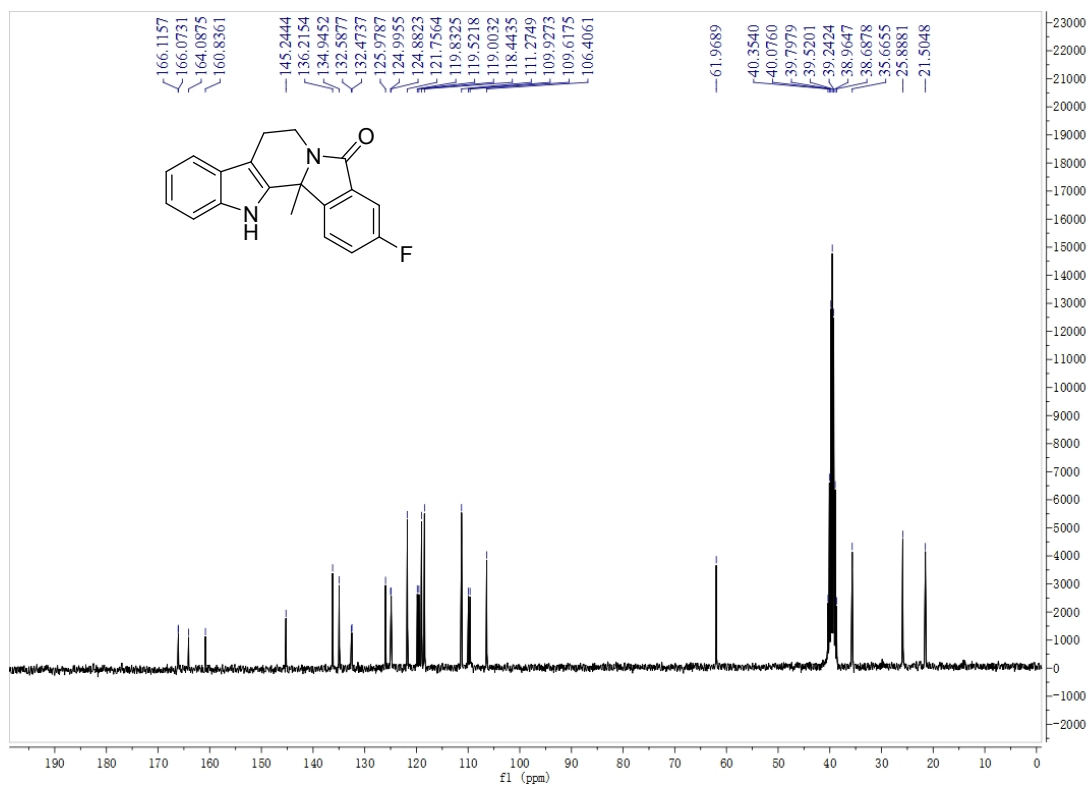

3-chloro-13b-methyl-7,8,13,13b-tetrahydro-5H-benzo[1,2]indolizino[8,7-b]indol-5-one (2e)

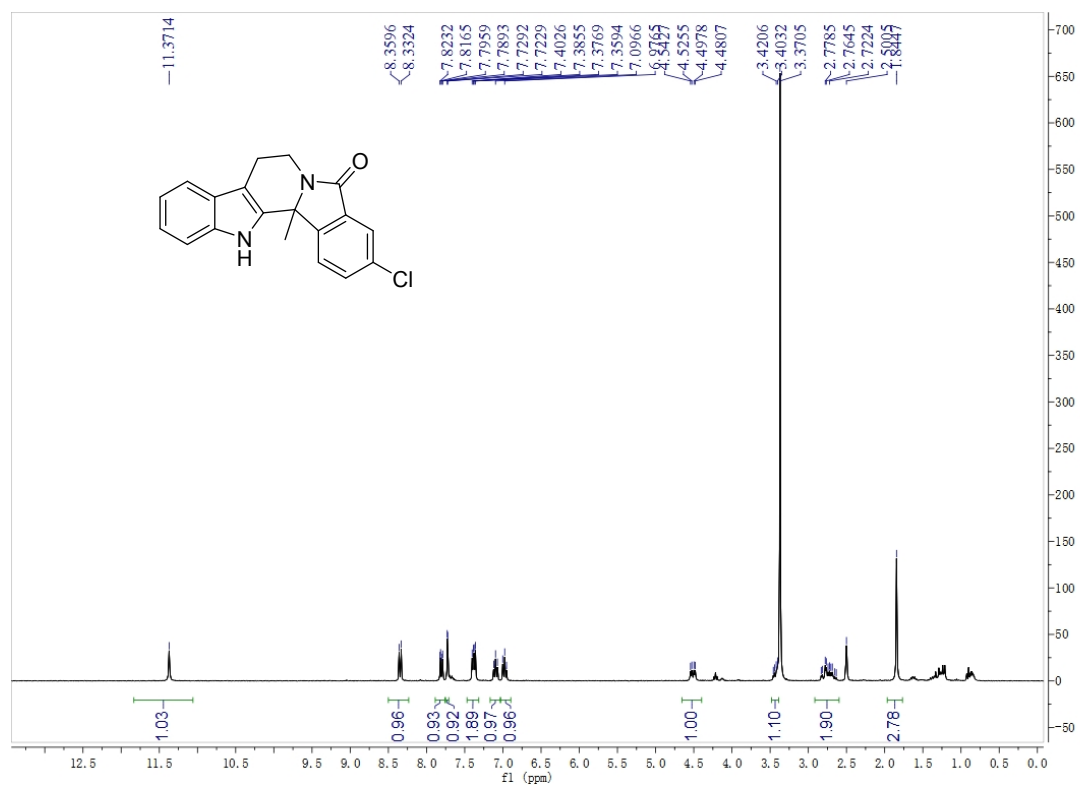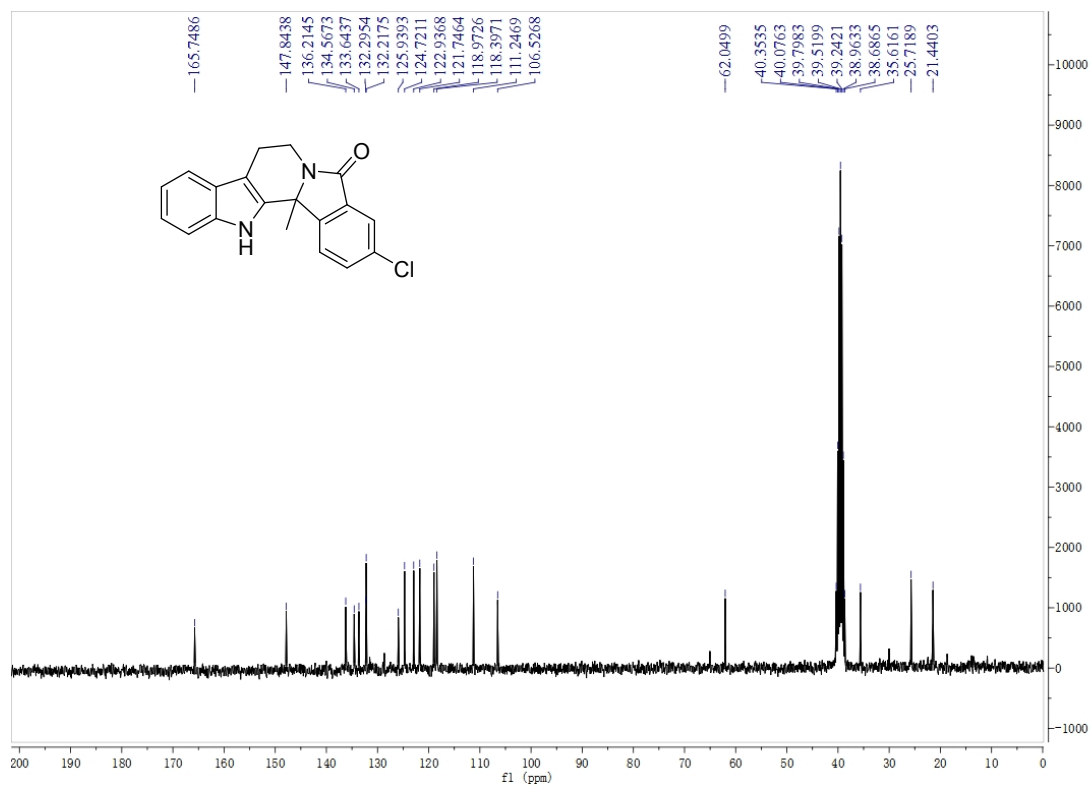

**3-bromo-13b-methyl-7,8,13,13b-tetrahydro-5H-benzo[1,2]indolizino[8,7-b]indol-5-one (2f)**

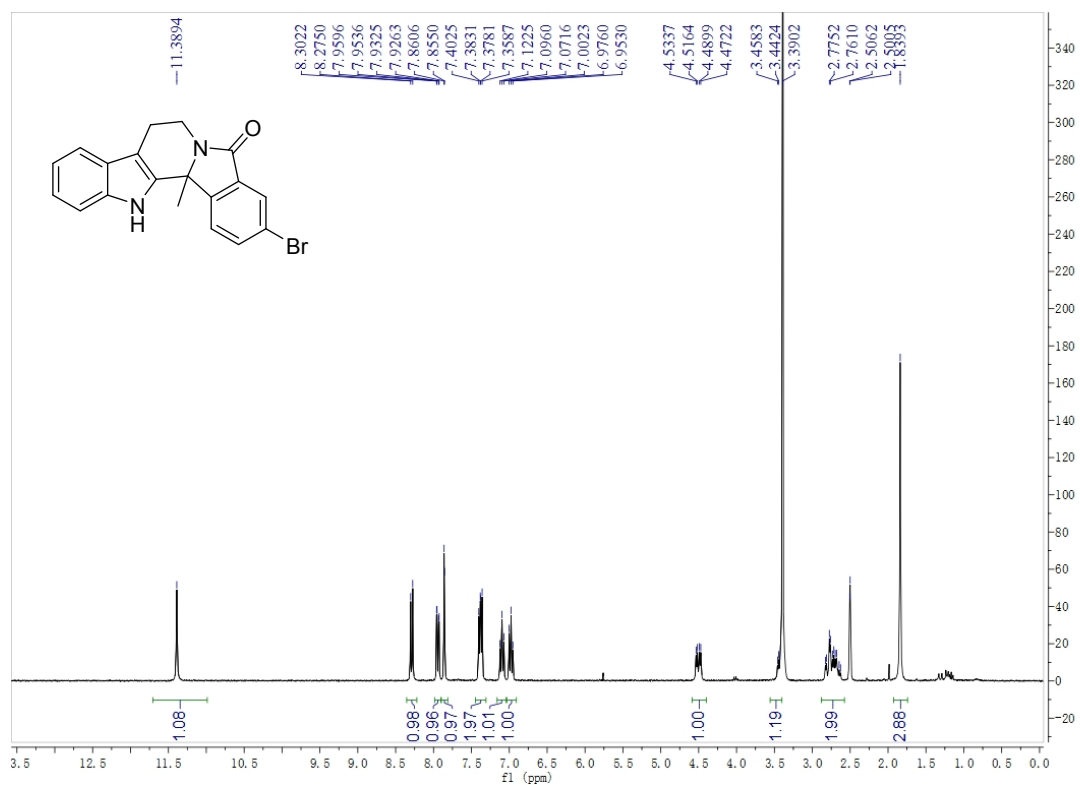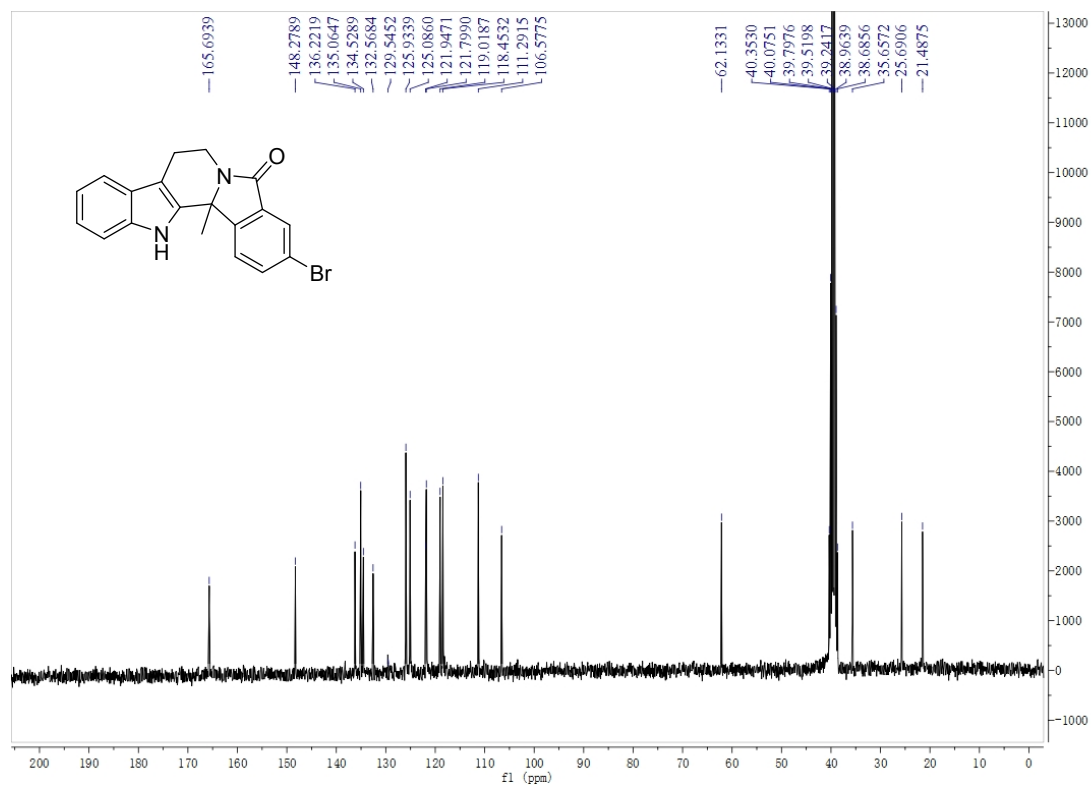

3,13b-dimethyl-7,8,13,13b-tetrahydro-5H-benzo[1,2]indolizino[8,7-b]indol-5-one (2g)

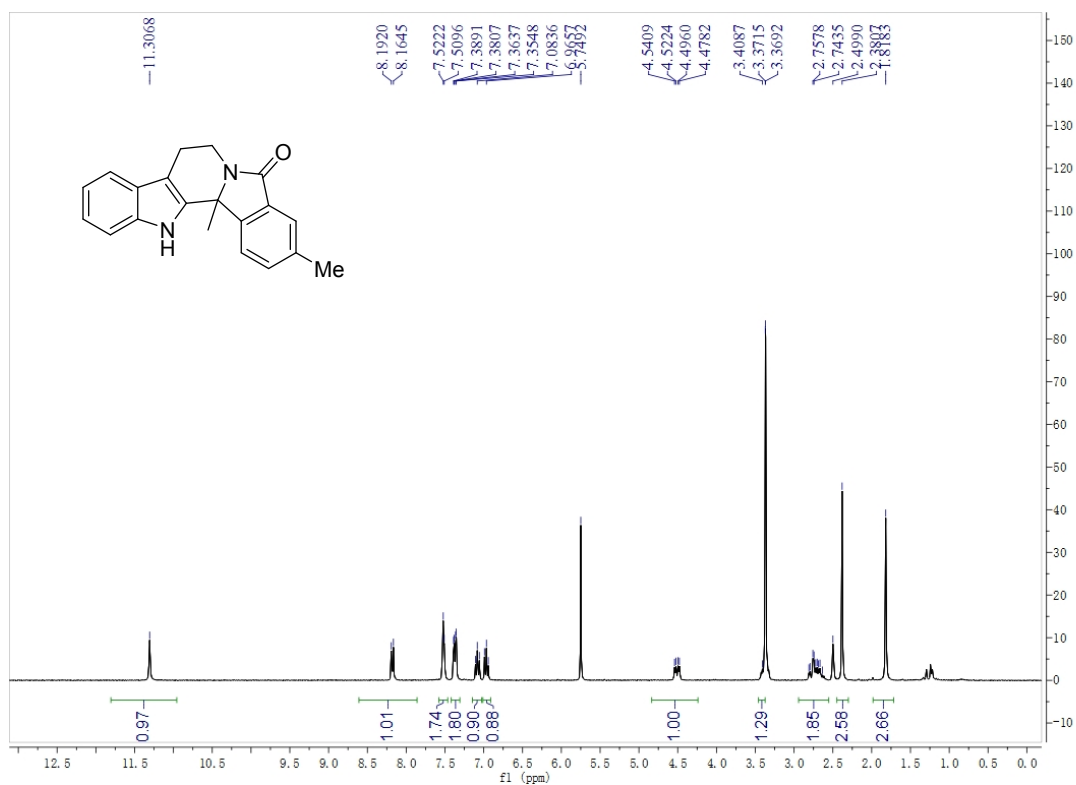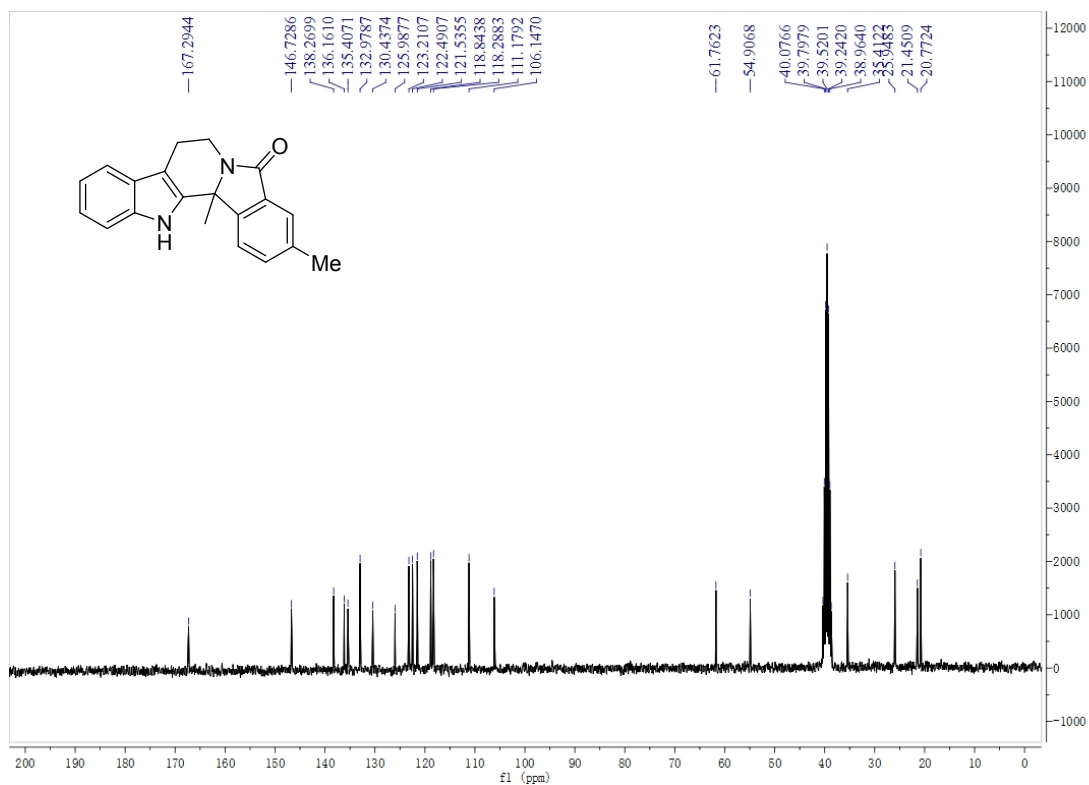

**13b-benzyl-7,8,13,13b-tetrahydro-5H-benzo[1,2]indolizino[8,7-b]indol-5-one (2h)**

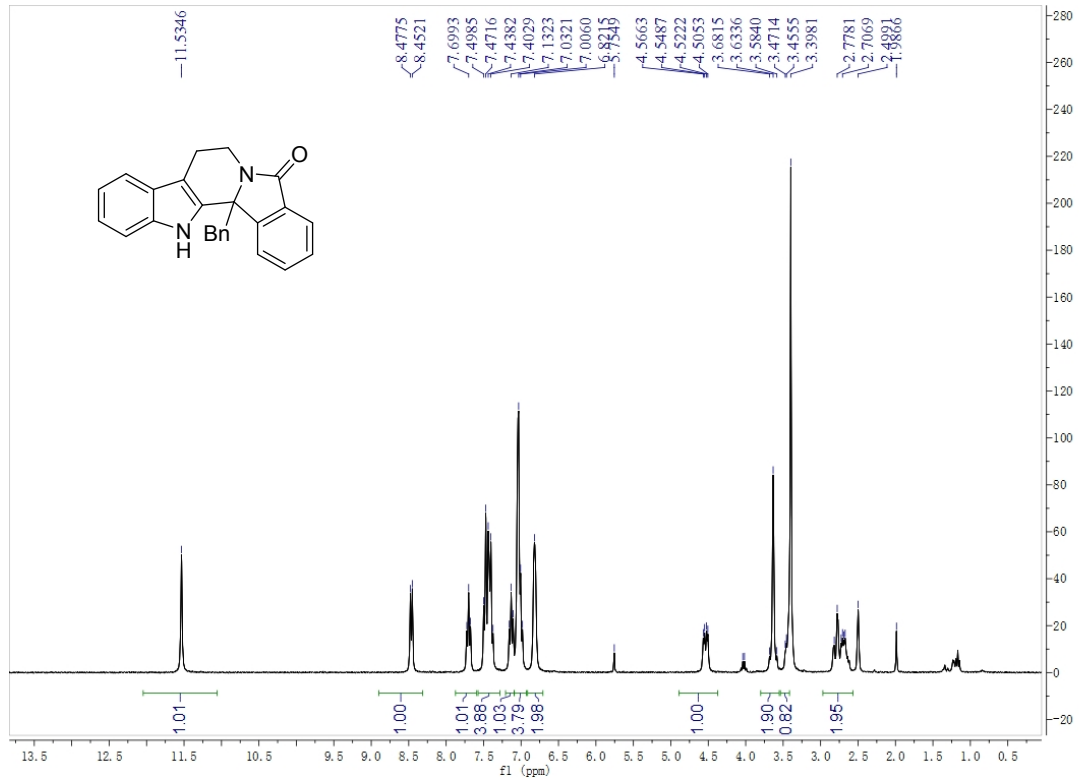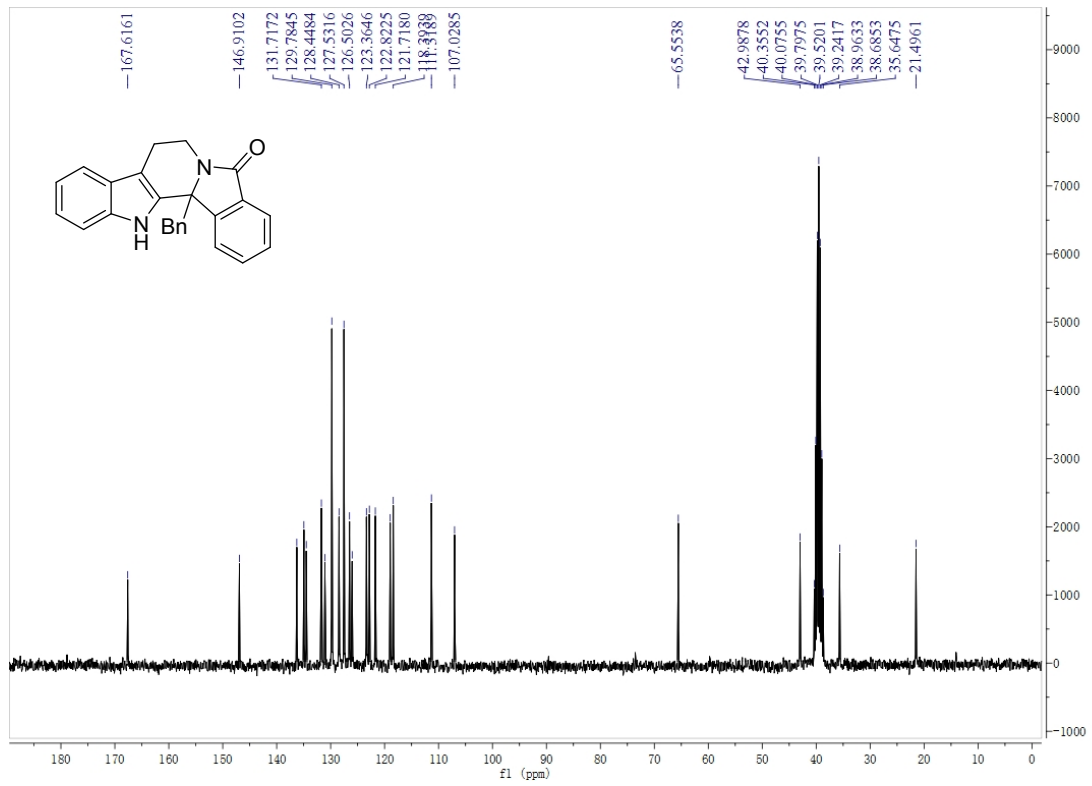



9-fluoro-13b-methyl-7,8,13,13b-tetrahydro-5H-benzo[1,2]indolizino[8,7-b]indol-5-one (2i)

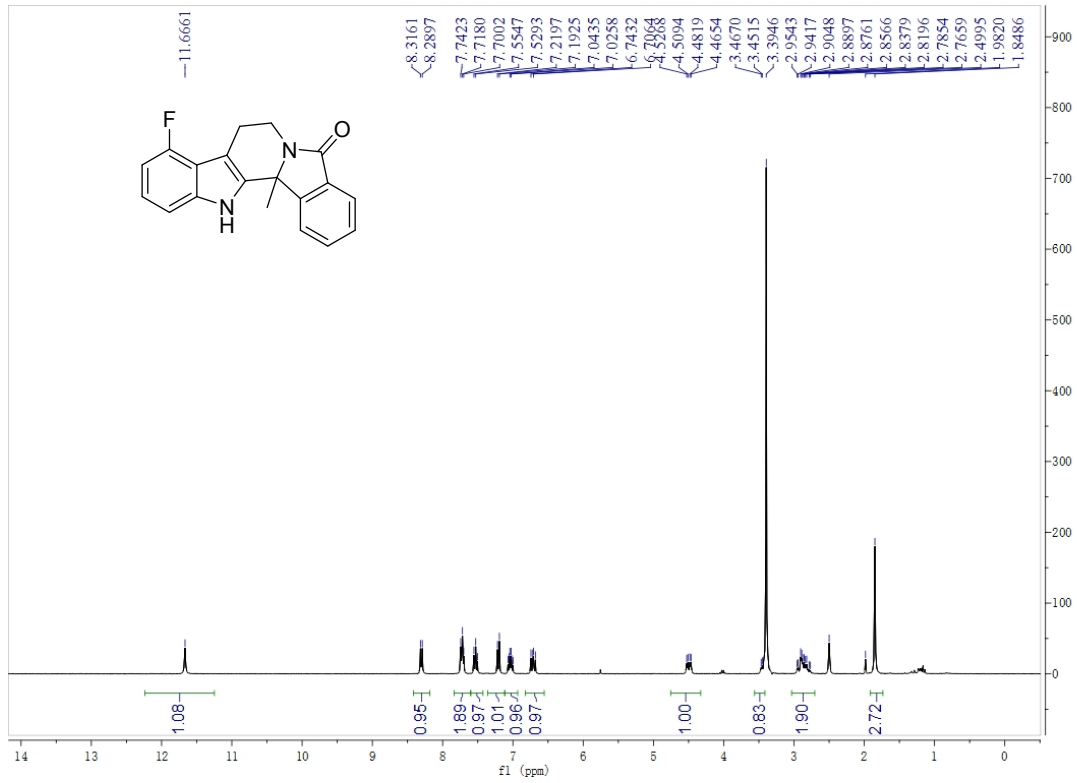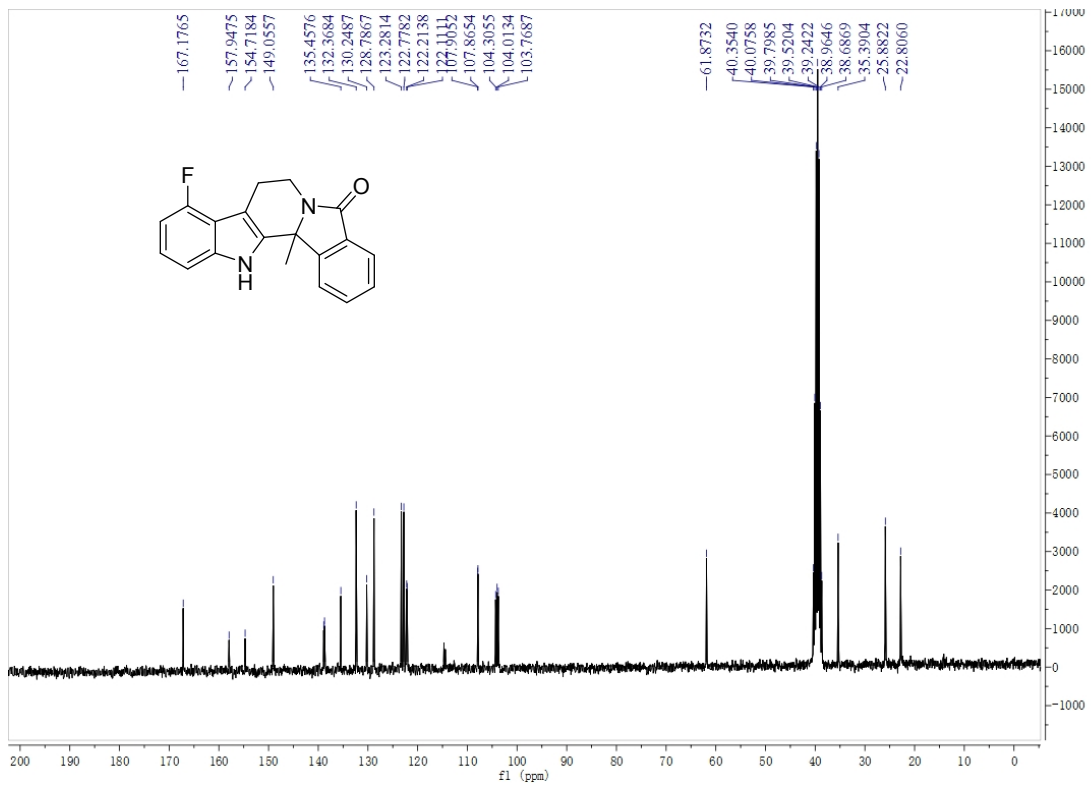

10-bromo-13b-methyl-7,8,13,13b-tetrahydro-5H-benzo[1,2]indolizino[8,7-b]indol-5-one (2j)

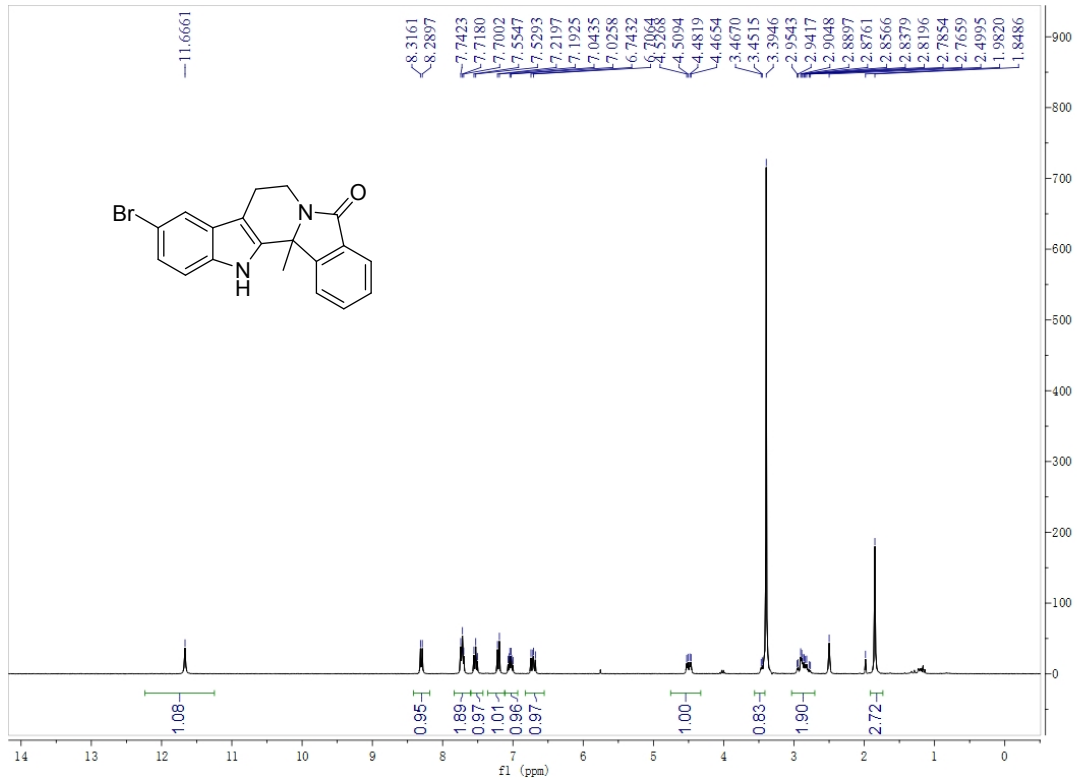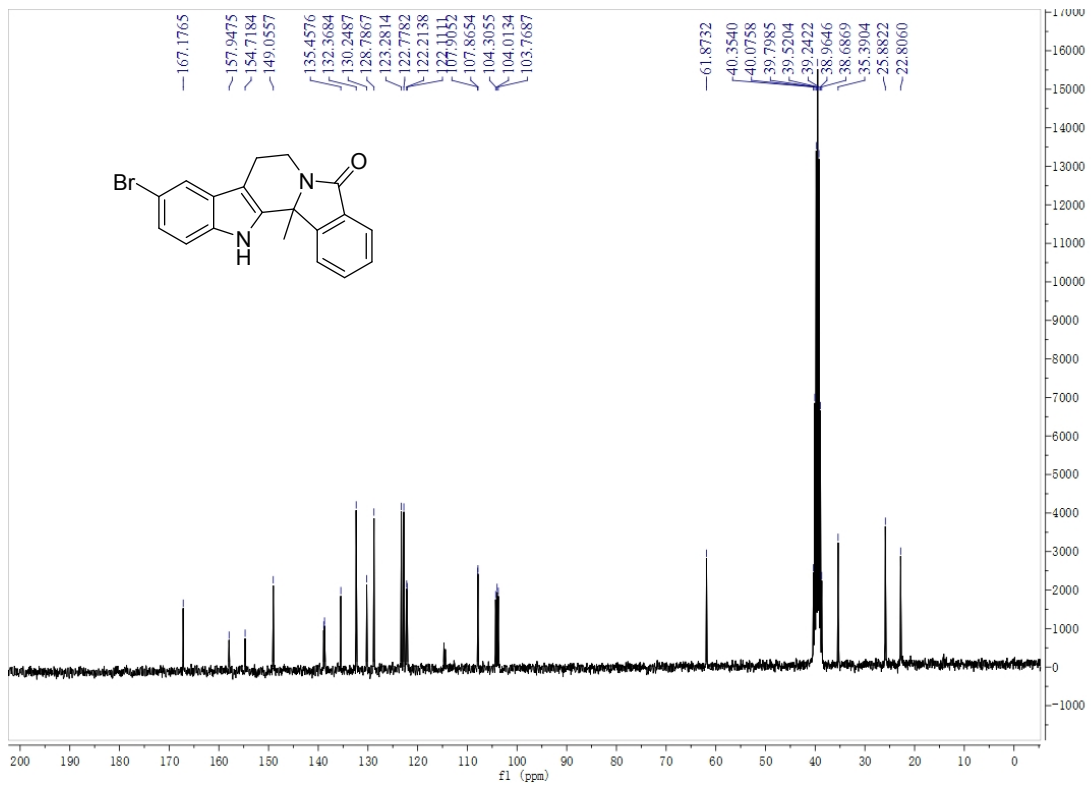

10-methoxy-13b-methyl-7,8,13,13b-tetrahydro-5H-benzo[1,2]indolizino[8,7-b]indol-5-one (2k)

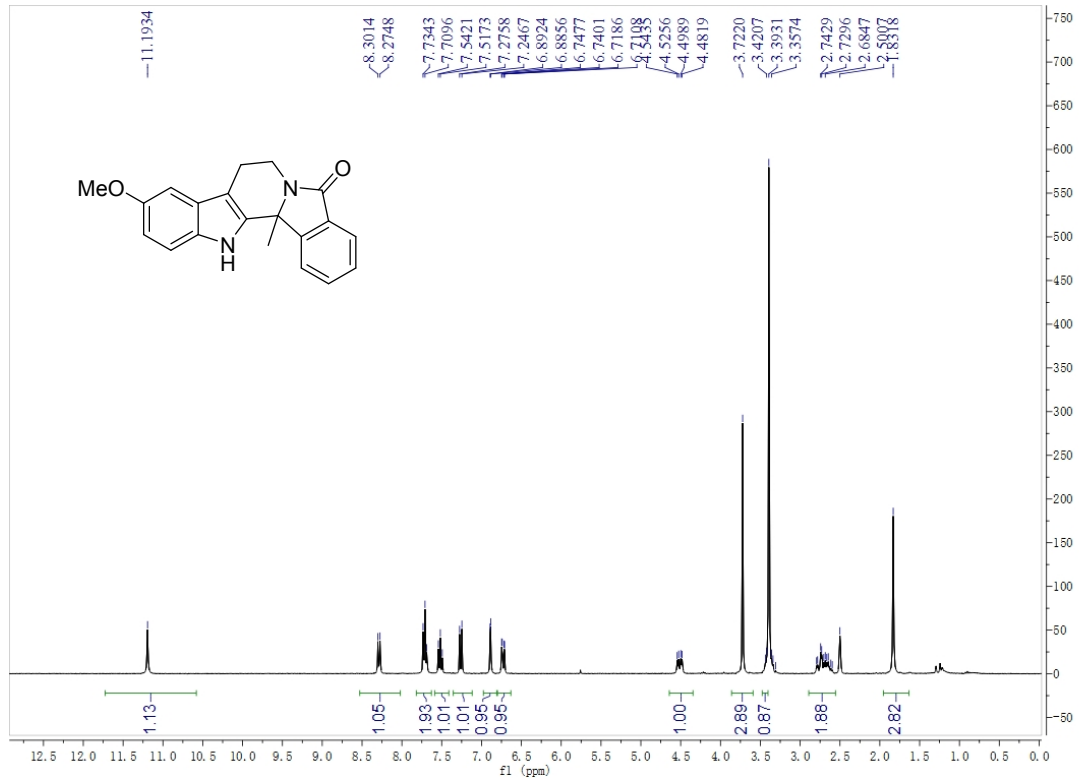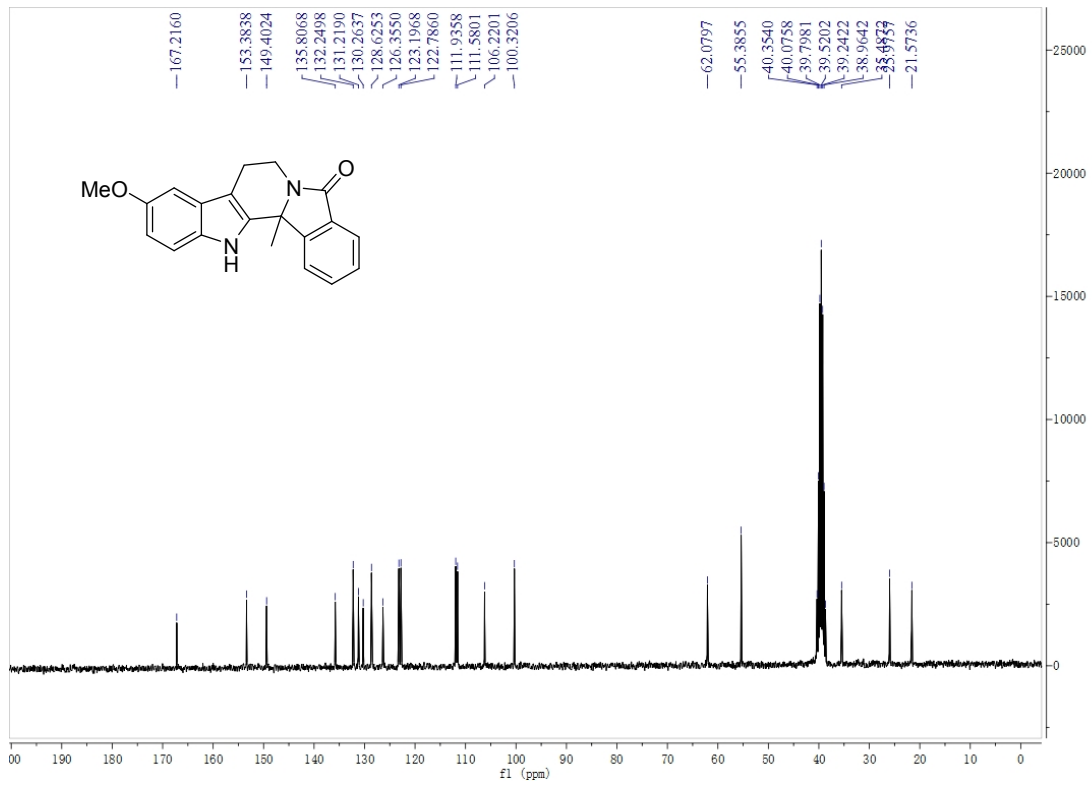

10-(benzyloxy)-13b-methyl-7,8,13,13b-tetrahydro-5H-benzo[1,2]indolizino[8,7-b]indol-5-one (2l)

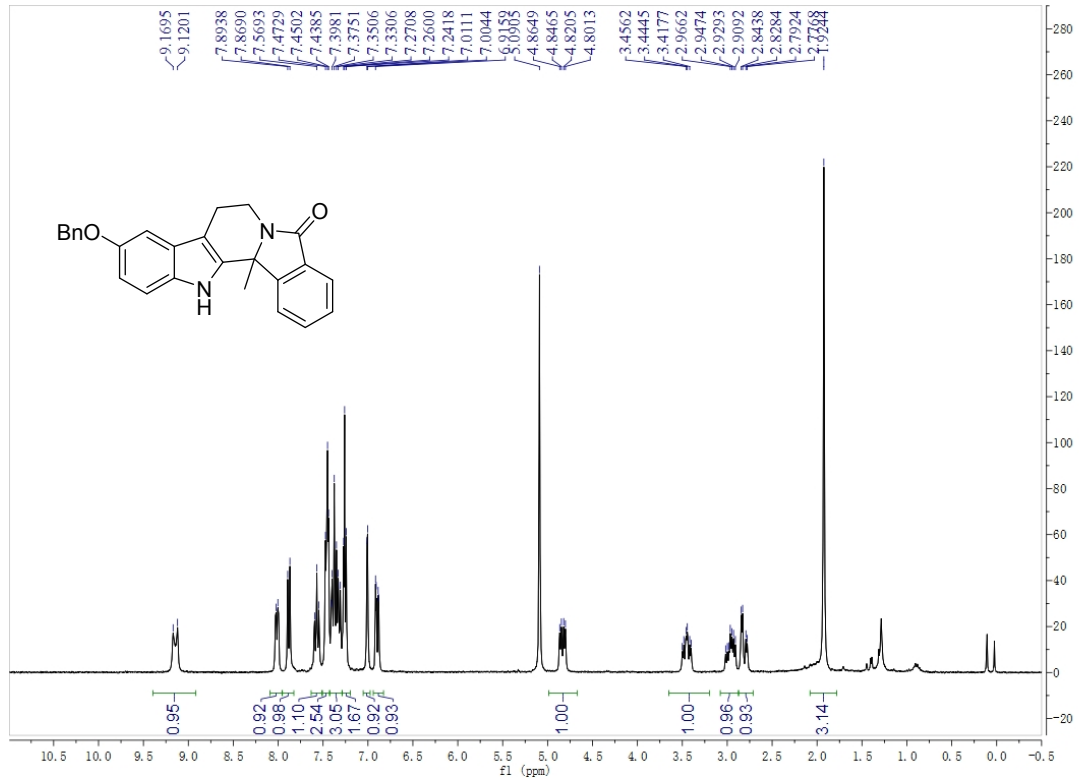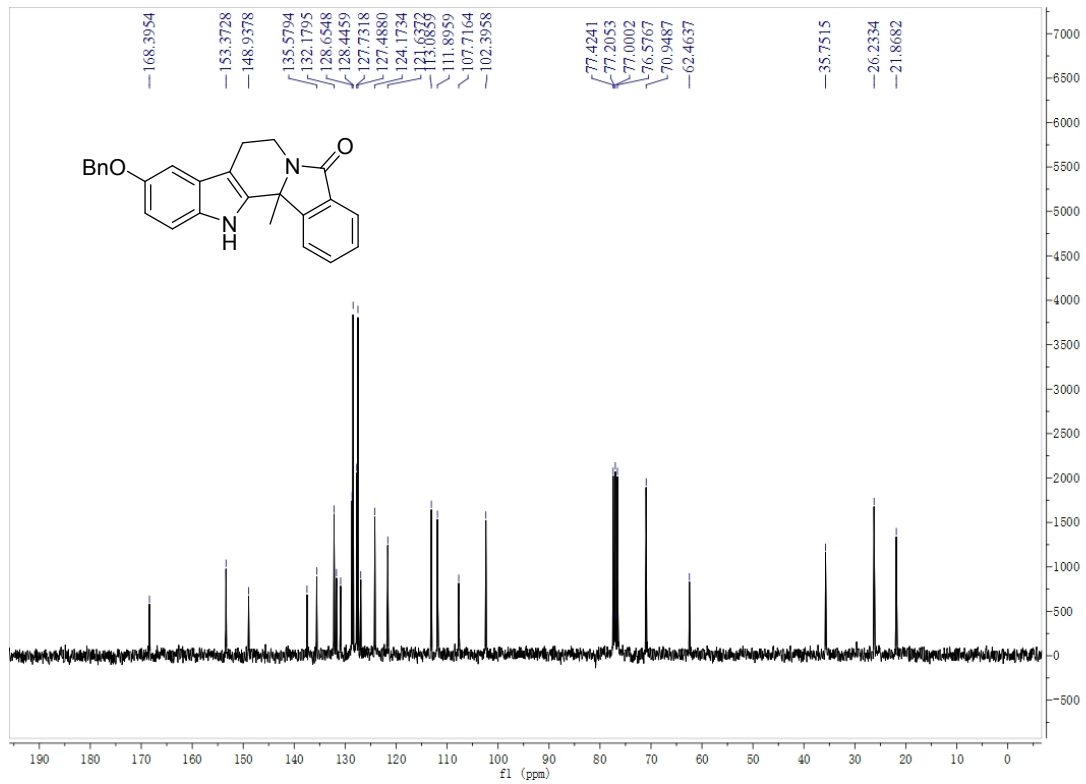

10-ethyl-13b-methyl-7,8,13,13b-tetrahydro-5H-benzo[1,2]indolizino[8,7-b]indol-5-one (2m)

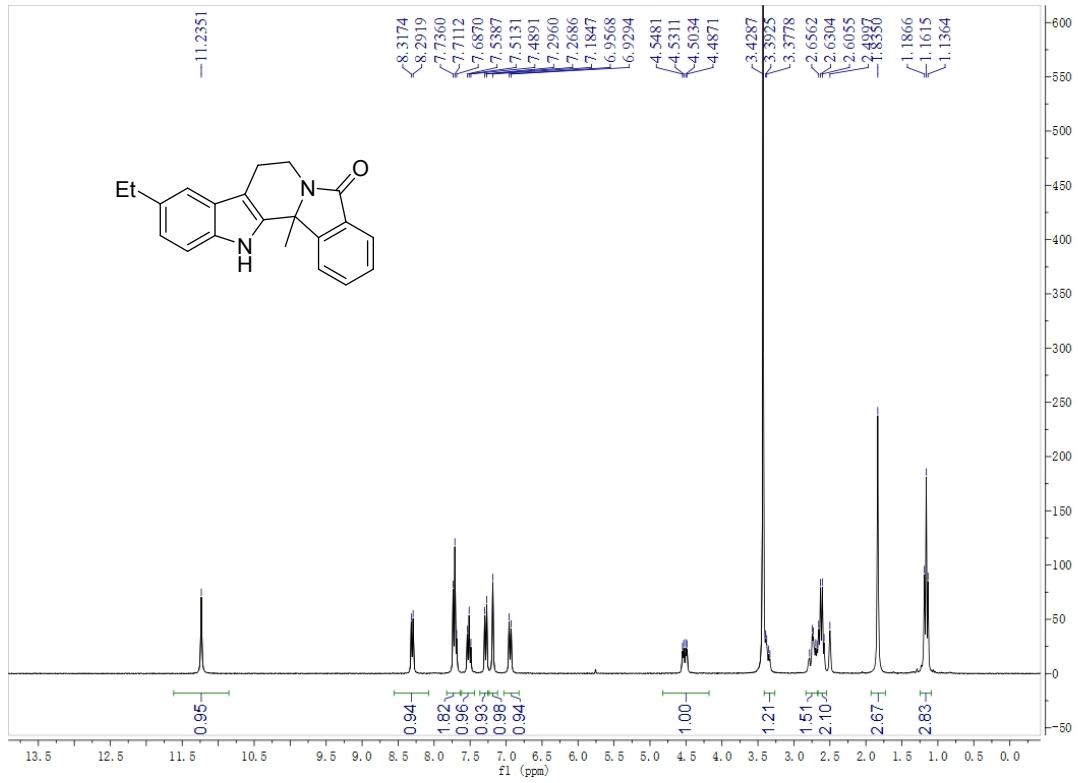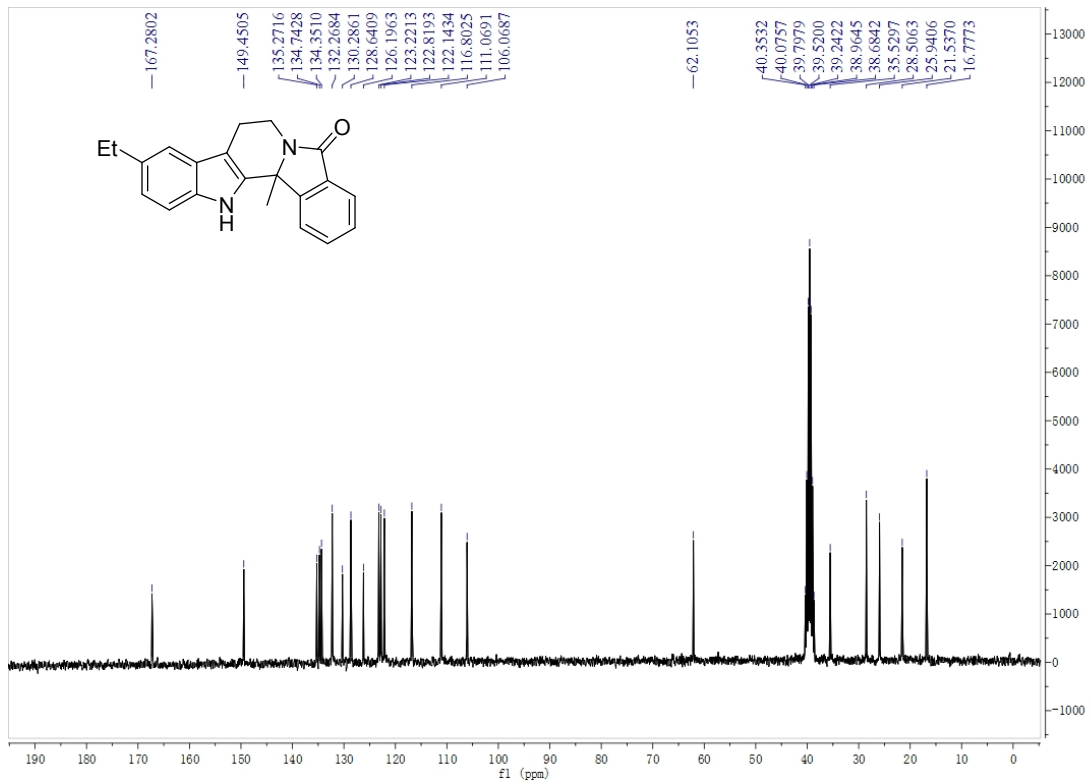

**10-isopropyl-13b-methyl-7,8,13,13b-tetrahydro-5H-benzo[1,2]indolizino[8,7-b]indol-5-one (2n)**

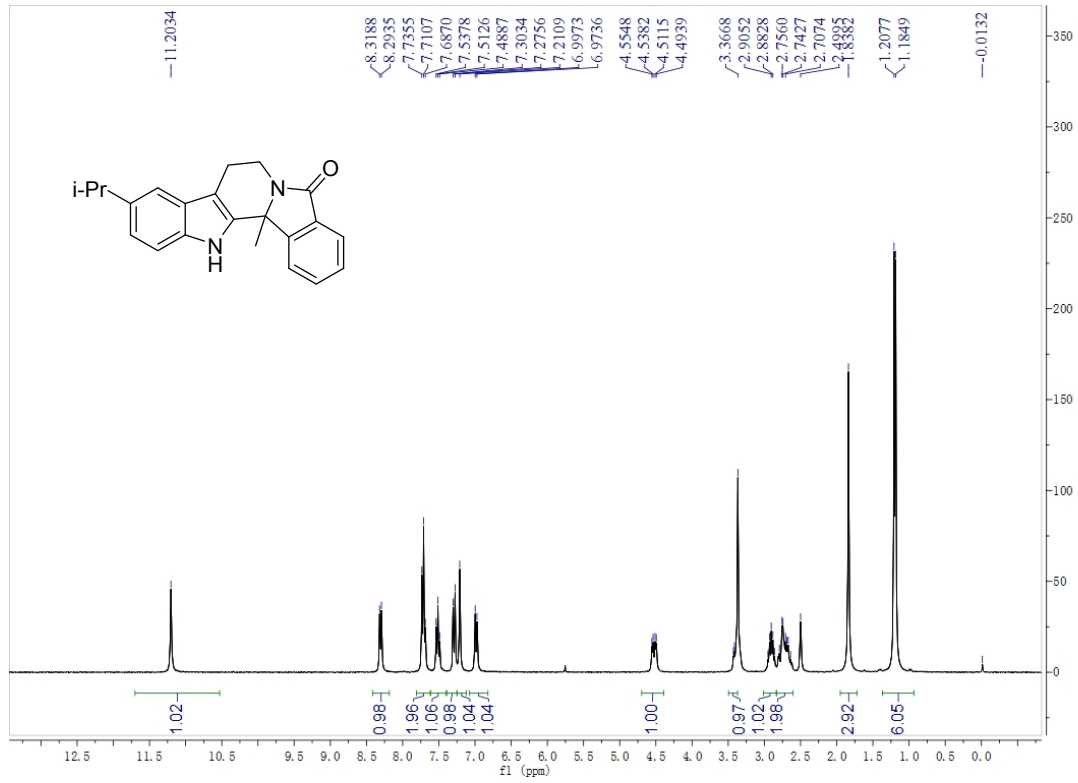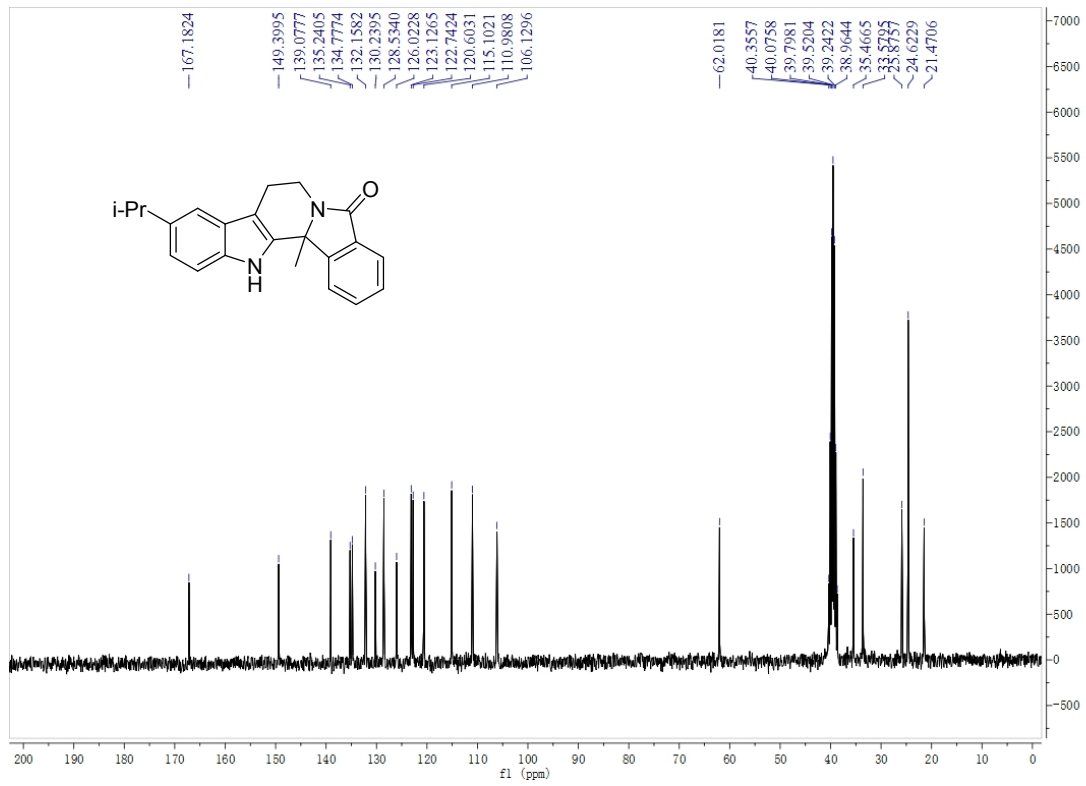

11-bromo-13b-methyl-7,8,13,13b-tetrahydro-5H-benzo[1,2]indolizino[8,7-b]indol-5-one (2o)

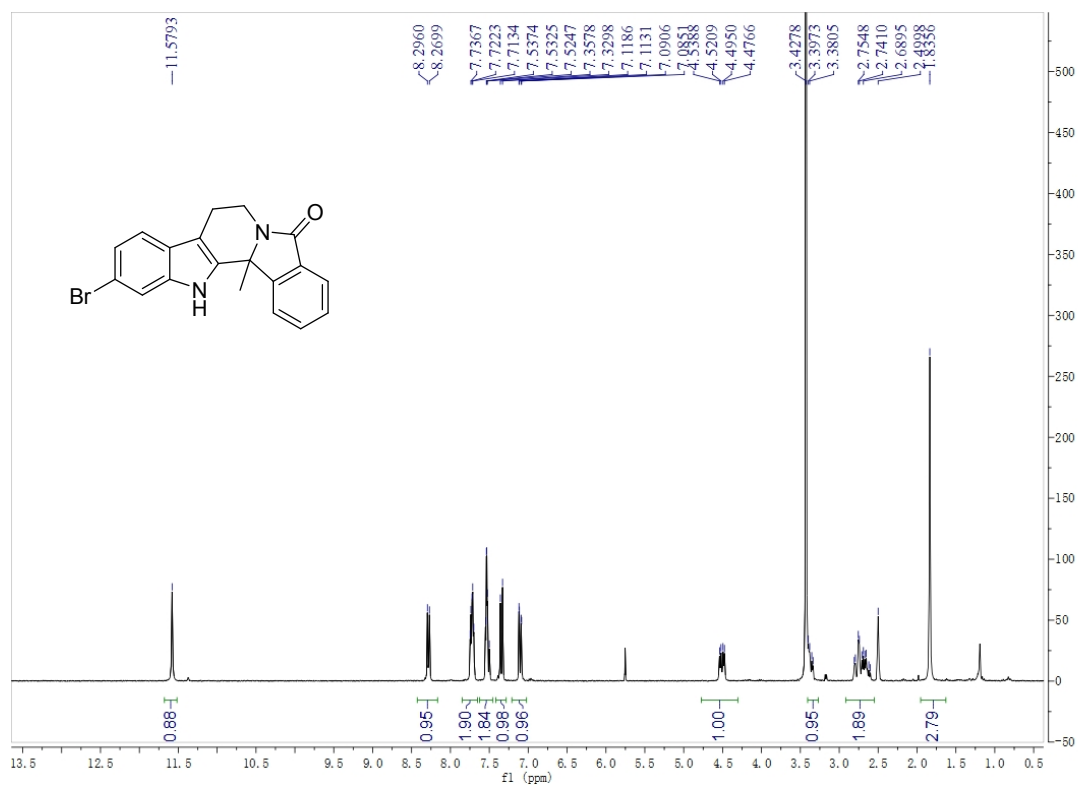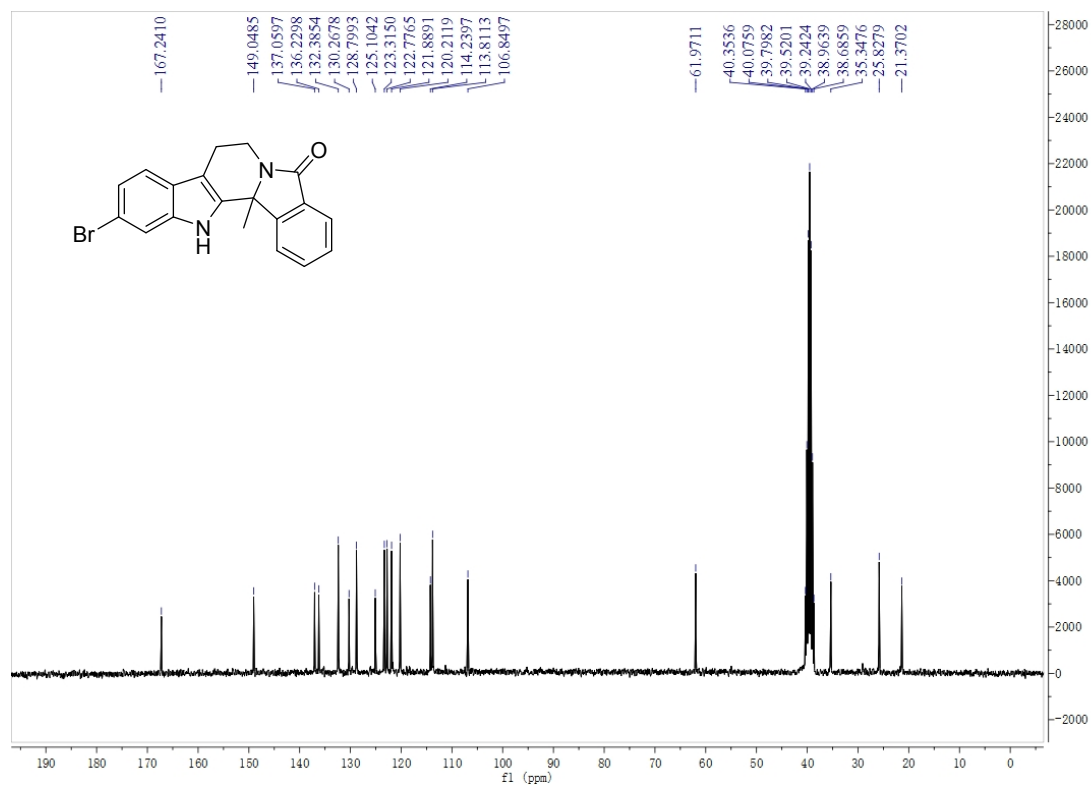

12,13b-dimethyl-7,8,13,13b-tetrahydro-5H-benzo[1,2]indolizino[8,7-b]indol-5-one (2p)

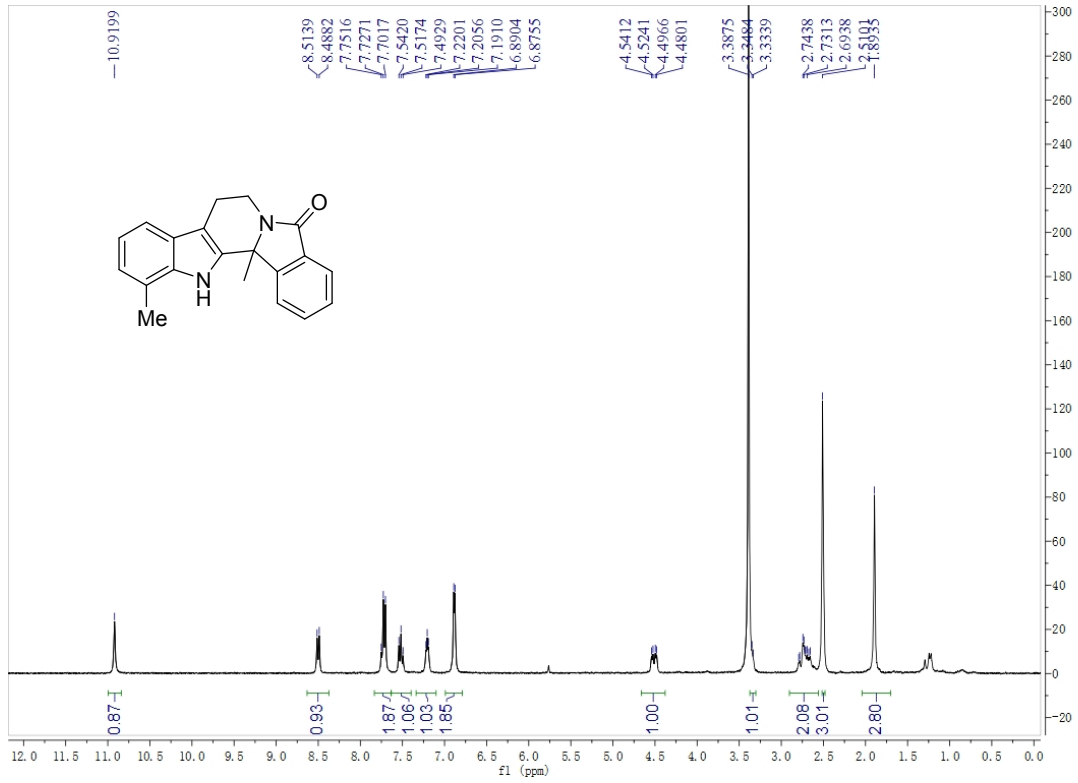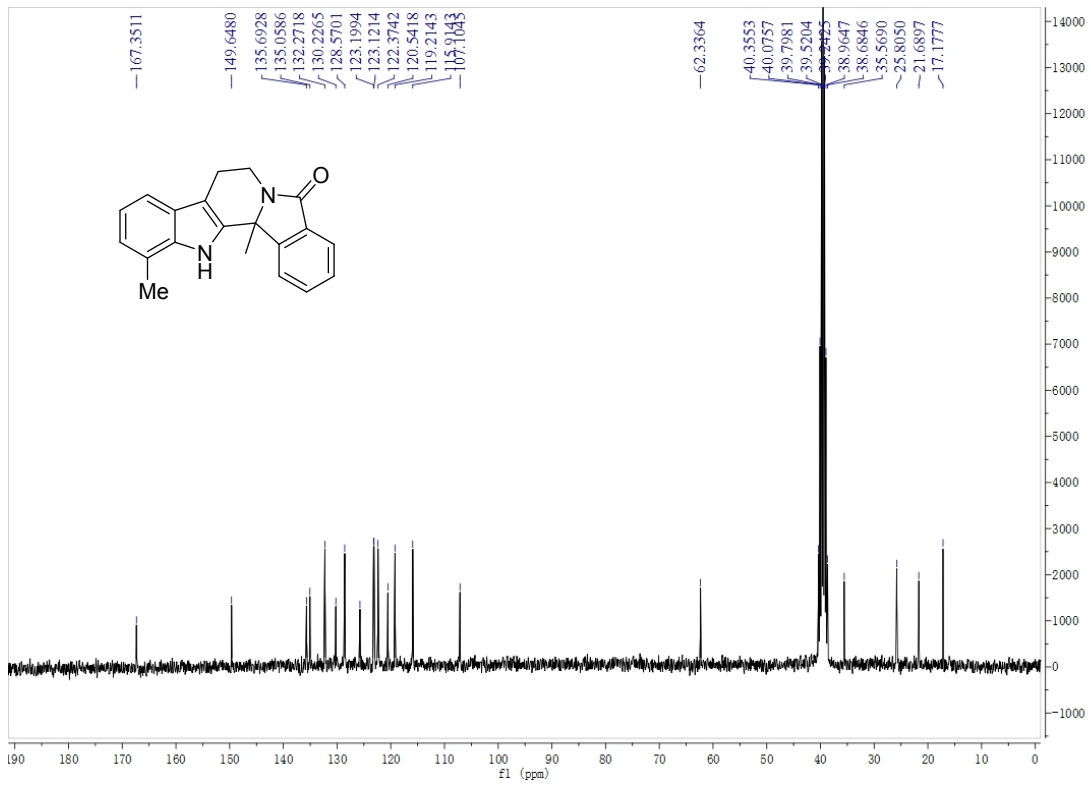



9,11,13b-trimethyl-7,8,13,13b-tetrahydro-5H-benzo[1,2]indolizino[8,7-b]indol-5-one (2q)

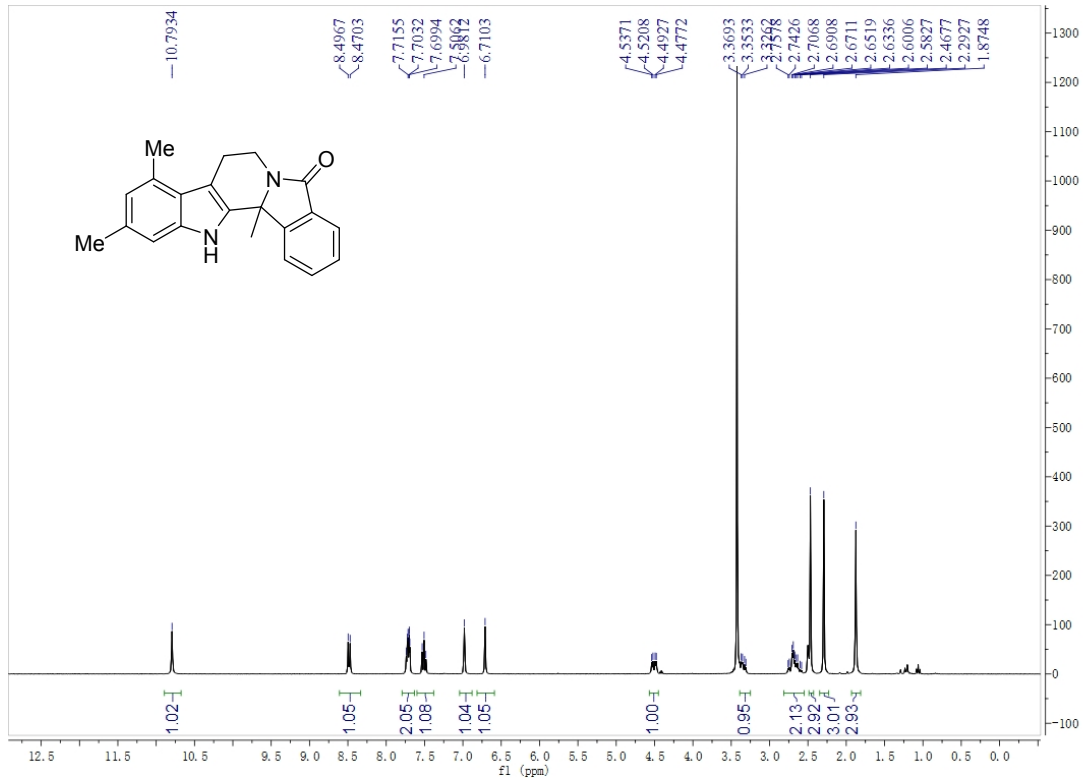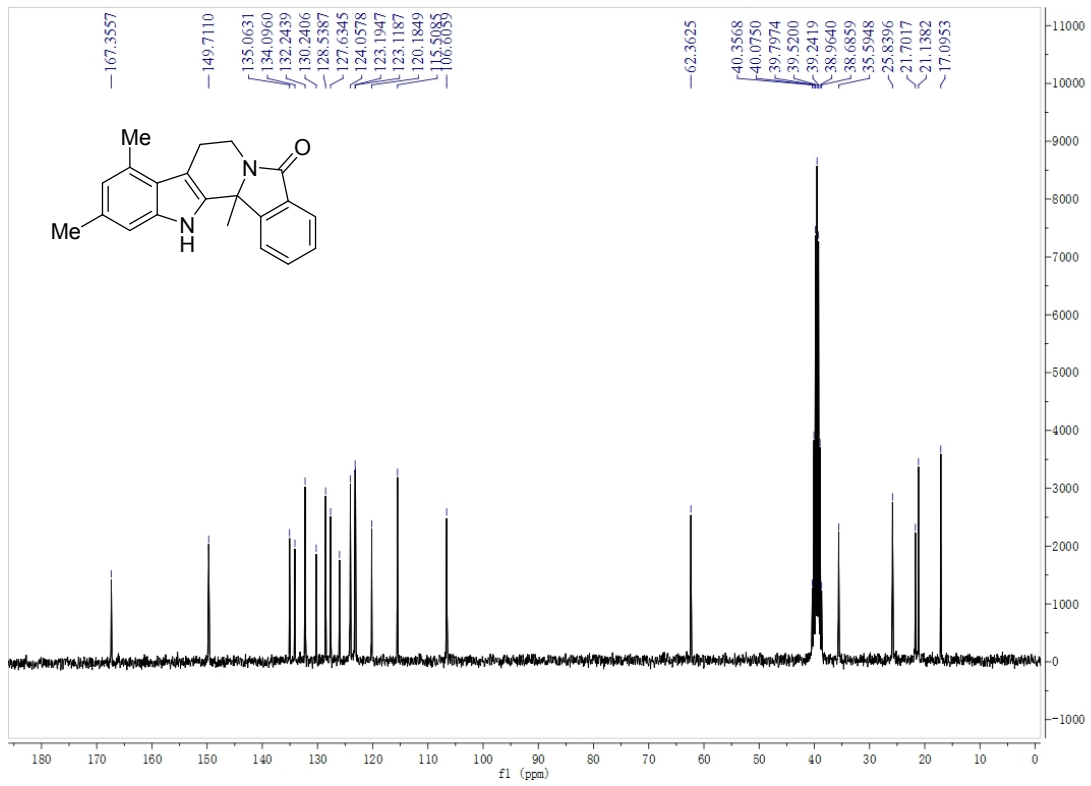

10,12,13b-trimethyl-7,8,13,13b-tetrahydro-5H-benzo[1,2]indolizino[8,7-b]indol-5-one (2r)

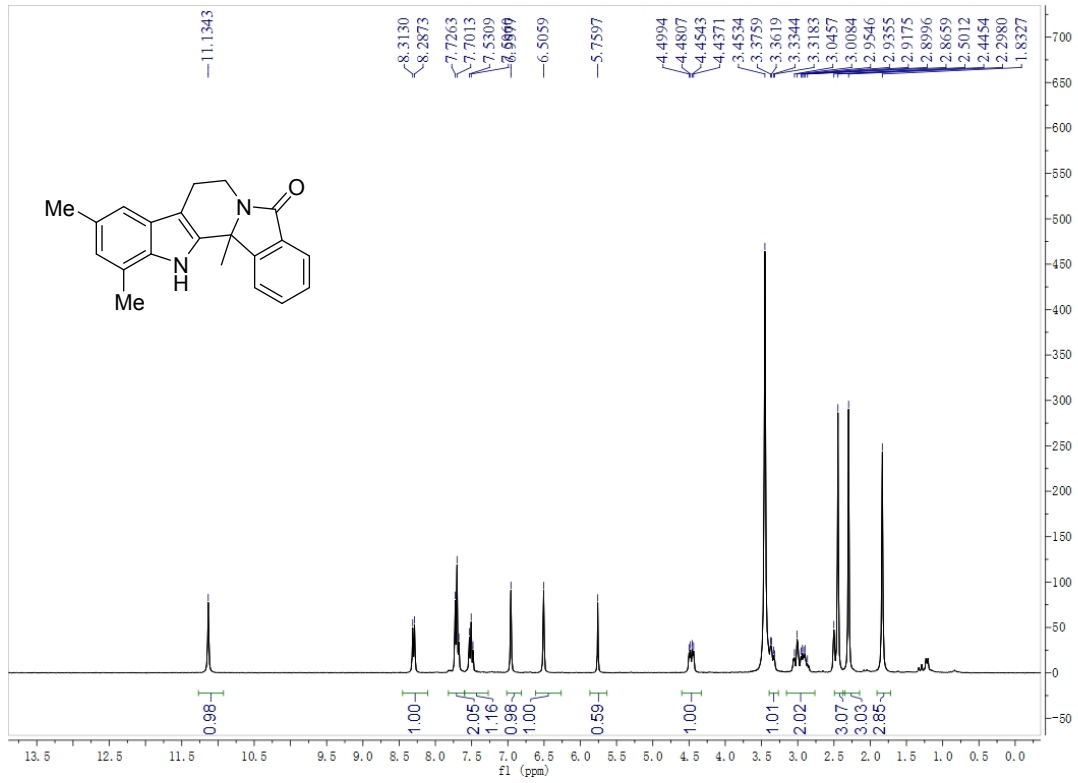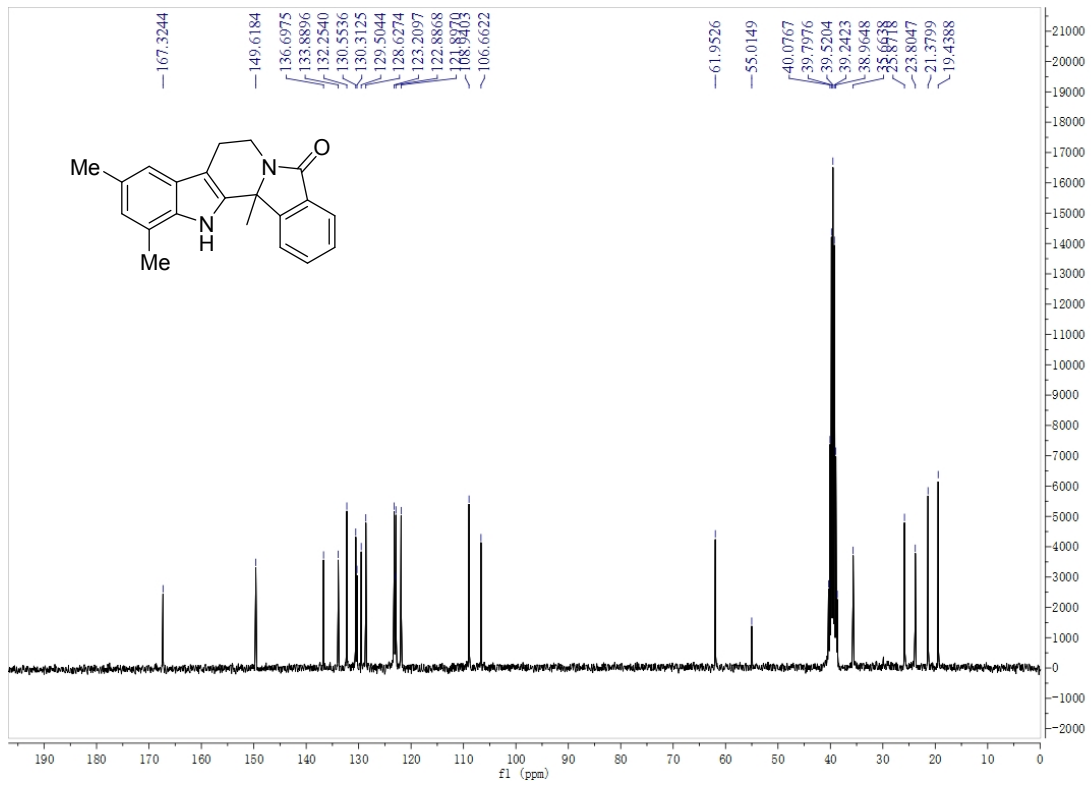

7,8,13,13b-tetrahydro-5H-benzo[1,2]indolizino[8,7-b]indol-5-one (6)

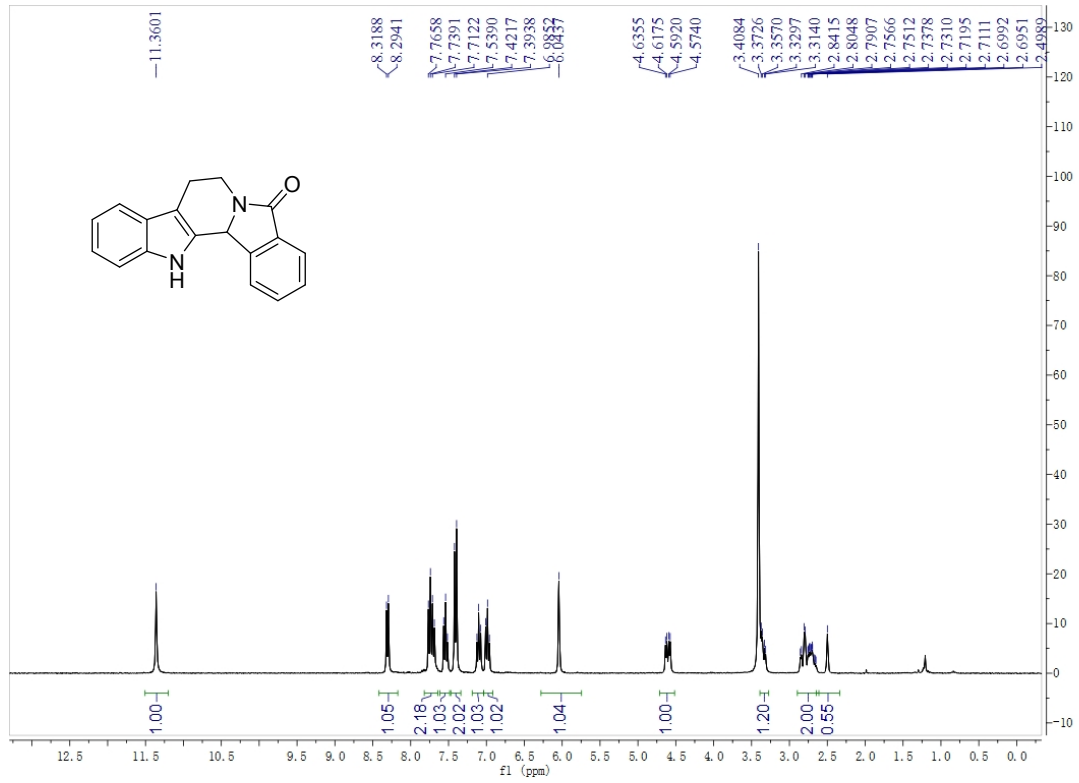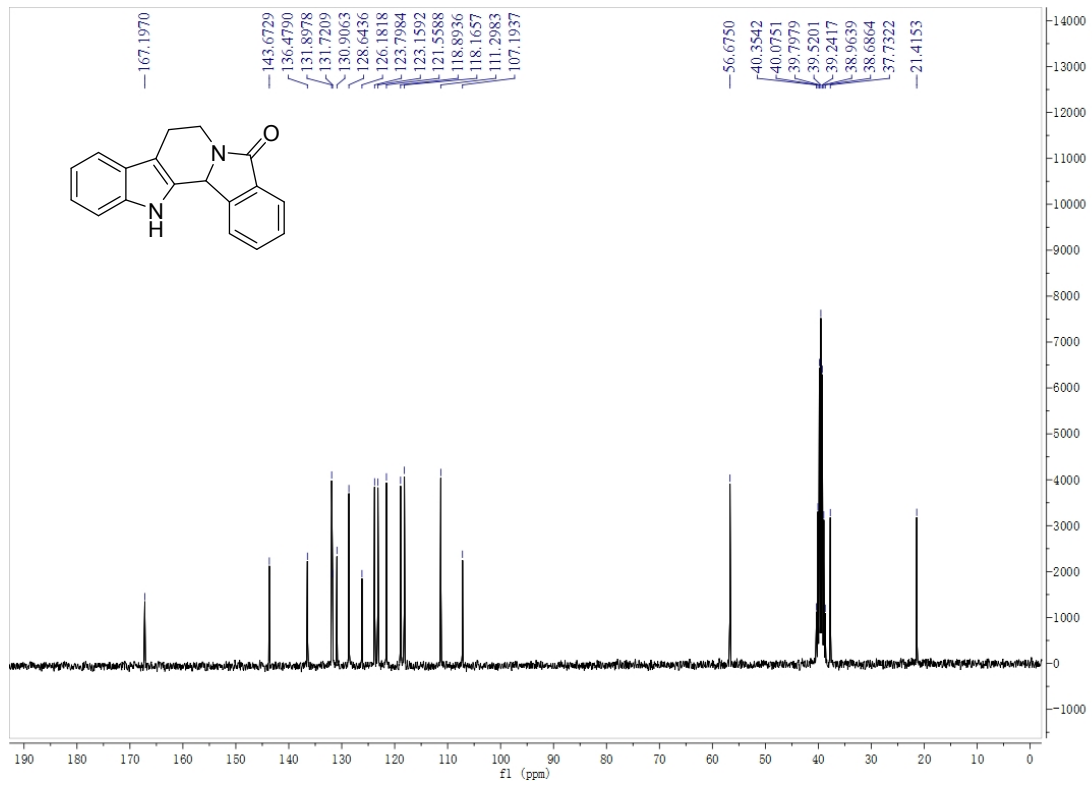

13b-methyl-7,8,13,13b-tetrahydro-5H-benzo[1,2]indolizino[8,7-b]indole (7)

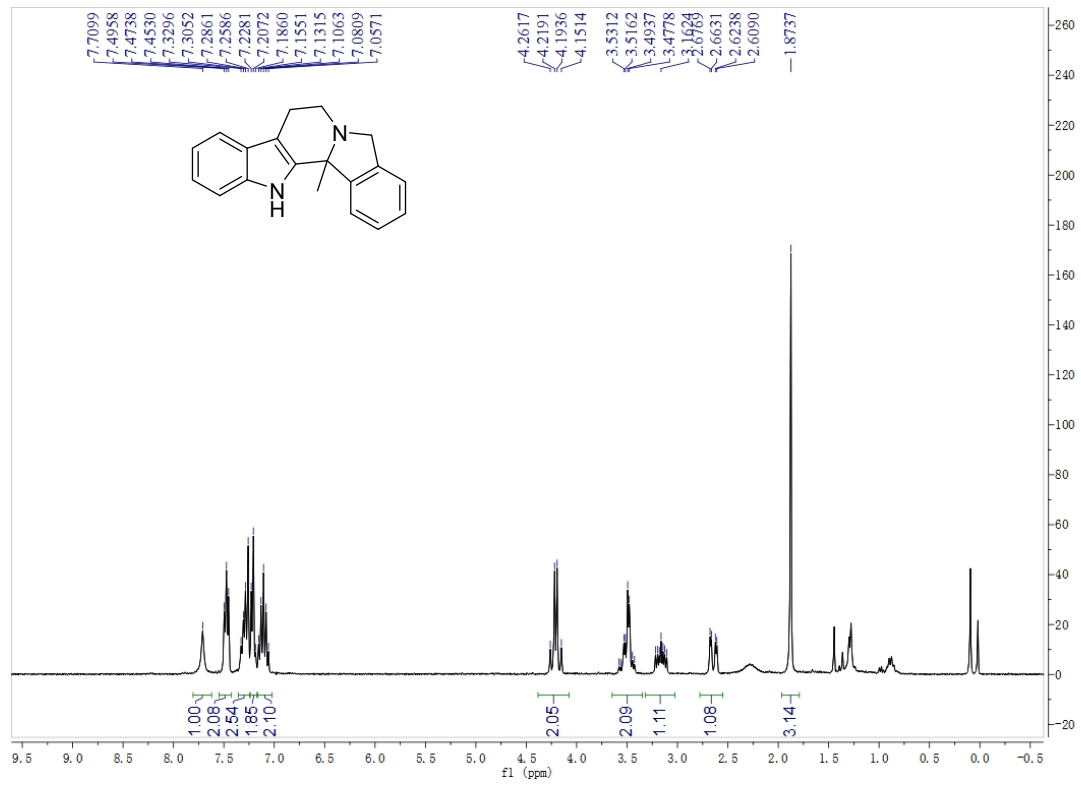

## 4. HPLC Charts of Products

### 13b-methyl-7,8,13,13b-tetrahydro-5H-benzo[1,2]indolizino[8,7-b]indol-5-one(2a)

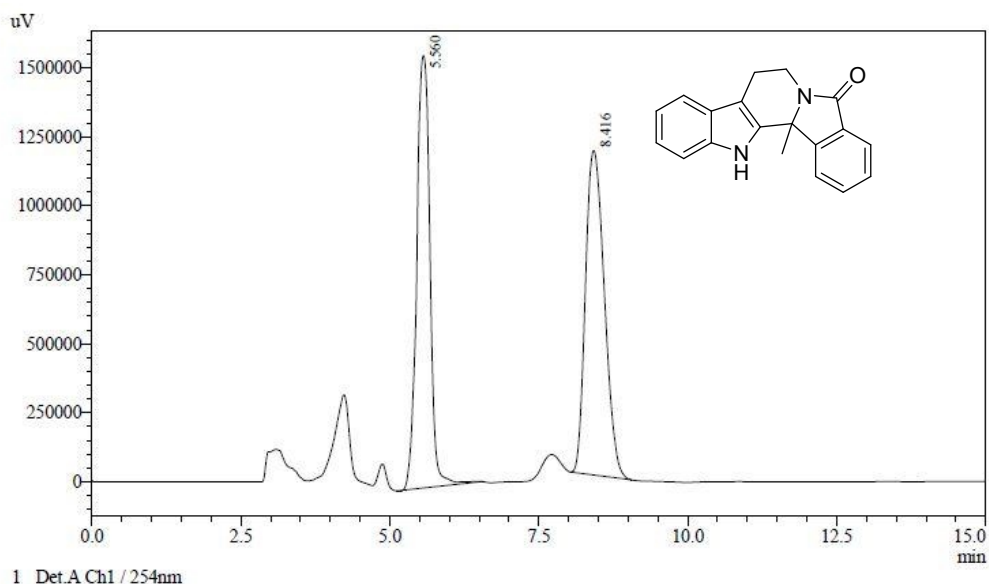

Detector A Ch1 254nm

| Peak# | Ret. Time | Area     | Height  | Area %  | Height % |
|-------|-----------|----------|---------|---------|----------|
| 1     | 5.560     | 24177498 | 1567495 | 48.196  | 57.129   |
| 2     | 8.416     | 25987262 | 1176264 | 51.804  | 42.871   |
| Total |           | 50164760 | 2743759 | 100.000 | 100.000  |

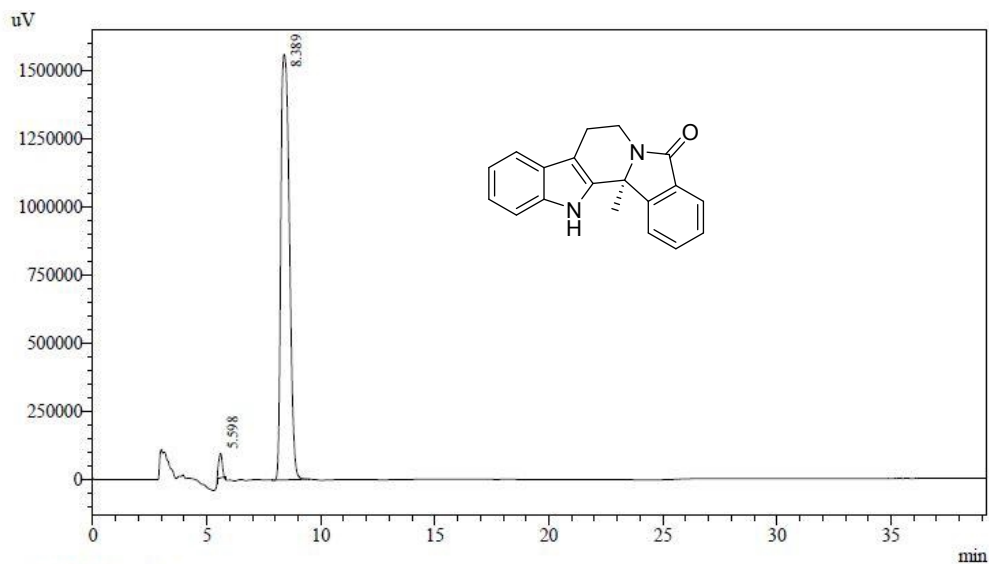

Detector A Ch1 254nm

| Peak# | Ret. Time | Area     | Height  | Area %  | Height % |
|-------|-----------|----------|---------|---------|----------|
| 1     | 5.598     | 938910   | 90502   | 2.250   | 5.478    |
| 2     | 8.389     | 40799515 | 1561669 | 97.750  | 94.522   |
| Total |           | 41738425 | 1652171 | 100.000 | 100.000  |

# 1-fluoro-13b-methyl-7,8,13,13b-tetrahydro-5H-benzo[1,2]indolizino[8,7-b]indol-5-one(2b)

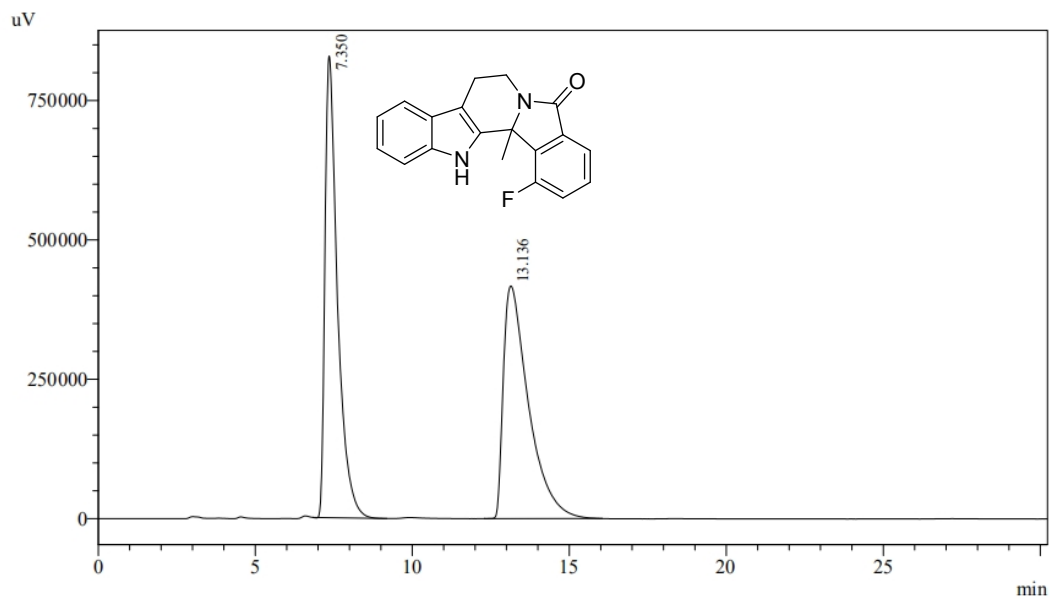

1 Det.A Ch1 / 254nm

Detector A Ch1 254nm

| Peak# | Ret. Time | Area     | Height  | Area %  | Height % |
|-------|-----------|----------|---------|---------|----------|
| 1     | 7.350     | 22916024 | 827928  | 49.627  | 66.489   |
| 2     | 13.136    | 23260381 | 417289  | 50.373  | 33.511   |
| Total |           | 46176405 | 1245217 | 100.000 | 100.000  |

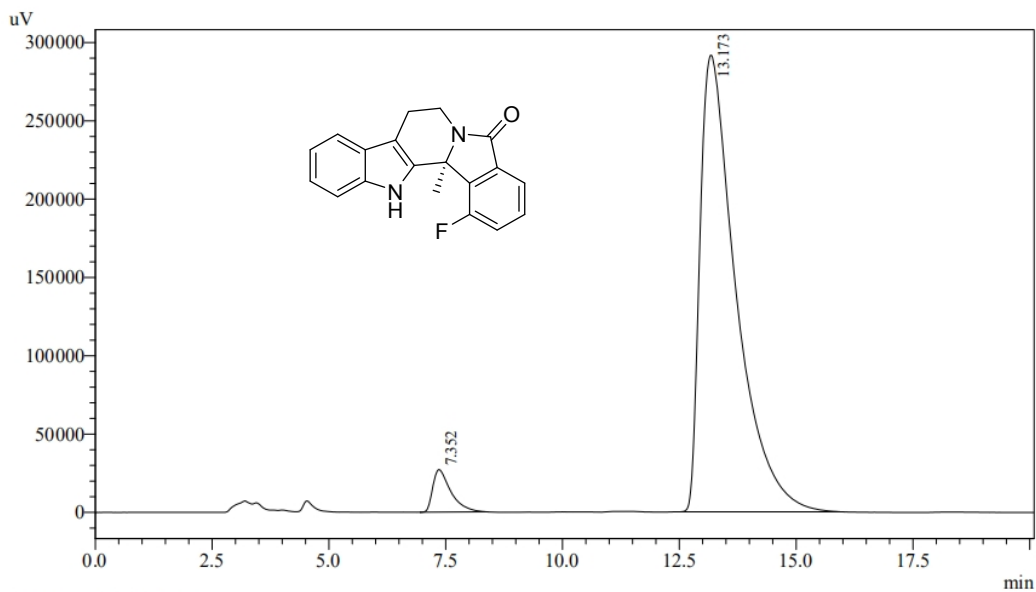

1 Det.A Ch1 / 254nm

Detector A Ch1 254nm

| Peak# | Ret. Time | Area     | Height | Area %  | Height % |
|-------|-----------|----------|--------|---------|----------|
| 1     | 7.352     | 729044   | 27168  | 4.468   | 8.523    |
| 2     | 13.173    | 15589479 | 291594 | 95.532  | 91.477   |
| Total |           | 16318523 | 318762 | 100.000 | 100.000  |

**2-fluoro-13b-methyl-7,8,13,13b-tetrahydro-5H-benzo[1,2]indolizino[8,7-b]indol-5-one (2c)**

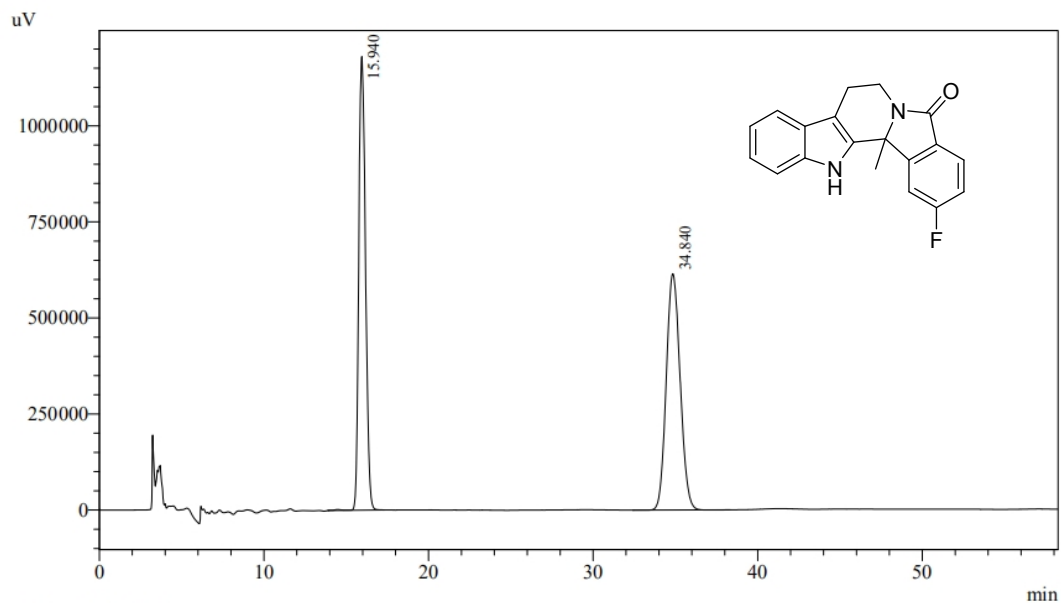

1 Det.A Ch1 / 254nm

Detector A Ch1 254nm

| Peak# | Ret. Time | Area     | Height  | Area %  | Height % |
|-------|-----------|----------|---------|---------|----------|
| 1     | 15.940    | 33633687 | 1180575 | 48.311  | 65.754   |
| 2     | 34.840    | 35985361 | 614858  | 51.689  | 34.246   |
| Total |           | 69619048 | 1795433 | 100.000 | 100.000  |

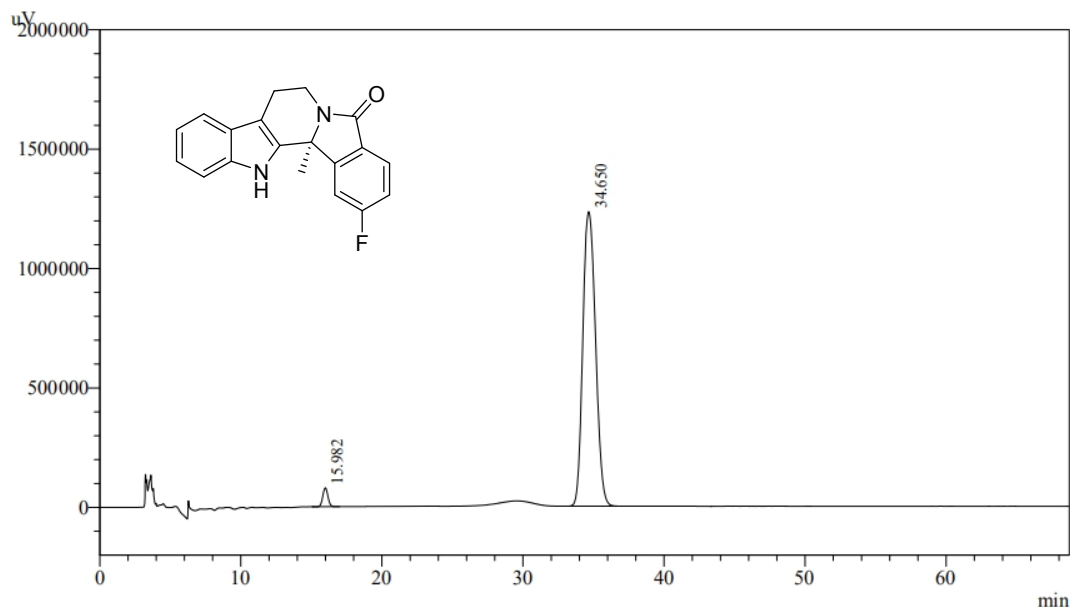

1 Det.A Ch1 / 254nm

Detector A Ch1 254nm

| Peak# | Ret. Time | Area     | Height  | Area %  | Height % |
|-------|-----------|----------|---------|---------|----------|
| 1     | 15.982    | 1988969  | 78609   | 2.507   | 5.991    |
| 2     | 34.650    | 77362903 | 1233428 | 97.493  | 94.009   |
| Total |           | 79351873 | 1312038 | 100.000 | 100.000  |

### 3-fluoro-13b-methyl-7,8,13,13b-tetrahydro-5H-benzo[1,2]indolizino[8,7-b]indol-5-one(2d)

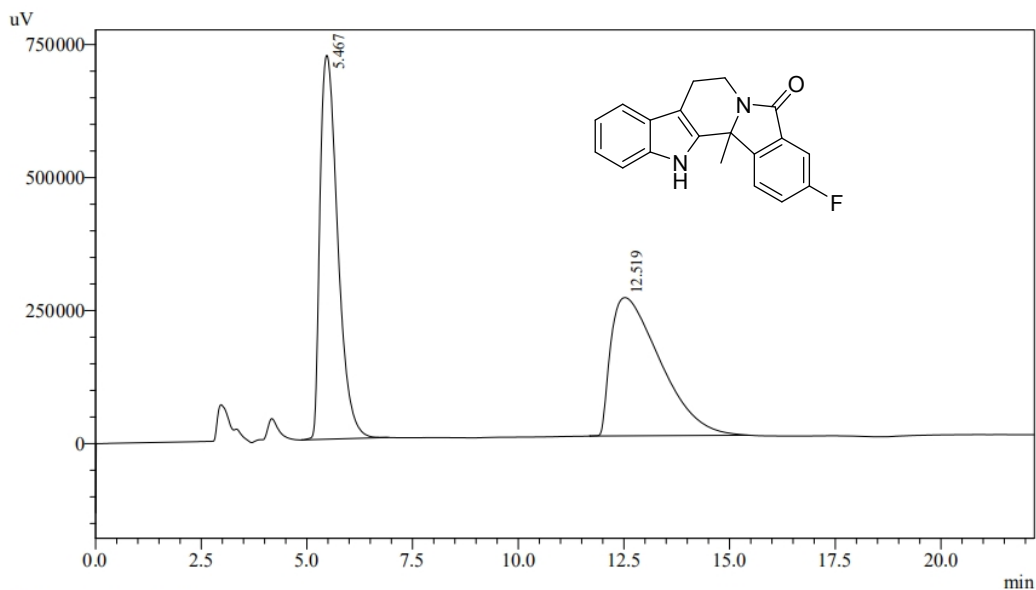

1 Det.A Ch1 / 254nm

Detector A Ch1 254nm

| Peak# | Ret. Time | Area     | Height | Area %  | Height % |
|-------|-----------|----------|--------|---------|----------|
| 1     | 5.467     | 21045868 | 721507 | 49.850  | 73.510   |
| 2     | 12.519    | 21172479 | 259997 | 50.150  | 26.490   |
| Total |           | 42218346 | 981504 | 100.000 | 100.000  |

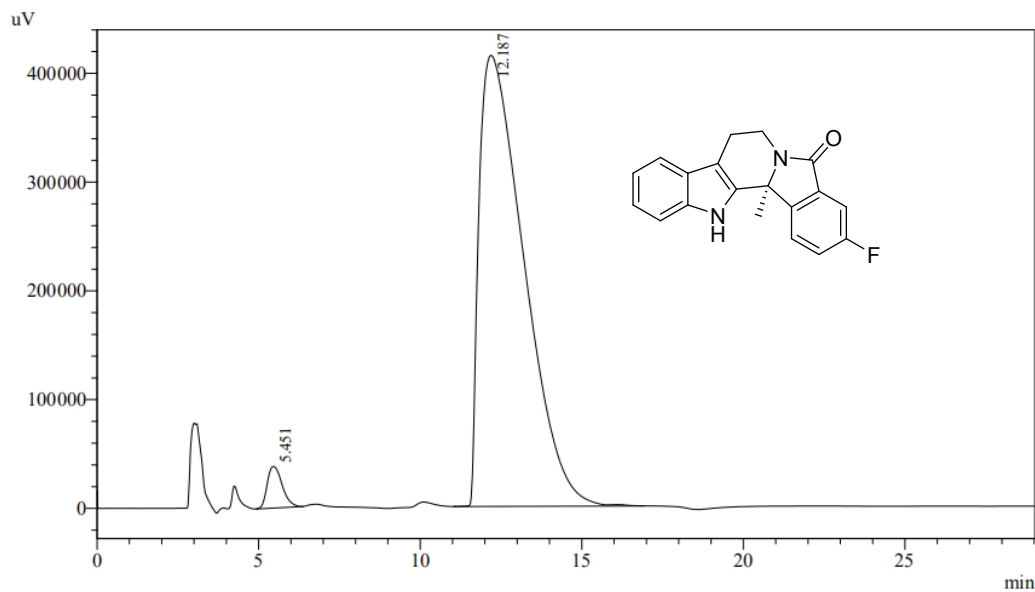

1 Det.A Ch1 / 254nm

Detector A Ch1 254nm

| Peak# | Ret. Time | Area     | Height | Area %  | Height % |
|-------|-----------|----------|--------|---------|----------|
| 1     | 5.451     | 1234517  | 38285  | 2.992   | 8.450    |
| 2     | 12.187    | 40032593 | 414774 | 97.008  | 91.550   |
| Total |           | 41267110 | 453059 | 100.000 | 100.000  |



### 3-chloro-13b-methyl-7,8,13,13b-tetrahydro-5H-benzo[1,2]indolizino[8,7-b]indol-5-one (2e)

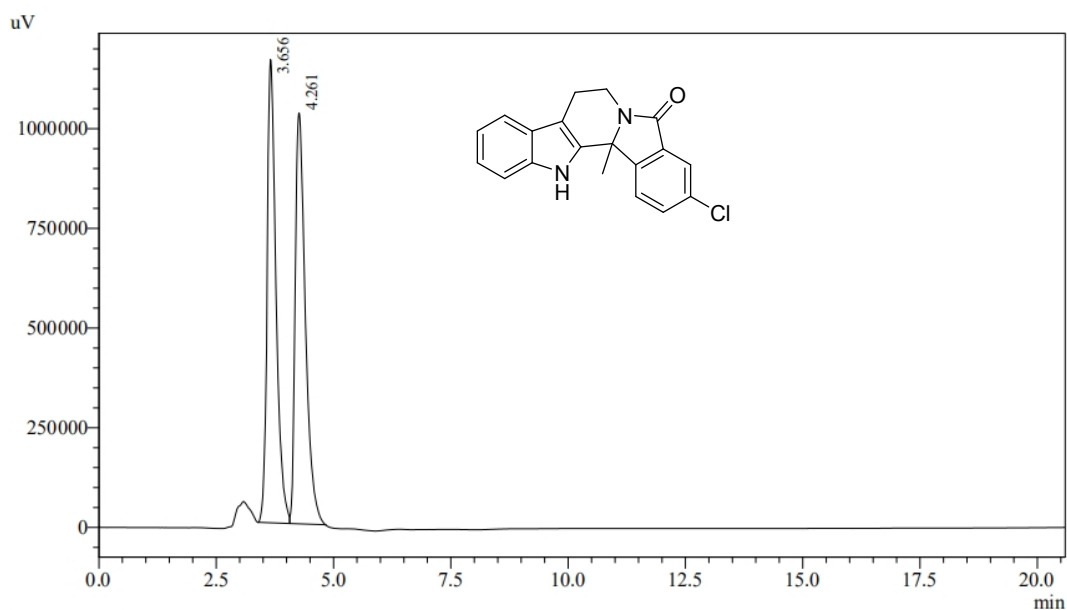

1 Det.A Ch1 / 254nm

Detector A Ch1 254nm

| Peak# | Ret. Time | Area     | Height  | Area %  | Height % |
|-------|-----------|----------|---------|---------|----------|
| 1     | 3.656     | 15262614 | 1161467 | 49.602  | 52.994   |
| 2     | 4.261     | 15507835 | 1030210 | 50.398  | 47.006   |
| Total |           | 30770449 | 2191678 | 100.000 | 100.000  |

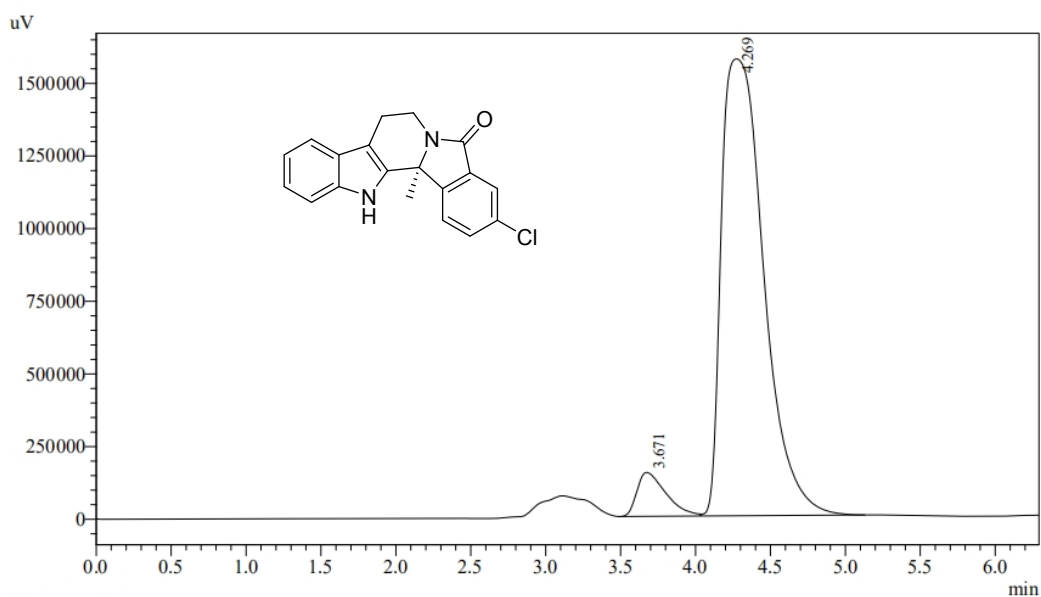

1 Det.A Ch1 / 254nm

Detector A Ch1 254nm

| Peak# | Ret. Time | Area     | Height  | Area %  | Height % |
|-------|-----------|----------|---------|---------|----------|
| 1     | 3.671     | 2029183  | 151822  | 6.156   | 8.806    |
| 2     | 4.269     | 30935971 | 1572304 | 93.844  | 91.194   |
| Total |           | 32965154 | 1724126 | 100.000 | 100.000  |

### 3-bromo-13b-methyl-7,8,13,13b-tetrahydro-5H-benzo[1,2]indolizino[8,7-b]indol-5-one (2f)

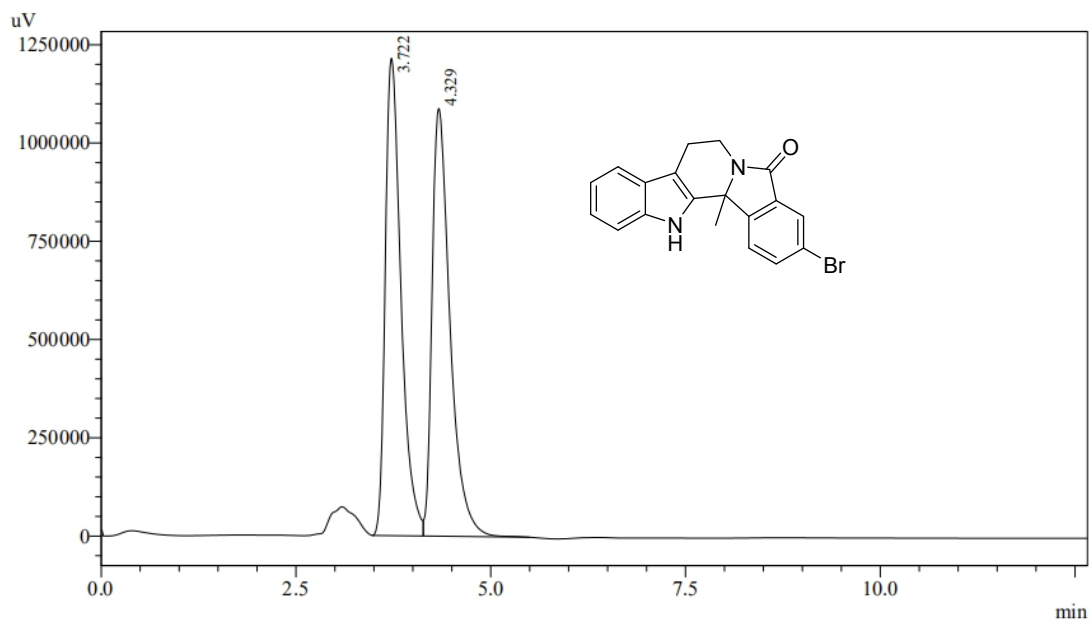

1 Det.A Ch1 / 254nm

Detector A Ch1 254nm

| Peak# | Ret. Time | Area     | Height  | Area %  | Height % |
|-------|-----------|----------|---------|---------|----------|
| 1     | 3.722     | 17037373 | 1214233 | 49.346  | 52.737   |
| 2     | 4.329     | 17488900 | 1088205 | 50.654  | 47.263   |
| Total |           | 34526273 | 2302438 | 100.000 | 100.000  |

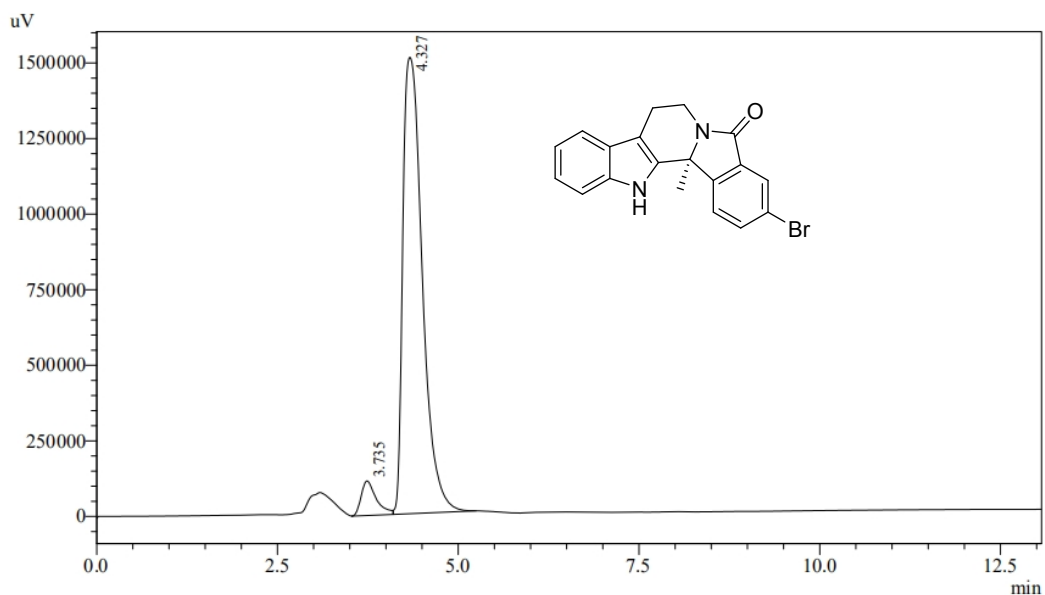

1 Det.A Ch1 / 254nm

Detector A Ch1 254nm

| Peak# | Ret. Time | Area     | Height  | Area %  | Height % |
|-------|-----------|----------|---------|---------|----------|
| 1     | 3.735     | 1661870  | 114350  | 5.555   | 7.041    |
| 2     | 4.327     | 28257338 | 1509772 | 94.445  | 92.959   |
| Total |           | 29919208 | 1624123 | 100.000 | 100.000  |

### 3,13b-dimethyl-7,8,13,13b-tetrahydro-5H-benzo[1,2]indolizino[8,7-b]indol-5-one (2g)

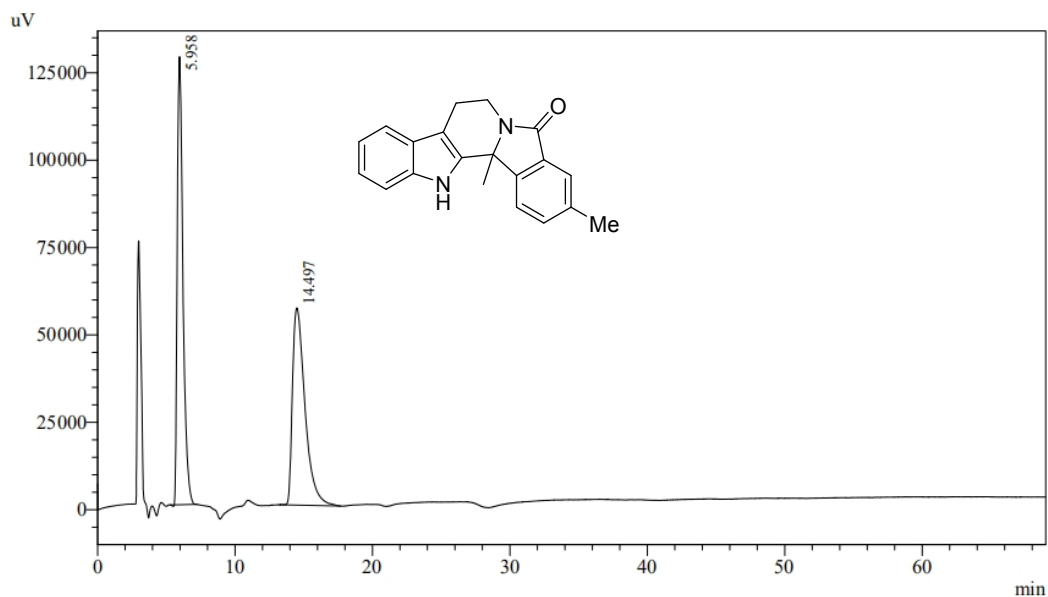

1 Det.A Ch1 / 254nm

Detector A Ch1 254nm

| Peak# | Ret. Time | Area    | Height | Area %  | Height % |
|-------|-----------|---------|--------|---------|----------|
| 1     | 5.958     | 3714553 | 128161 | 50.940  | 69.438   |
| 2     | 14.497    | 3577487 | 56408  | 49.060  | 30.562   |
| Total |           | 7292040 | 184569 | 100.000 | 100.000  |

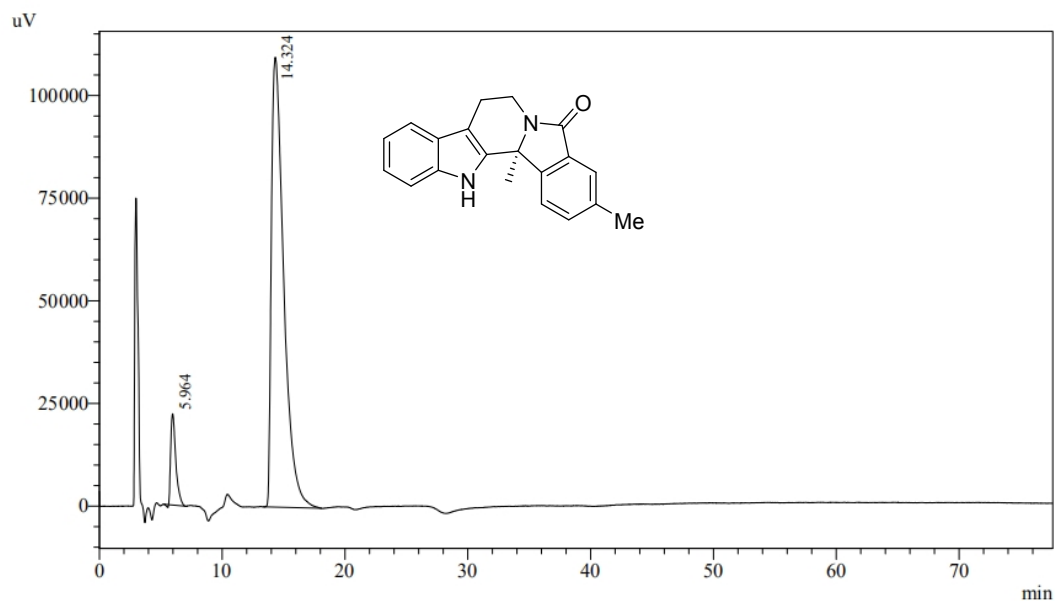

1 Det.A Ch1 / 254nm

Detector A Ch1 254nm

| Peak# | Ret. Time | Area    | Height | Area %  | Height % |
|-------|-----------|---------|--------|---------|----------|
| 1     | 5.964     | 635134  | 22213  | 7.673   | 16.858   |
| 2     | 14.324    | 7641933 | 109551 | 92.327  | 83.142   |
| Total |           | 8277067 | 131764 | 100.000 | 100.000  |

### 13b-benzyl-7,8,13,13b-tetrahydro-5H-benzo[1,2]indolizino[8,7-b]indol-5-one(2h)

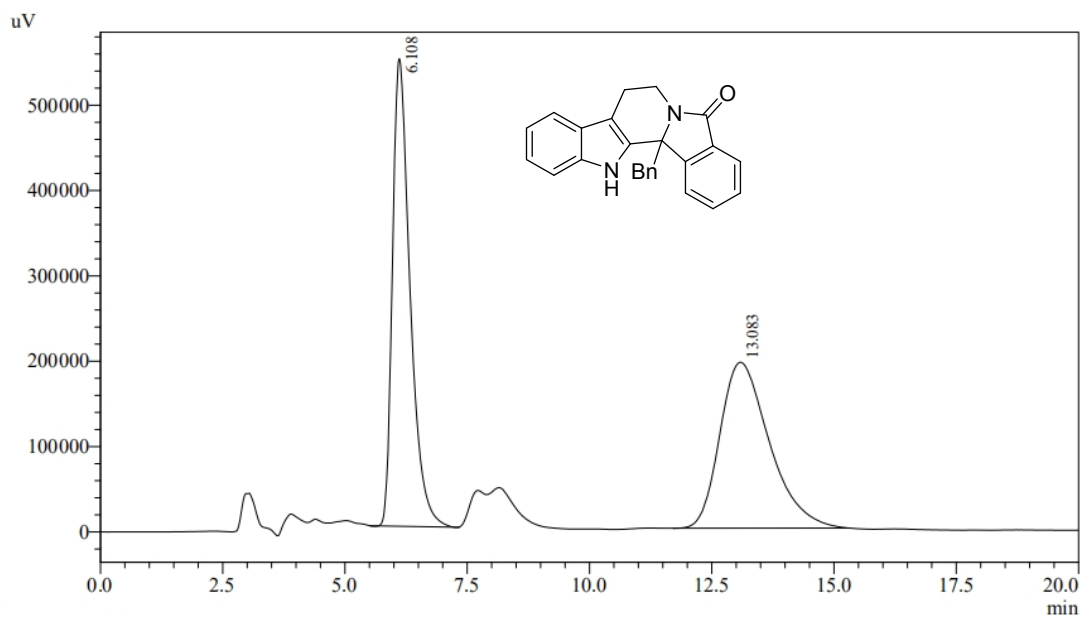

1 Det.A Ch1 / 254nm

Detector A Ch1 254nm

| Peak# | Ret. Time | Area     | Height | Area %  | Height % |
|-------|-----------|----------|--------|---------|----------|
| 1     | 6.108     | 13739640 | 547690 | 50.096  | 73.804   |
| 2     | 13.083    | 13686950 | 194398 | 49.904  | 26.196   |
| Total |           | 27426590 | 742087 | 100.000 | 100.000  |

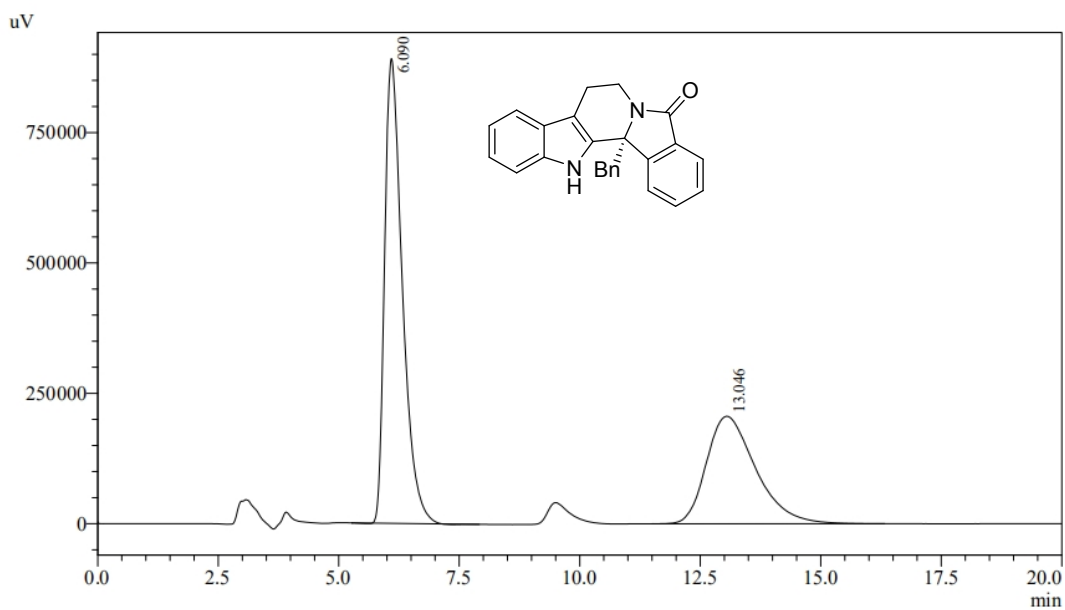

1 Det.A Ch1 / 254nm

Detector A Ch1 254nm

| Peak# | Ret. Time | Area     | Height  | Area %  | Height % |
|-------|-----------|----------|---------|---------|----------|
| 1     | 6.090     | 22837167 | 890935  | 60.924  | 81.214   |
| 2     | 13.046    | 14647497 | 206083  | 39.076  | 18.786   |
| Total |           | 37484664 | 1097018 | 100.000 | 100.000  |

## 9-fluoro-13b-methyl-7,8,13,13b-tetrahydro-5H-benzo[1,2]indolizino[8,7-b]indol-5-one (2i)

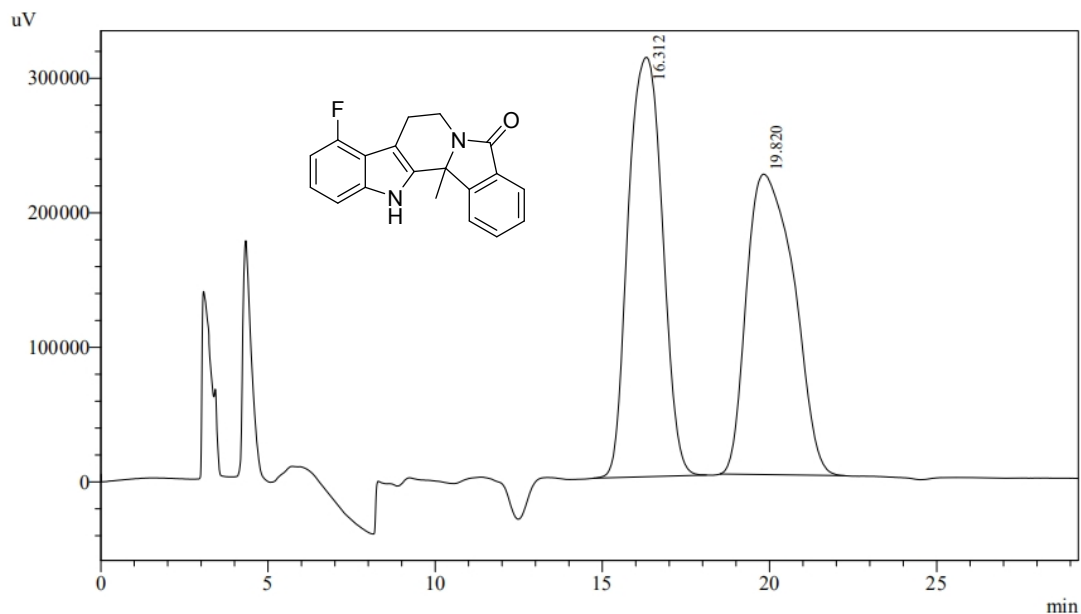

1 Det.A Ch1 / 254nm

Detector A Ch1 254nm

| Peak# | Ret. Time | Area     | Height | Area %  | Height % |
|-------|-----------|----------|--------|---------|----------|
| 1     | 16.312    | 22279461 | 311806 | 50.320  | 58.266   |
| 2     | 19.820    | 21995757 | 223339 | 49.680  | 41.734   |
| Total |           | 44275218 | 535145 | 100.000 | 100.000  |

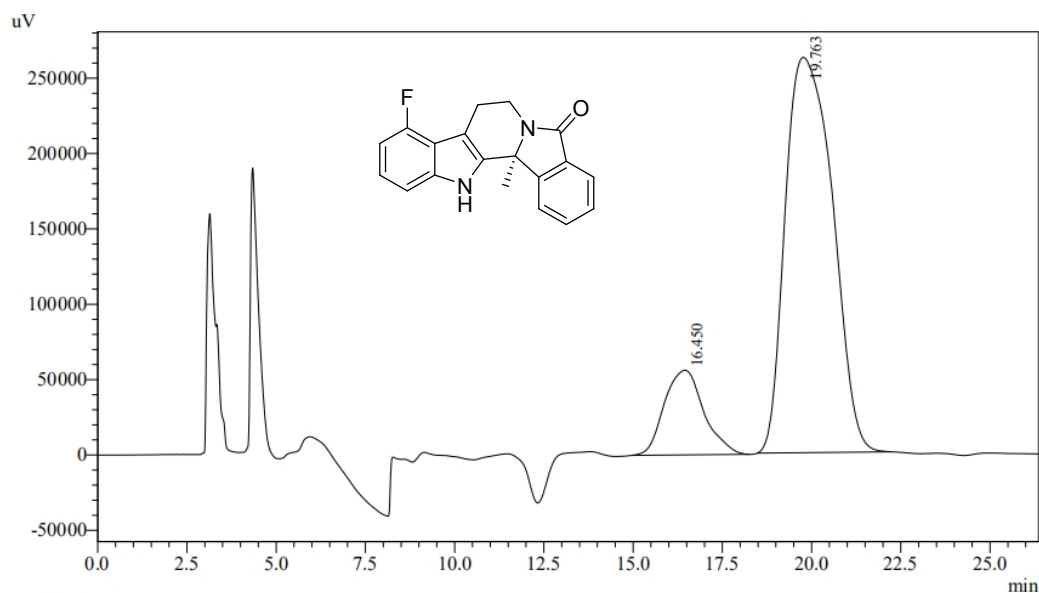

1 Det.A Ch1 / 254nm

Detector A Ch1 254nm

| Peak# | Ret. Time | Area     | Height | Area %  | Height % |
|-------|-----------|----------|--------|---------|----------|
| 1     | 16.450    | 4323618  | 56199  | 15.136  | 17.647   |
| 2     | 19.763    | 24242273 | 262265 | 84.864  | 82.353   |
| Total |           | 28565891 | 318465 | 100.000 | 100.000  |

**10-bromo-13b-methyl-7,8,13,13b-tetrahydro-5H-benzo[1,2]indolizino[8,7-b]indol-5-one (2j)**

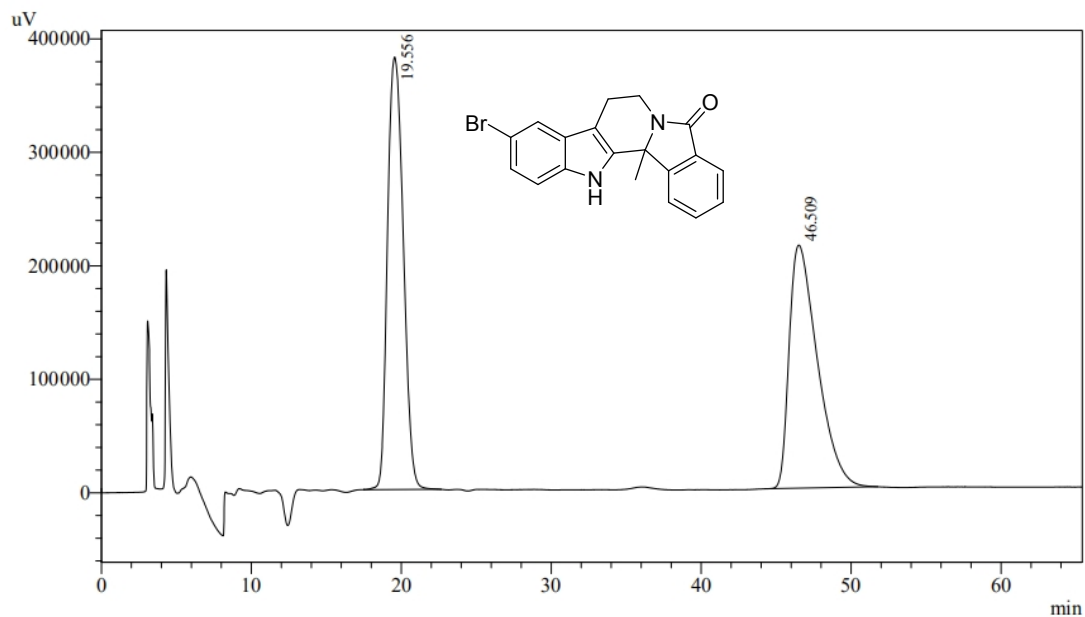

1 Det.A Ch1 / 254nm

Detector A Ch1 254nm

| Peak# | Ret. Time | Area     | Height | Area %  | Height % |
|-------|-----------|----------|--------|---------|----------|
| 1     | 19.556    | 27880669 | 381065 | 49.923  | 64.019   |
| 2     | 46.509    | 27966263 | 214175 | 50.077  | 35.981   |
| Total |           | 55846931 | 595240 | 100.000 | 100.000  |

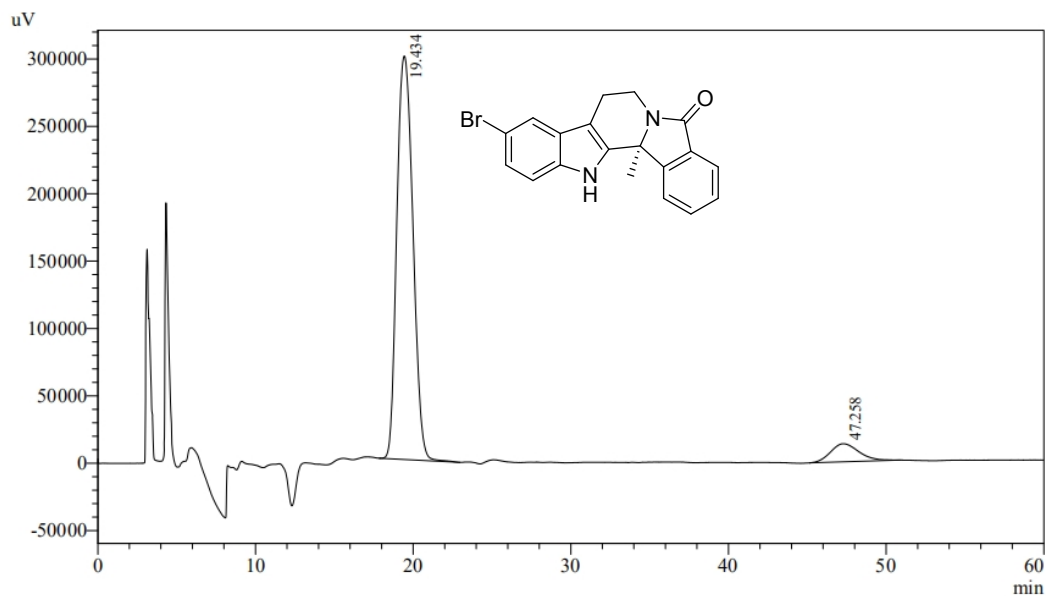

1 Det.A Ch1 / 254nm

Detector A Ch1 254nm

| Peak# | Ret. Time | Area     | Height | Area %  | Height % |
|-------|-----------|----------|--------|---------|----------|
| 1     | 19.434    | 21266836 | 299474 | 92.660  | 95.707   |
| 2     | 47.258    | 1684549  | 13433  | 7.340   | 4.293    |
| Total |           | 22951384 | 312907 | 100.000 | 100.000  |

# 10-methoxy-13b-methyl-7,8,13,13b-tetrahydro-5H-benzo[1,2]indolizino[8,7-b]indol-5-one (2k)

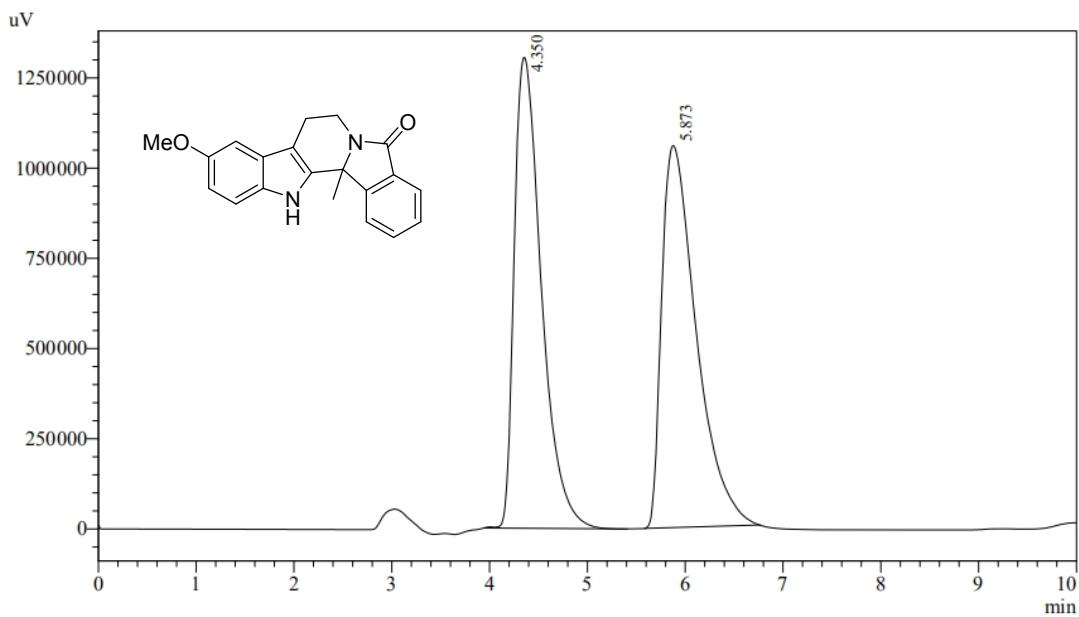

1 Det.A Ch1 / 254nm

Detector A Ch1 254nm

| Peak# | Ret. Time | Area     | Height  | Area %  | Height % |
|-------|-----------|----------|---------|---------|----------|
| 1     | 4.350     | 25218273 | 1304677 | 49.219  | 55.206   |
| 2     | 5.873     | 26018815 | 1058607 | 50.781  | 44.794   |
| Total |           | 51237089 | 2363285 | 100.000 | 100.000  |

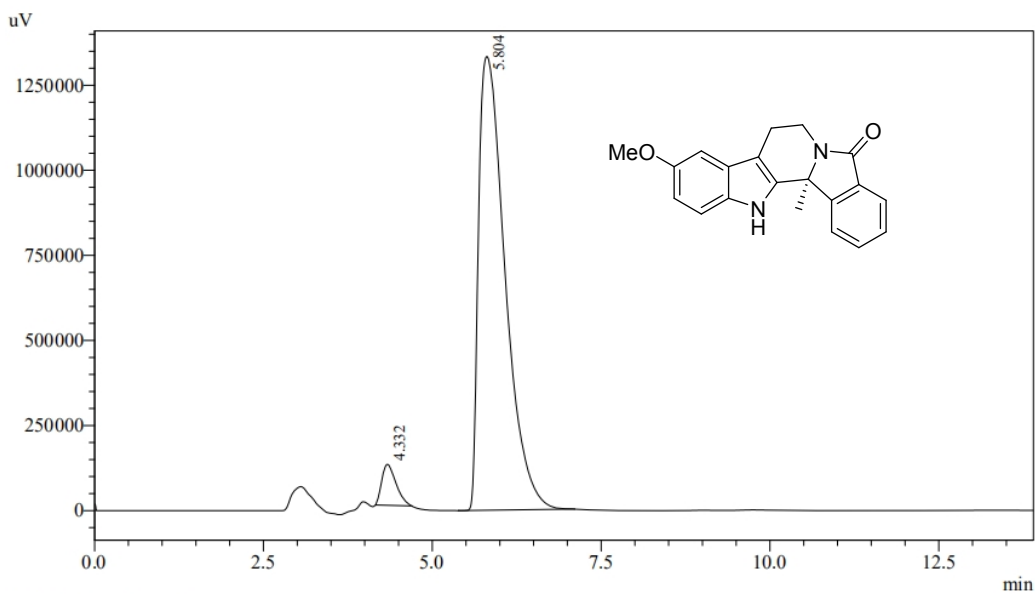

1 Det.A Ch1 / 254nm

Detector A Ch1 254nm

| Peak# | Ret. Time | Area     | Height  | Area %  | Height % |
|-------|-----------|----------|---------|---------|----------|
| 1     | 4.332     | 1768864  | 120356  | 4.633   | 8.278    |
| 2     | 5.804     | 36410165 | 1333524 | 95.367  | 91.722   |
| Total |           | 38179028 | 1453880 | 100.000 | 100.000  |

**10-(benzyloxy)-13b-methyl-7,8,13,13b-tetrahydro-5H-benzo[1,2]indolizino[8,7-b]indol-5-one**  
**(21)**

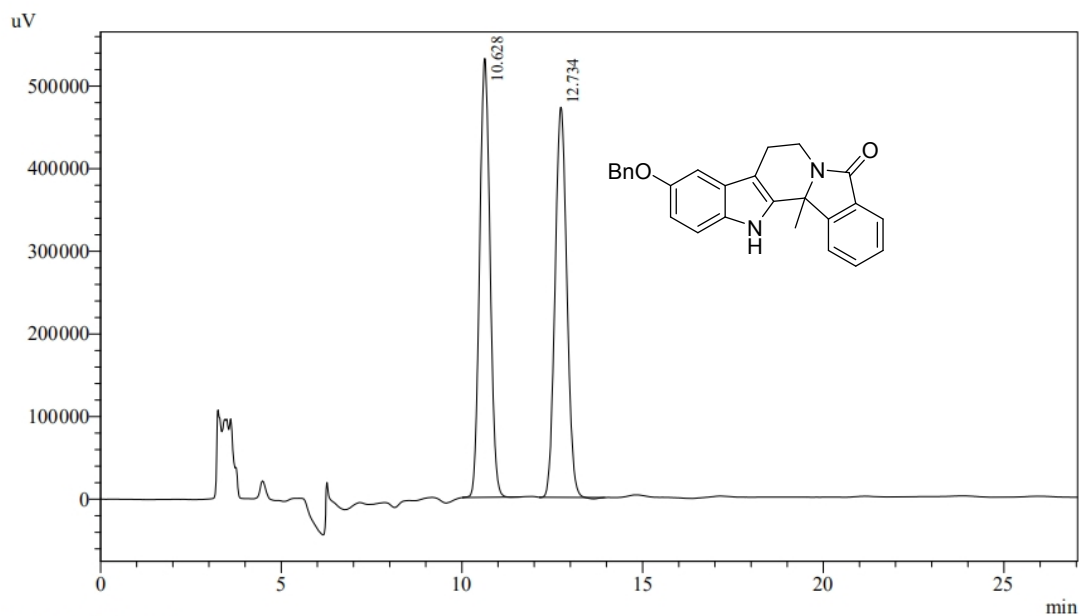

1 Det.A Ch1 / 254nm

Detector A Ch1 254nm

| Peak# | Ret. Time | Area     | Height  | Area %  | Height % |
|-------|-----------|----------|---------|---------|----------|
| 1     | 10.628    | 10645033 | 531059  | 49.906  | 52.936   |
| 2     | 12.734    | 10685110 | 472146  | 50.094  | 47.064   |
| Total |           | 21330143 | 1003205 | 100.000 | 100.000  |

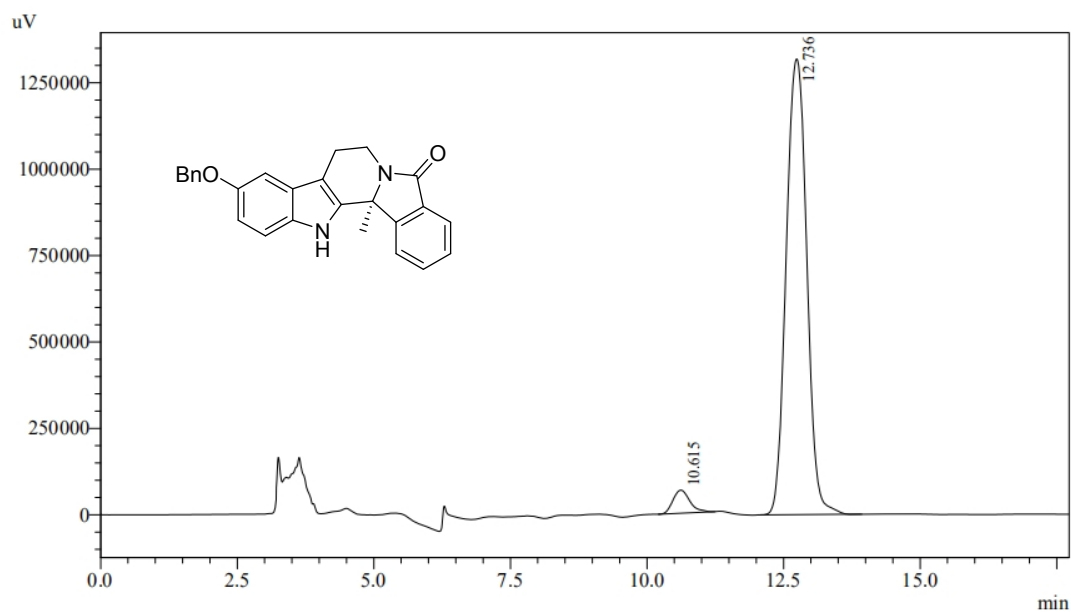

1 Det.A Ch1 / 254nm

Detector A Ch1 254nm

| Peak# | Ret. Time | Area     | Height  | Area %  | Height % |
|-------|-----------|----------|---------|---------|----------|
| 1     | 10.615    | 1424633  | 66512   | 3.960   | 4.803    |
| 2     | 12.736    | 34549242 | 1318399 | 96.040  | 95.197   |
| Total |           | 35973875 | 1384911 | 100.000 | 100.000  |



# 10-ethyl-13b-methyl-7,8,13,13b-tetrahydro-5H-benzo[1,2]indolizino[8,7-b]indol-5-one (2m)

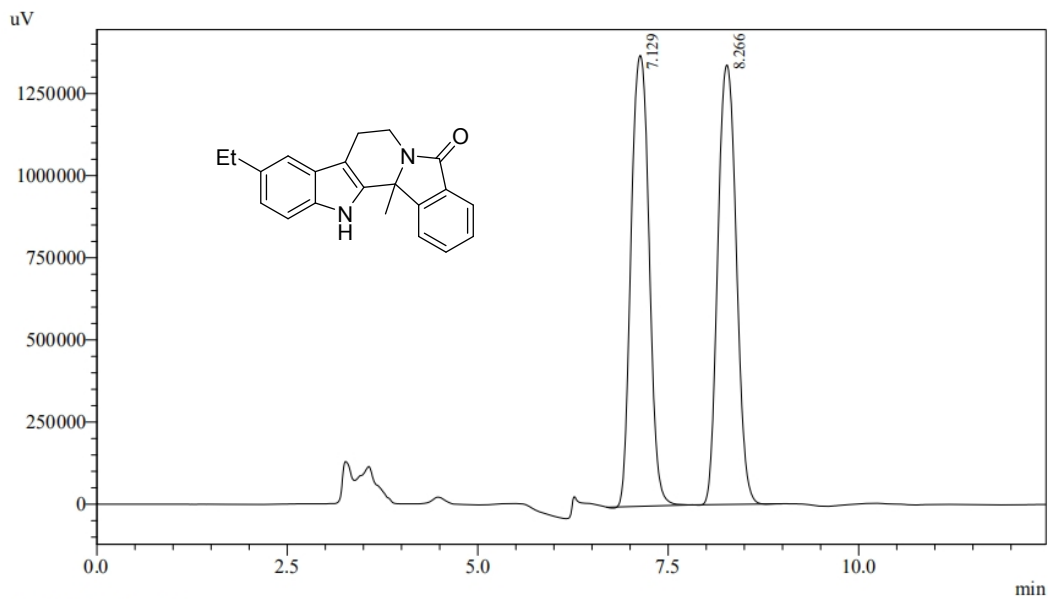

1 Det.A Ch1 / 254nm

Detector A Ch1 254nm

| Peak# | Ret. Time | Area     | Height  | Area %  | Height % |
|-------|-----------|----------|---------|---------|----------|
| 1     | 7.129     | 22615825 | 1372387 | 50.015  | 50.641   |
| 2     | 8.266     | 22602084 | 1337632 | 49.985  | 49.359   |
| Total |           | 45217908 | 2710018 | 100.000 | 100.000  |

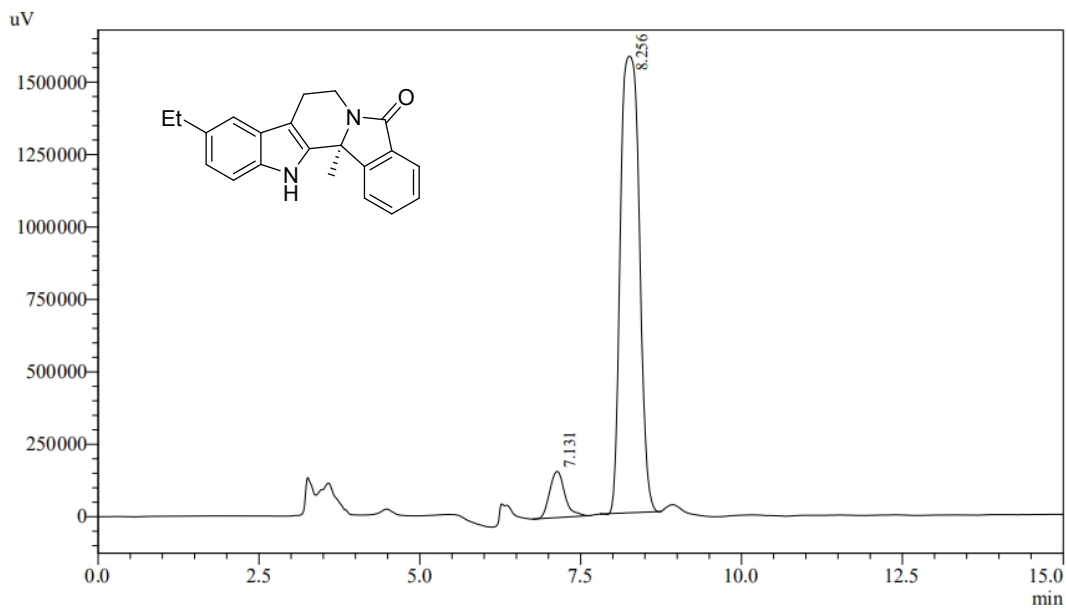

1 Det.A Ch1 / 254nm

Detector A Ch1 254nm

| Peak# | Ret. Time | Area     | Height  | Area %  | Height % |
|-------|-----------|----------|---------|---------|----------|
| 1     | 7.131     | 2613615  | 159935  | 7.515   | 9.216    |
| 2     | 8.256     | 32164733 | 1575407 | 92.485  | 90.784   |
| Total |           | 34778348 | 1735342 | 100.000 | 100.000  |

# 10-isopropyl-13b-methyl-7,8,13,13b-tetrahydro-5H-benzo[1,2]indolizino[8,7-b]indol-5-one (2n)

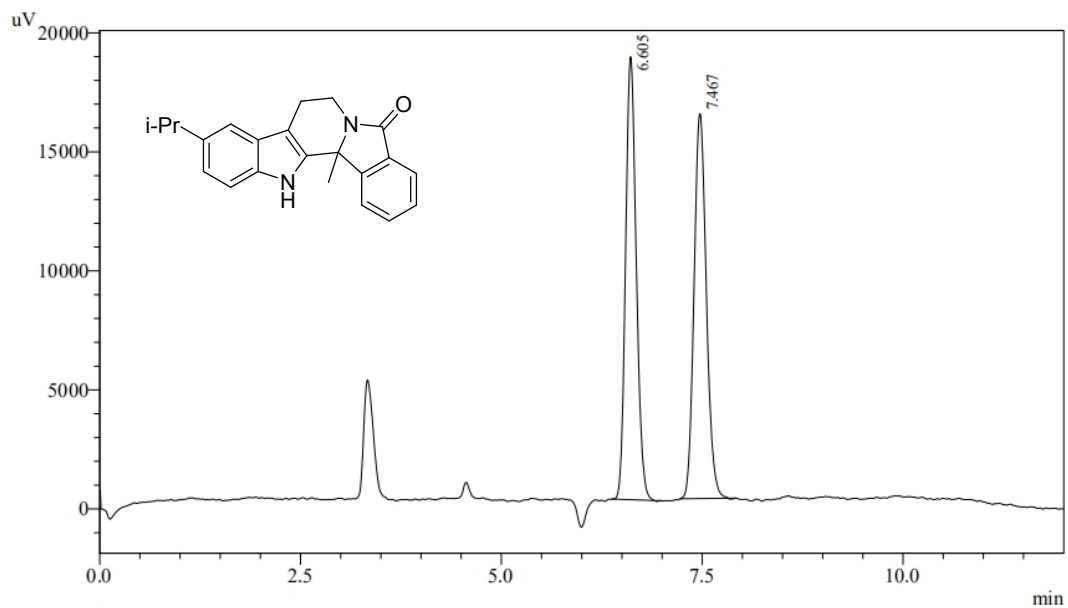

1 Det.A Ch1 / 254nm

Detector A Ch1 254nm

| Peak# | Ret. Time | Area   | Height | Area %  | Height % |
|-------|-----------|--------|--------|---------|----------|
| 1     | 6.605     | 170840 | 18604  | 49.931  | 53.502   |
| 2     | 7.467     | 171314 | 16168  | 50.069  | 46.498   |
| Total |           | 342154 | 34772  | 100.000 | 100.000  |

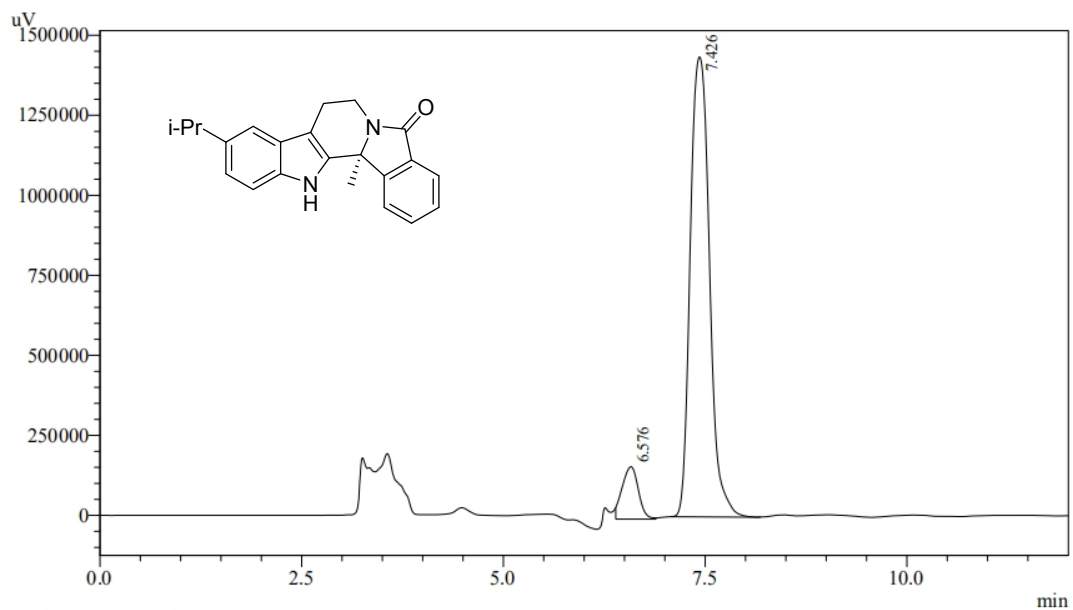

1 Det.A Ch1 / 254nm

Detector A Ch1 254nm

| Peak# | Ret. Time | Area     | Height  | Area %  | Height % |
|-------|-----------|----------|---------|---------|----------|
| 1     | 6.576     | 2285349  | 163474  | 8.759   | 10.216   |
| 2     | 7.426     | 23806602 | 1436742 | 91.241  | 89.784   |
| Total |           | 26091951 | 1600217 | 100.000 | 100.000  |

**11-bromo-13b-methyl-7,8,13,13b-tetrahydro-5H-benzo[1,2]indolizino[8,7-b]indol-5-one (2o)**

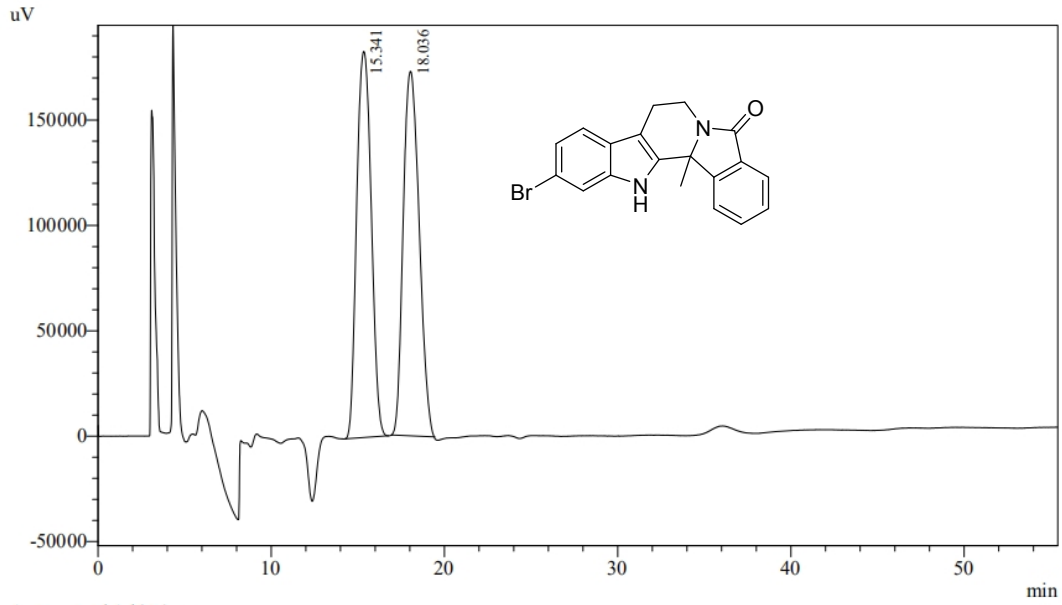

1 Det.A Ch1 / 254nm

Detector A Ch1 254nm

| Peak# | Ret. Time | Area     | Height | Area %  | Height % |
|-------|-----------|----------|--------|---------|----------|
| 1     | 15.341    | 10706847 | 183230 | 49.085  | 51.438   |
| 2     | 18.036    | 11106020 | 172984 | 50.915  | 48.562   |
| Total |           | 21812867 | 356215 | 100.000 | 100.000  |

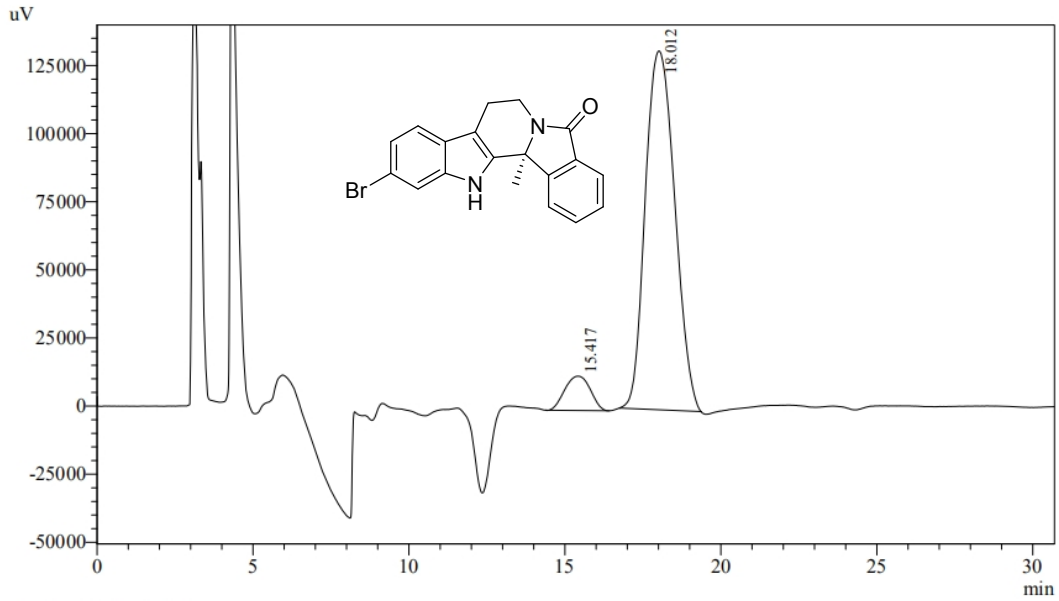

1 Det.A Ch1 / 254nm

Detector A Ch1 254nm

| Peak# | Ret. Time | Area    | Height | Area %  | Height % |
|-------|-----------|---------|--------|---------|----------|
| 1     | 15.417    | 717237  | 12614  | 7.639   | 8.742    |
| 2     | 18.012    | 8671598 | 131682 | 92.361  | 91.258   |
| Total |           | 9388835 | 144296 | 100.000 | 100.000  |

## 12,13b-dimethyl-7,8,13,13b-tetrahydro-5H-benzo[1,2]indolizino[8,7-b]indol-5-one (2p)

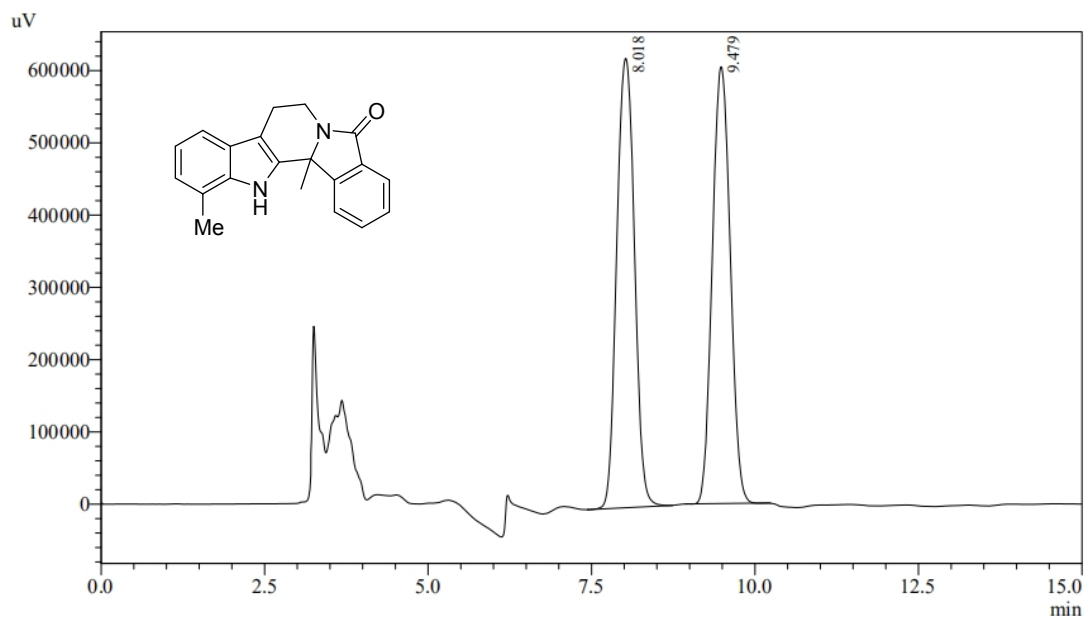

1 Det.A Ch1 / 254nm

Detector A Ch1 254nm

| Peak# | Ret. Time | Area     | Height  | Area %  | Height % |
|-------|-----------|----------|---------|---------|----------|
| 1     | 8.018     | 11748519 | 621879  | 50.424  | 50.705   |
| 2     | 9.479     | 11551141 | 604597  | 49.576  | 49.295   |
| Total |           | 23299661 | 1226476 | 100.000 | 100.000  |

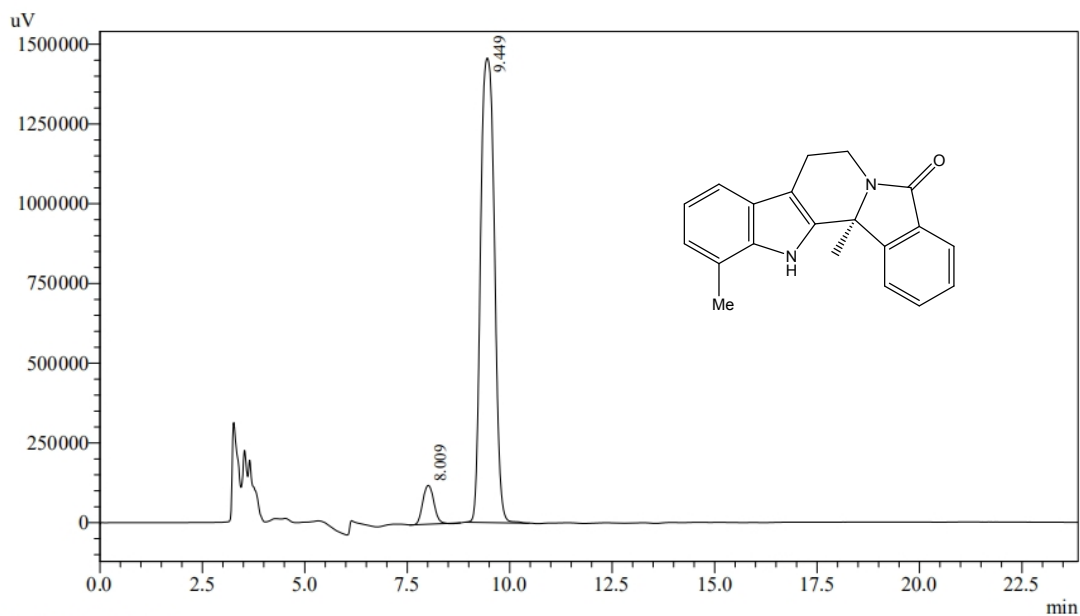

1 Det.A Ch1 / 254nm

Detector A Ch1 254nm

| Peak# | Ret. Time | Area     | Height  | Area %  | Height % |
|-------|-----------|----------|---------|---------|----------|
| 1     | 8.009     | 2294659  | 121658  | 6.315   | 7.711    |
| 2     | 9.449     | 34041465 | 1456141 | 93.685  | 92.289   |
| Total |           | 36336123 | 1577799 | 100.000 | 100.000  |

**9,11,13b-trimethyl-7,8,13,13b-tetrahydro-5H-benzo[1,2]indolizino[8,7-b]indol-5-one (2q)**

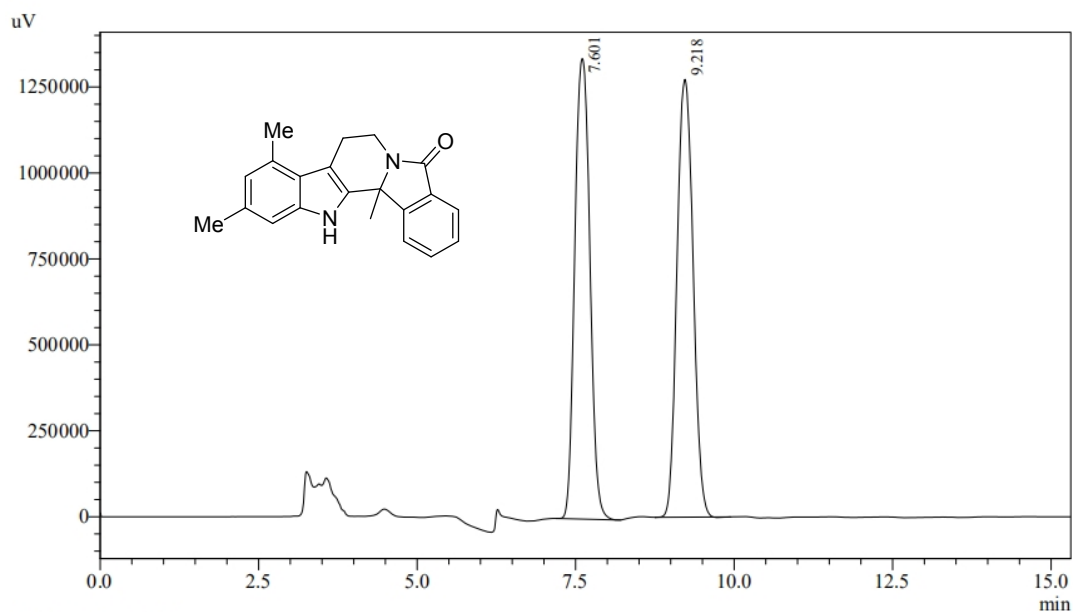

1 Det.A Ch1 / 254nm

Detector A Ch1 254nm

| Peak# | Ret. Time | Area     | Height  | Area %  | Height % |
|-------|-----------|----------|---------|---------|----------|
| 1     | 7.601     | 22243772 | 1339164 | 49.688  | 51.263   |
| 2     | 9.218     | 22523172 | 1273200 | 50.312  | 48.737   |
| Total |           | 44766944 | 2612364 | 100.000 | 100.000  |

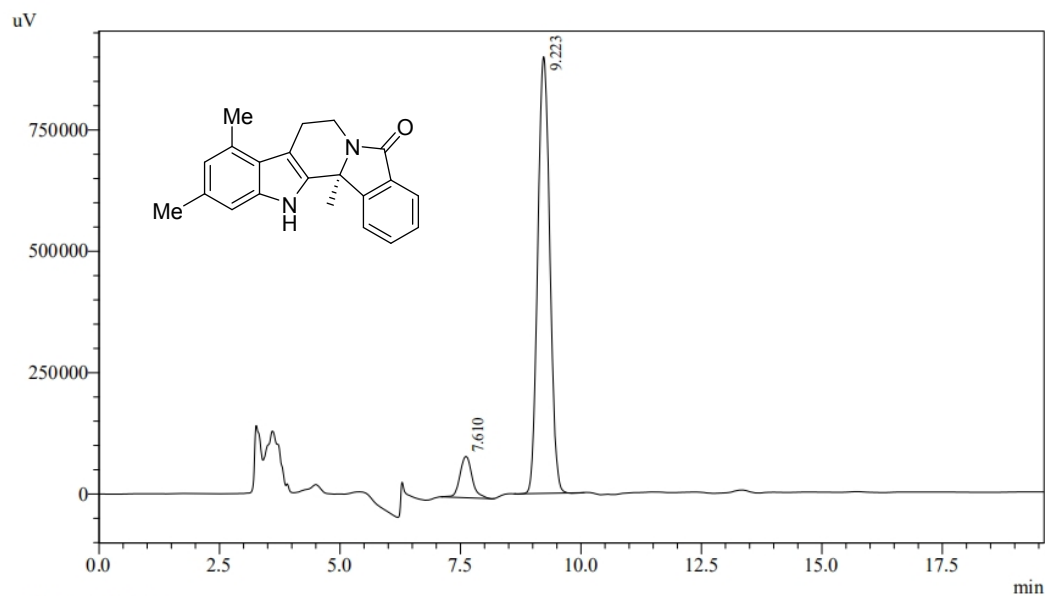

1 Det.A Ch1 / 254nm

Detector A Ch1 254nm

| Peak# | Ret. Time | Area     | Height | Area %  | Height % |
|-------|-----------|----------|--------|---------|----------|
| 1     | 7.610     | 1487422  | 84949  | 8.699   | 8.630    |
| 2     | 9.223     | 15611351 | 899447 | 91.301  | 91.370   |
| Total |           | 17098773 | 984396 | 100.000 | 100.000  |

# 10,12,13b-trimethyl-7,8,13,13b-tetrahydro-5H-benzo[1,2]indolizino[8,7-b]indol-5-one(2r)

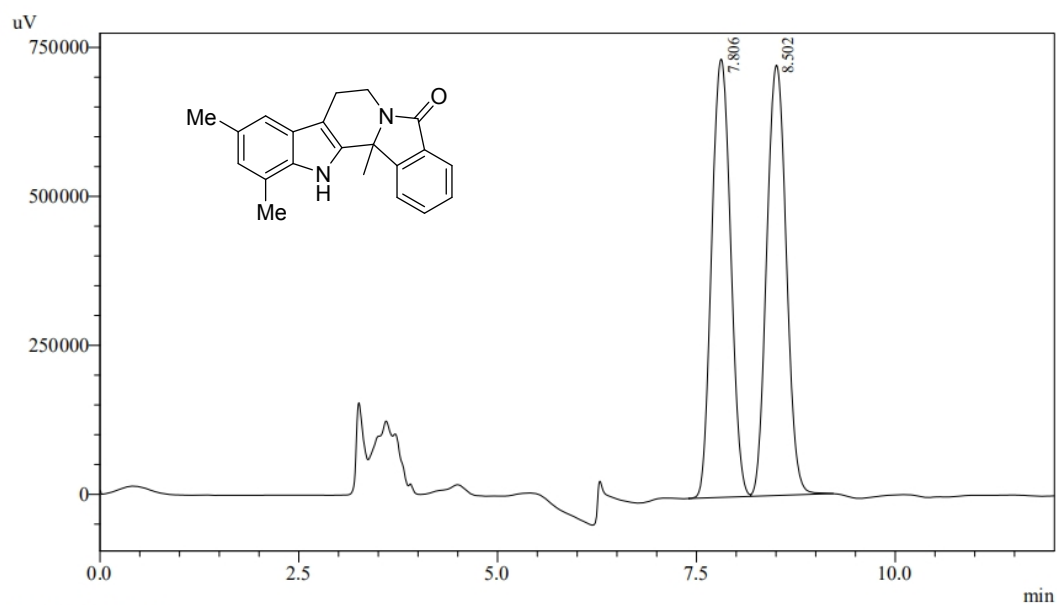

1 Det.A Ch1 / 254nm

Detector A Ch1 254nm

| Peak# | Ret. Time | Area     | Height  | Area %  | Height % |
|-------|-----------|----------|---------|---------|----------|
| 1     | 7.806     | 12244370 | 735404  | 49.795  | 50.450   |
| 2     | 8.502     | 12345428 | 722284  | 50.205  | 49.550   |
| Total |           | 24589798 | 1457688 | 100.000 | 100.000  |

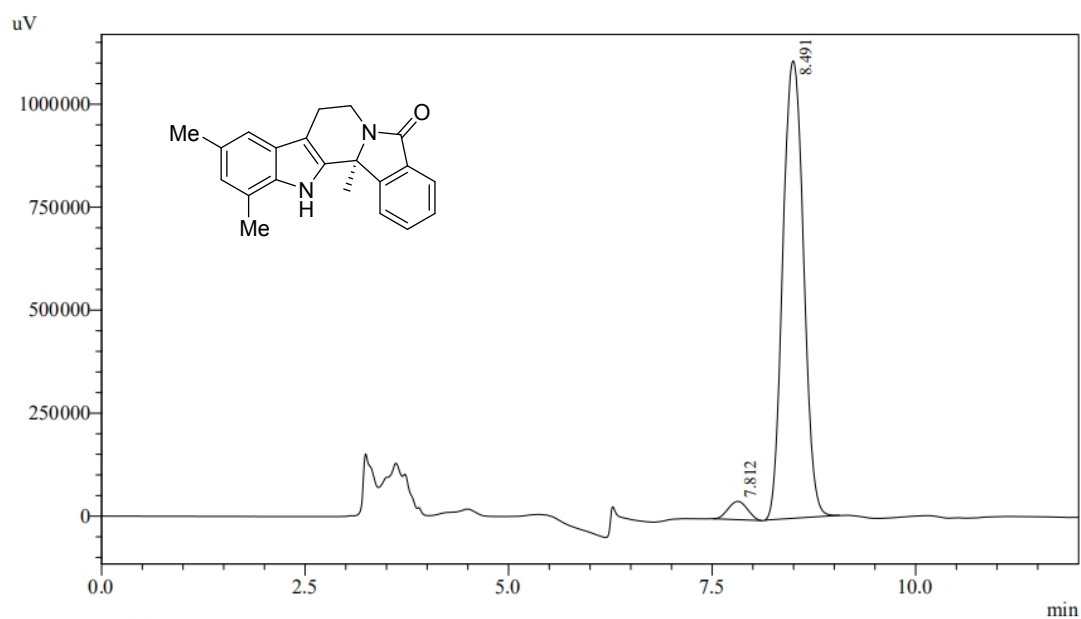

1 Det.A Ch1 / 254nm

Detector A Ch1 254nm

| Peak# | Ret. Time | Area     | Height  | Area %  | Height % |
|-------|-----------|----------|---------|---------|----------|
| 1     | 7.812     | 728531   | 44425   | 3.570   | 3.848    |
| 2     | 8.491     | 19675728 | 1110086 | 96.430  | 96.152   |
| Total |           | 20404260 | 1154511 | 100.000 | 100.000  |

**7,8,13,13b-tetrahydro-5H-benzo[1,2]indolizino[8,7-b]indol-5-one (6)**

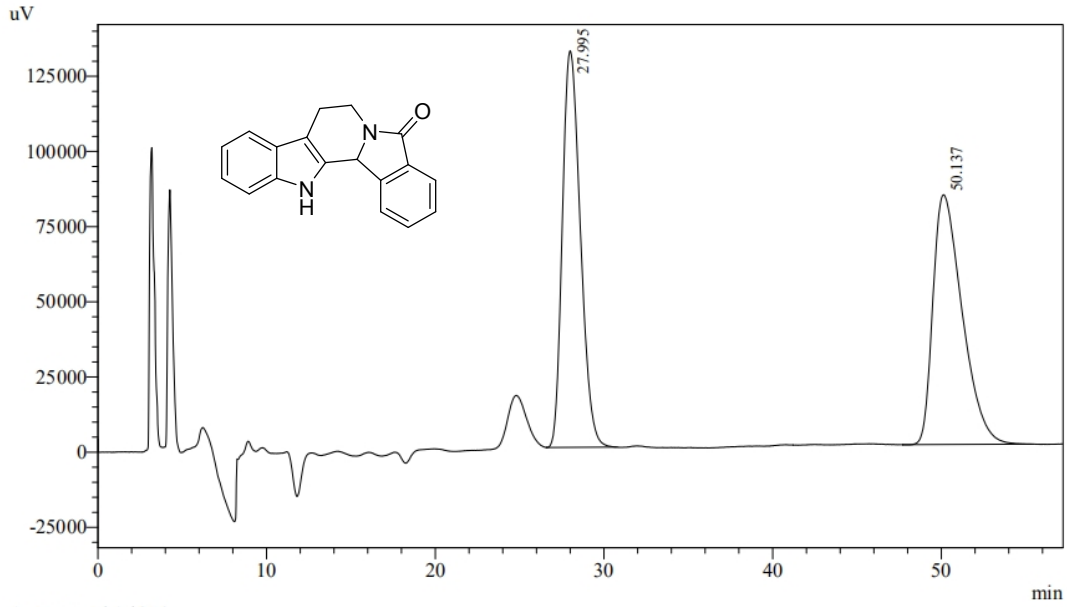

1 Det.A Ch1 / 254nm

Detector A Ch1 254nm

| Peak# | Ret. Time | Area     | Height | Area %  | Height % |
|-------|-----------|----------|--------|---------|----------|
| 1     | 27.995    | 9784198  | 131854 | 49.429  | 61.352   |
| 2     | 50.137    | 10010387 | 83059  | 50.571  | 38.648   |
| Total |           | 19794586 | 214913 | 100.000 | 100.000  |

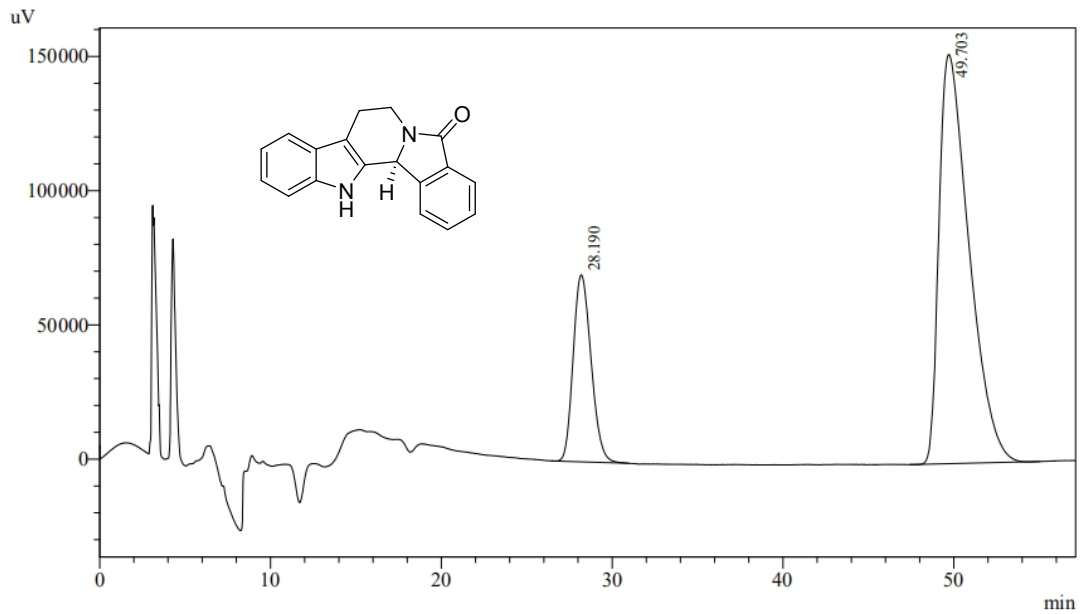

1 Det.A Ch1 / 254nm

Detector A Ch1 254nm

| Peak# | Ret. Time | Area     | Height | Area %  | Height % |
|-------|-----------|----------|--------|---------|----------|
| 1     | 28.190    | 5068841  | 69651  | 21.419  | 31.363   |
| 2     | 49.703    | 18595972 | 152431 | 78.581  | 68.637   |
| Total |           | 23664814 | 222082 | 100.000 | 100.000  |

**13b-methyl-7,8,13,13b-tetrahydro-5H-benzo[1,2]indolizino[8,7-b]indole (7)**

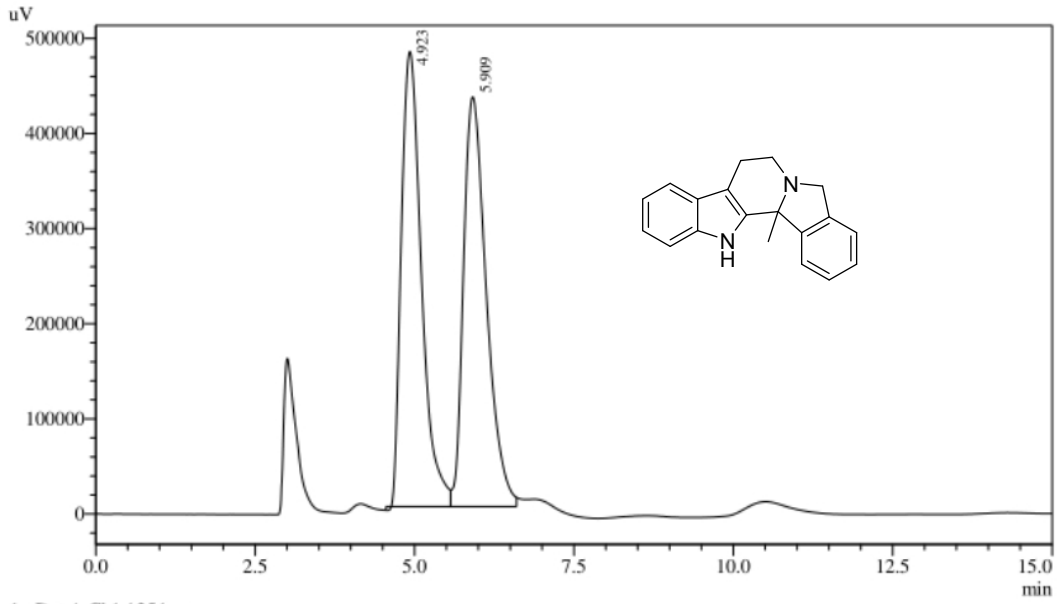

1 Det.A Ch1 / 254nm

Detector A Ch1 254nm

| Peak# | Ret. Time | Area     | Height | Area %  | Height % |
|-------|-----------|----------|--------|---------|----------|
| 1     | 4.923     | 10520261 | 478533 | 49.409  | 52.630   |
| 2     | 5.909     | 10771987 | 430710 | 50.591  | 47.370   |
| Total |           | 21292248 | 909243 | 100.000 | 100.000  |

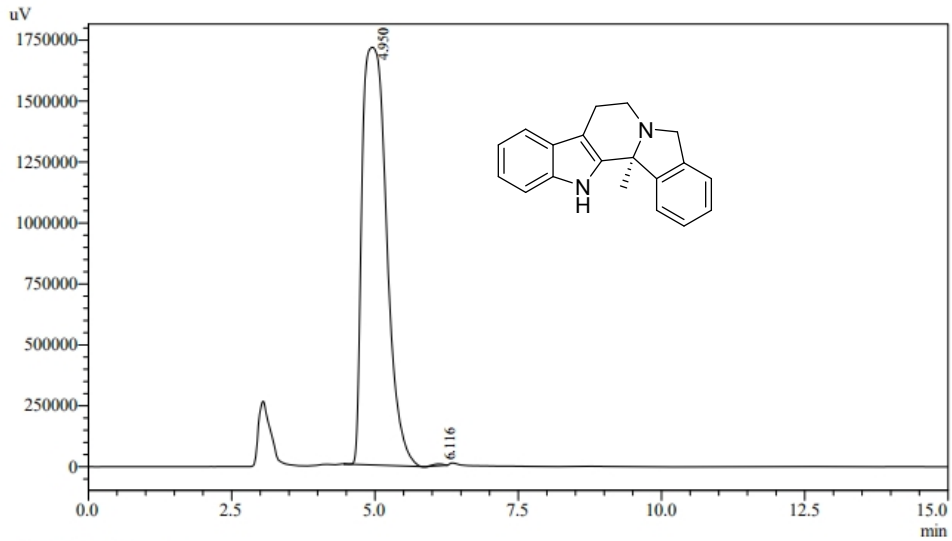

1 Det.A Ch1 / 254nm

Detector A Ch1 254nm

| Peak# | Ret. Time | Area     | Height  | Area %  | Height % |
|-------|-----------|----------|---------|---------|----------|
| 1     | 4.950     | 50931568 | 1712635 | 99.816  | 99.580   |
| 2     | 6.116     | 94042    | 7217    | 0.184   | 0.420    |
| Total |           | 51025610 | 1719852 | 100.000 | 100.000  |



---

## 5. X-ray crystal structure of (*S*)-2a

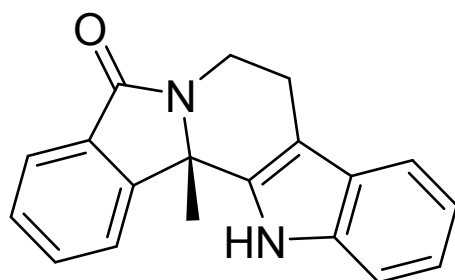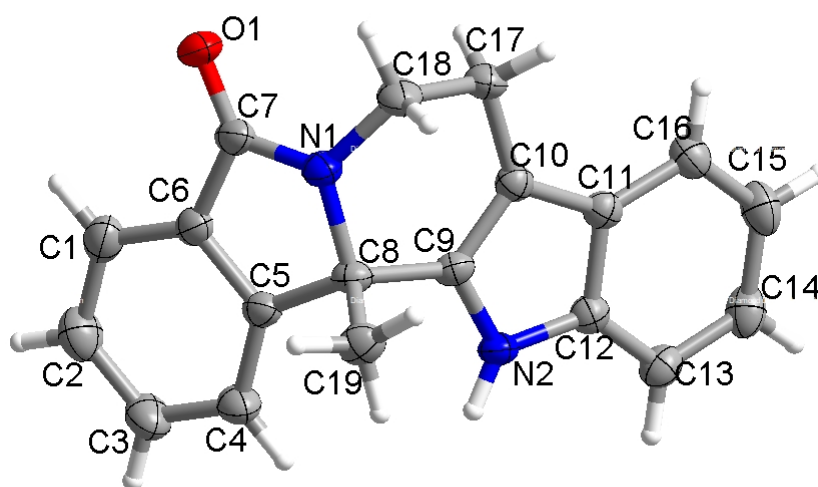

**Flack parameter: 0.2 (3)**

Table 1 Crystal data and structure refinement for 20200658.

|                     |                                                  |
|---------------------|--------------------------------------------------|
| Identification code | 20200658                                         |
| Empirical formula   | C <sub>19</sub> H <sub>16</sub> N <sub>2</sub> O |
| Formula weight      | 288.34                                           |
| Temperature/K       | 293(2)                                           |
| Crystal system      | orthorhombic                                     |
| Space group         | P212121                                          |
| <i>a</i> /Å         | 7.4363(4)                                        |

|                                             |                                        |
|---------------------------------------------|----------------------------------------|
| b/Å                                         | 14.1125(9)                             |
| c/Å                                         | 14.2240(9)                             |
| $\alpha$ /°                                 | 90                                     |
| $\beta$ /°                                  | 90                                     |
| $\gamma$ /°                                 | 90                                     |
| Volume/Å <sup>3</sup>                       | 1492.72(15)                            |
| Z                                           | 4                                      |
| $\rho$ calcg/cm <sup>3</sup>                | 1.283                                  |
| $\mu$ /mm <sup>-1</sup>                     | 0.635                                  |
| F(000)                                      | 608.0                                  |
| Crystal size/mm <sup>3</sup>                | 0.16 × 0.1 × 0.08                      |
| Radiation                                   | CuK $\alpha$ ( $\lambda$ = 1.54184)    |
| 2 $\Theta$ range for data collection/°      | 8.826 to 142.17                        |
| Index ranges                                | -6 ≤ h ≤ 8, -16 ≤ k ≤ 17, -17 ≤ l ≤ 16 |
| Reflections collected                       | 6222                                   |
| Independent reflections                     | 2815 [Rint = 0.0346, Rsigma = 0.0481]  |
| Data/restraints/parameters                  | 2815/0/188                             |
| Goodness-of-fit on F <sup>2</sup>           | 1.021                                  |
| Final R indexes [ $I \geq 2 \sigma(I)$ ]    | R1 = 0.0496, wR2 = 0.1201              |
| Final R indexes [all data]                  | R1 = 0.0607, wR2 = 0.1301              |
| Largest diff. peak/hole / e Å <sup>-3</sup> | 0.15/-0.20                             |
| Flack parameter                             | 0.2(3)                                 |

Table 2 Fractional Atomic Coordinates ( $\times 104$ ) and Equivalent Isotropic Displacement Parameters ( $\text{Å}^2 \times 103$ ) for 20200658.  $U_{eq}$  is defined as 1/3 of of the trace of the orthogonalised UIJ tensor.

| Atom | x        | y       | z       | $U_{eq}$ |
|------|----------|---------|---------|----------|
| O1   | 10810(3) | 3329(3) | 2013(2) | 74.5(9)  |
| N1   | 8076(4)  | 4059(2) | 2228(2) | 49.2(7)  |

---

|     |         |            |            |          |
|-----|---------|------------|------------|----------|
| N2  | 3731(4) | 3433(2)    | 3337(2)    | 45.7(6)  |
| C3  | 5286(3) | 1490.1(18) | 803(2)     | 72.7(12) |
| C2  | 7074(4) | 1227.8(15) | 688(2)     | 74.2(12) |
| C1  | 8436(3) | 1800.8(18) | 1040.5(19) | 64.2(10) |
| C6  | 8011(2) | 2636.0(16) | 1508.2(16) | 48.2(8)  |
| C5  | 6222(3) | 2898.3(14) | 1623.0(15) | 46.3(7)  |
| C4  | 4860(2) | 2325.3(18) | 1270.2(19) | 60.0(9)  |
| C7  | 9168(5) | 3348(3)    | 1931(2)    | 54.0(9)  |
| C8  | 6129(4) | 3839(2)    | 2126(2)    | 44.4(7)  |
| C9  | 5395(4) | 3794(2)    | 3114(2)    | 42.6(7)  |
| C10 | 6255(4) | 4098(2)    | 3899(2)    | 43.4(7)  |
| C11 | 5071(5) | 3921(2)    | 4672(2)    | 44.7(7)  |
| C12 | 3510(5) | 3500(2)    | 4293(2)    | 45.4(7)  |
| C13 | 2070(5) | 3207(3)    | 4856(3)    | 53.0(8)  |
| C14 | 2228(6) | 3341(3)    | 5811(3)    | 61.3(10) |
| C15 | 3751(6) | 3759(3)    | 6201(3)    | 65.7(10) |
| C16 | 5182(6) | 4054(3)    | 5645(3)    | 57.3(9)  |
| C17 | 8117(5) | 4497(3)    | 3896(3)    | 54.2(9)  |
| C18 | 8648(5) | 4777(3)    | 2902(3)    | 59.8(9)  |
| C19 | 5149(6) | 4582(3)    | 1540(3)    | 59.5(9)  |

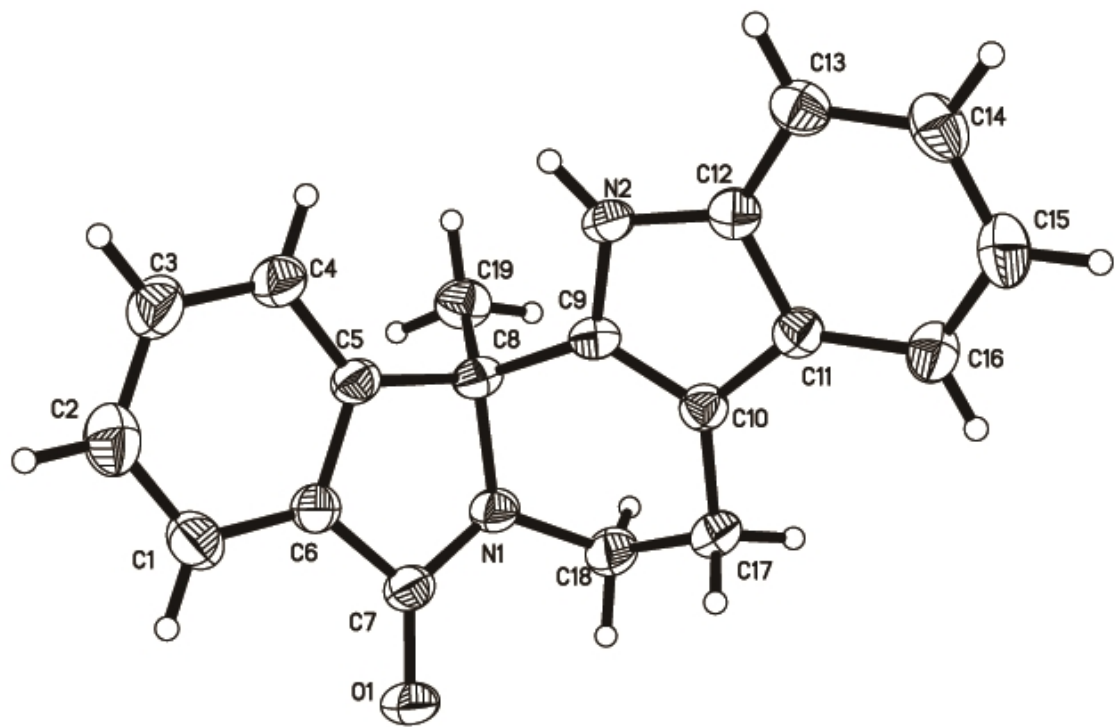

Supplement: d2nj00517d1.pdf [file d2nj00517d1.pdf]
